# Supplementary material for: Construction of isoxazolone-fused phenanthridines via Rh-catalyzed cascade C–H activation/cyclization of 3-arylisoxazolones with cyclic 2-diazo-1,3-diketones
Source: Royal Society of Chemistry journal article supplement (doi:10.1039/d0ob02310h), 2020-12-18

## Electronic Supplementary Information

### Construction of isoxazolone-fused phenanthridines *via* Rh-catalyzed Cascade C-H Activation/Cyclization of 3-Arylisoxazolones with Cyclic 2-Diazo-1,3-diketones

Wangcheng Hu, Xinwei He,\* Tongtong Zhou, Shiwen Zhang, Tingting Yang, Yongjia Shang\*

*Key Laboratory of Functional Molecular Solids, Ministry of Education, Anhui Laboratory of Molecule-Based Materials (State Key Laboratory Cultivation Base), College of Chemistry and Materials Science, Anhui Normal University, Wuhu 241000, P.R. China*

#### Table of contents

|                                                                                               |     |
|-----------------------------------------------------------------------------------------------|-----|
| 1. General comments-----                                                                      | S2  |
| 2. General procedure for the synthesis of ethyl 3-oxo-3-arylpropanoate-----                   | S2  |
| 3. General procedure for the synthesis of 3-aryl-5-isoxazolones-----                          | S2  |
| 4. General procedure for the synthesis of 2-diazo-1,3-diketones-----                          | S2  |
| 5. General procedure for the synthesis of isoxazolo[2,3- <i>f</i> ]phenanthridines-----       | S3  |
| 6. Large-scale synthesis-----                                                                 | S3  |
| 7. General procedure for further transformation-----                                          | S4  |
| 8. H/D exchange experiments-----                                                              | S4  |
| 9. General procedure for competitive experiment-----                                          | S5  |
| 10. Kinetic Isotope Effect studies-----                                                       | S6  |
| 11. Characterization data for all compounds-----                                              | S7  |
| 12. X-ray crystallographic data of compound <b>3aa</b> -----                                  | S16 |
| 13. <sup>1</sup> H, <sup>13</sup> C and/or <sup>19</sup> F NMR spectra for all compounds----- | S17 |

## 1. General comments

Unless otherwise specified, all reagents and starting materials were purchased from commercial sources and used as received without purification. The solvents were purified and dried using standard procedures. The chromatography solvents were technical grade and distilled prior to use. Flash chromatography was performed using 200-300 mesh silica gel with the indicated solvent system according to standard techniques. The  $^1\text{H}$  and  $^{13}\text{C}$  NMR spectra were recorded on a 500 MHz and 125 MHz NMR spectrometers, unless otherwise specified. Chemical shifts ( $\delta$ ) in parts per million were reported relative to the residual signals of chloroform (7.26 ppm for  $^1\text{H}$  and 77.0 ppm for  $^{13}\text{C}$ ), and all  $^{13}\text{C}$  NMR were recorded with proton broadband decoupling and indicated as  $^{13}\text{C}\{^1\text{H}\}$  NMR. Multiplicities are described as s (singlet), d (doublet), t (triplet), q (quartet), or m (multiplet), and the coupling constants ( $J$ ) are reported in Hertz (Hz). HRMS analysis with a quadrupole time-of-flight (TOF) mass spectrometer yielded ion mass/charge ( $m/z$ ) ratios in atomic mass units. The melting points were measured using SGWX-4 melting point apparatus.

## 2. General procedure for the synthesis of ethyl 3-oxo-3-arylpropanoate.

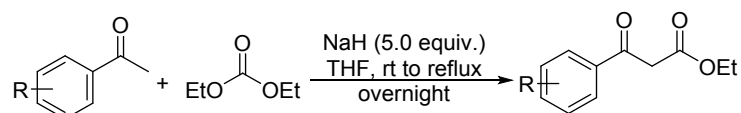

To a suspension of sodium hydride (60% in mineral oil, 5 equiv) and diethyl carbonate (10 mmol, 2.0 equiv.) in THF (10 mL) was added a solution of substituted acetophenone (5 mmol, 1.0 equiv.) in THF (10 mL) dropwise under reflux. The mixture was refluxed overnight then quenched with  $\text{H}_2\text{O}$ . The mixture was extracted with ethyl acetate for 3 times, and the combined organic phase was washed with brine, dried with anhydrous  $\text{Na}_2\text{SO}_4$ , and concentrated under reduced pressure. The residue was purified on a silica gel column to afford substituted ethyl benzoylacetate (petroleum ether /ethyl acetate, 20:1, v/v).

## 3. General procedure for the synthesis of 3-aryl-5-isoxazolones.

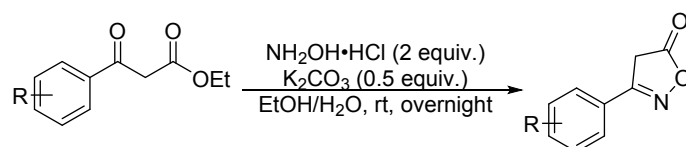

To a mixture of ethyl benzoylacetate (3 mmol, 1.0 equiv.), hydroxylamine hydrochloride (6 mmol, 2.0 equiv.) and potassium carbonate (1.5 mmol, 0.5 equiv.) in ethanol/water (10 mL, v/v = 1:1) was stirred at room temperature overnight. The solid was filtered, washed with water and extracted three times with ether. The combined organic layers were dried over  $\text{Na}_2\text{SO}_4$ , and concentrated under reduced pressure. The residue was purified on a silica gel column to afford substituted 3-arylisoxazol-5-ones (petroleum ether /ethyl acetate, 3:1, v/v).

## 4. General procedure for the synthesis of 2-diazo-1,3-diketones.

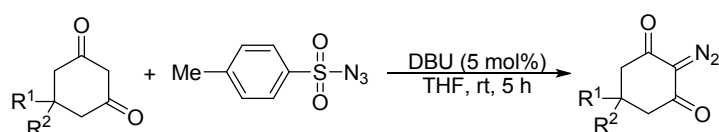

A mixture of 1,3-diketones (1 mmol), 4-methylbenzenesulfonyl azide (1 mmol), and 1,8-diazabicyclo[5.4.0]undec-7-ene (DBU) (5 mol%) in tetrahydrofuran (THF) (3 mL) in a sealed tube was stirred at room temperature for 5 h under argon atmosphere. After the reaction was complete (as determined using TLC), the reaction mixture was cooled to room temperature, extracted with CH<sub>2</sub>Cl<sub>2</sub> (3 × 10 mL), and washed with brine. The organic layers were combined, dried over Na<sub>2</sub>SO<sub>4</sub>, filtered, and then evaporated under vacuum. The residue was purified using flash column chromatography with a silica gel (200-300 mesh), using ethyl acetate and petroleum ether (1:3, v/v) as the elution solvent to give desired 2-diazo-1,3-diketones.

### 5. General procedure for the synthesis of isoxazolo[2,3-*f*]phenanthridines.

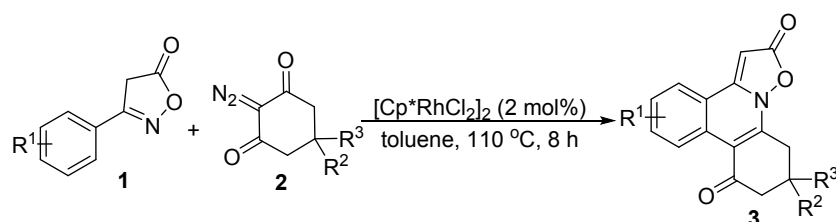

A mixture of 3-arylisoxazol-5(4*H*)-ones **1** (0.25 mmol), cyclic 2-diazo-1,3-diketones **2** (0.5 mmol), and [Cp\*RhCl<sub>2</sub>]<sub>2</sub> (0.005 mmol) in toluene (4 mL) in a sealed tube was heated to 110 °C in an oil bath for 8 h under air atmosphere. After the reaction was complete (as determined using TLC), the reaction mixture was cooled to room temperature, extracted with CH<sub>2</sub>Cl<sub>2</sub> (3 × 10 mL), and washed with brine. The organic layers were combined, dried over Na<sub>2</sub>SO<sub>4</sub>, filtered, and then evaporated under vacuum. The residue was purified using flash column chromatography with a silica gel (200-300 mesh), using ethyl acetate and petroleum ether (1:4, v/v) as the elution solvent to give desired product **3**.

### 6. Large-scale synthesis.

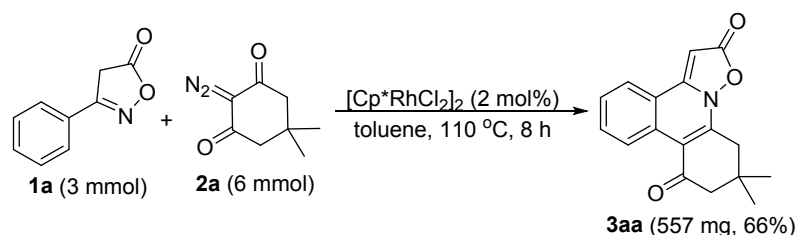

A mixture of 3-phenylisoxazol-5(4*H*)-one **1a** (3 mmol), 2-diazo-5,5-dimethylcyclohexane-1,3-dione **2a** (6 mmol), and [Cp\*RhCl<sub>2</sub>]<sub>2</sub> (0.06 mmol) in toluene (15 mL) in a sealed tube was heated to 110 °C in an oil bath for 8 h under air atmosphere. After the reaction was complete (as determined using TLC), the reaction mixture was cooled to room temperature, extracted with CH<sub>2</sub>Cl<sub>2</sub> (3 × 20 mL), and washed with brine. The organic layers were combined, dried over Na<sub>2</sub>SO<sub>4</sub>, filtered, and then evaporated under vacuum. The residue was purified using flash column chromatography with a silica gel (200-300 mesh), using ethyl acetate and petroleum ether (1:4, v/v) as the elution solvent to give desired product **3aa** in 66% yield (557 mg).

## 7. General procedure for further transformation.

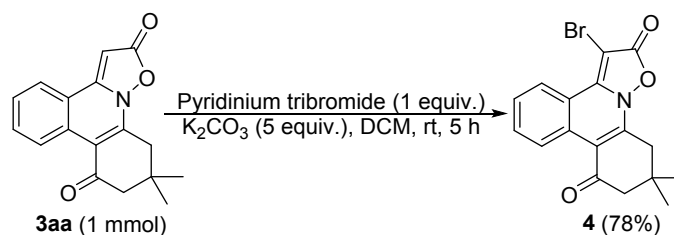

Compound **3aa** (1.0 mmol) was dissolved in dichloromethane (5 mL). Then potassium carbonate (5.0 mmol) and pyridinium tribromide (1.0 mmol) were added to this mixture at room temperature. The reaction mixture was stirred at room temperature for 5 h and then quenched with a saturated aqueous sodium bicarbonate solution (10 mL). The organic phase was extracted with ethyl acetate (3 × 20 mL), dried over Na<sub>2</sub>SO<sub>4</sub>, and then evaporated under vacuum. The residue was purified using flash column chromatography with a silica gel (200-300 mesh), using ethyl acetate and petroleum ether (1:8, v/v) as the elution solvent to give compound **4** in 78% yield.

## 8. H/D exchange experiments.

(1) H/D exchange experiments of substrate **1a**.

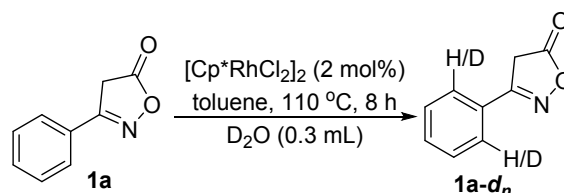

To the mixture of 3-phenylisoxazol-5(4H)-one **1a** (0.25 mmol), [Cp\*RhCl<sub>2</sub>]<sub>2</sub> (0.005 mmol) and toluene (3 mL) in a sealed tube was added D<sub>2</sub>O (0.3 mL) at room temperature under air atmosphere. The stirred mixture was then heated to 110 °C in an oil bath for further 2 h. After being cooled down to room temperature, it was purified by preparative chromatography to afford the starting material, which was subject to <sup>1</sup>H NMR test to determine the ratio of **1a** and **1a-d<sub>n</sub>**.

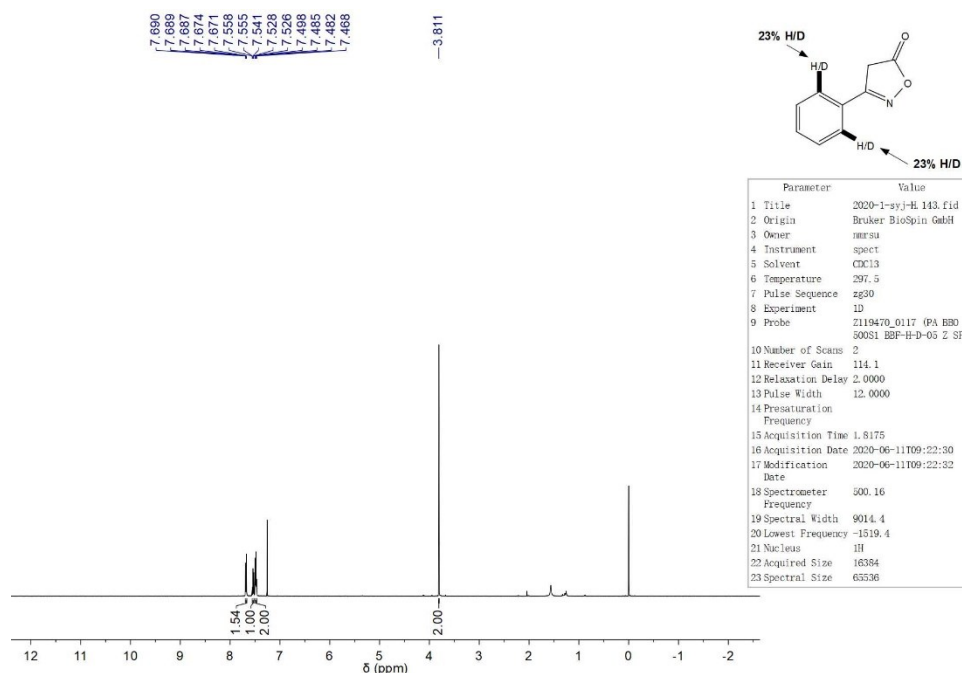



(2) H/D exchange experiments of compound **3aa**.

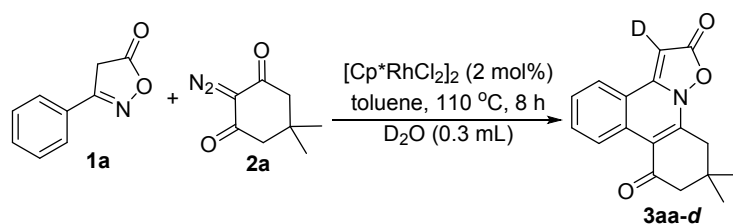

To the mixture of 3-phenylisoxazol-5(4*H*)-one **1a** (0.25 mmol), 2-diazo-5,5-dimethylcyclohexane-1,3-dione **2a** (0.5 mmol), [Cp\*RhCl<sub>2</sub>]<sub>2</sub> (0.005 mmol), and toluene (4 mL) in a sealed tube was added D<sub>2</sub>O (0.3 mL) at room temperature under air atmosphere. The stirred mixture was then heated to 110 °C in an oil bath for 8 h. After the reaction was complete (as determined using TLC), the reaction mixture was cooled to room temperature, extracted with CH<sub>2</sub>Cl<sub>2</sub> (3 × 10 mL), and washed with brine. The organic layers were combined, dried over Na<sub>2</sub>SO<sub>4</sub>, filtered, and then evaporated under vacuum. The residue was purified using flash column chromatography with a silica gel (200-300 mesh), using ethyl acetate and petroleum ether (1:4, v/v) as the elution solvent to give desired product **3aa-d** in 64% yield.

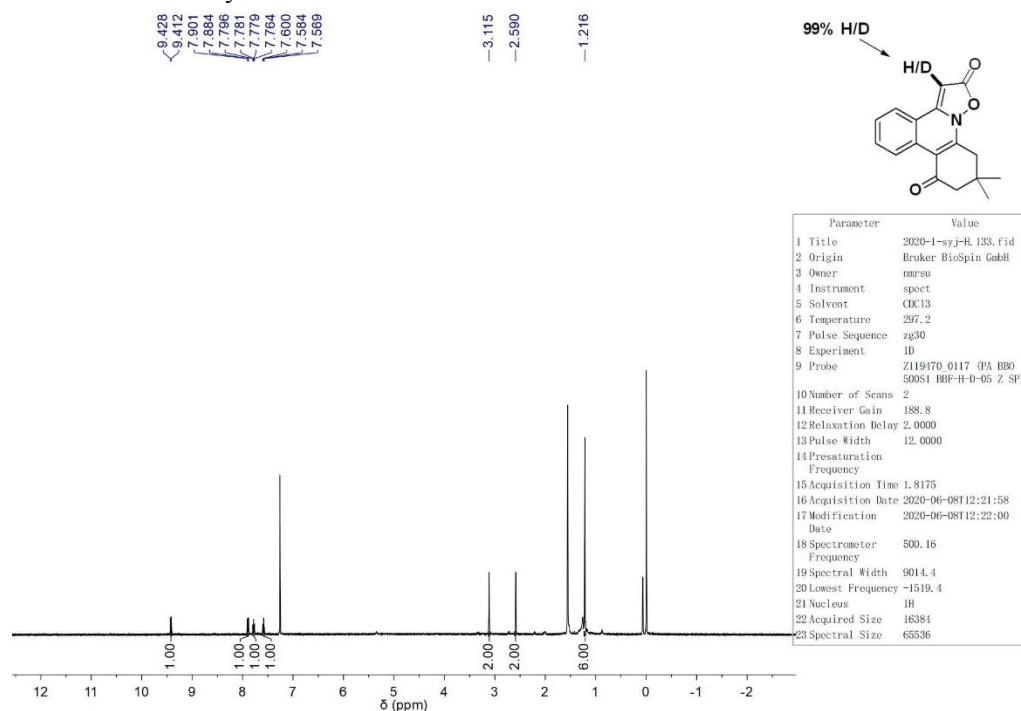

## 9. General procedure for competitive experiment.

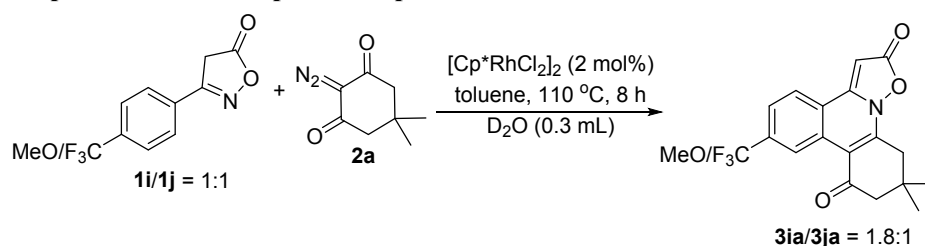

A mixture of 3-(4-methoxyphenyl)isoxazol-5(4*H*)-one **1i** (0.1 mmol), 3-(4-(trifluoromethyl)phenyl)isoxazol-5(4*H*)-one **1j** (0.1 mmol), 2-diazo-5,5-dimethylcyclohexane-1,3-dione **2a** (0.2 mmol), and [Cp\*RhCl<sub>2</sub>]<sub>2</sub> (0.002 mmol) in toluene (4 mL) in a sealed tube was heated

to 110 °C in an oil bath for 8 h under air atmosphere. After the reaction was complete (as determined using TLC), the reaction mixture was cooled to room temperature, extracted with CH<sub>2</sub>Cl<sub>2</sub> (3 × 10 mL), and washed with brine. The organic layers were combined, dried over Na<sub>2</sub>SO<sub>4</sub>, filtered, and then evaporated under vacuum. The residue was purified using flash column chromatography with a silica gel (200-300 mesh), using ethyl acetate and petroleum ether (1:4, v/v) as the elution solvent to give desired product **3ia** and **3ja** in 52% and 29%, respectively.

## 10. Kinetic Isotope Effect studies.

### (1) Parallel experiments

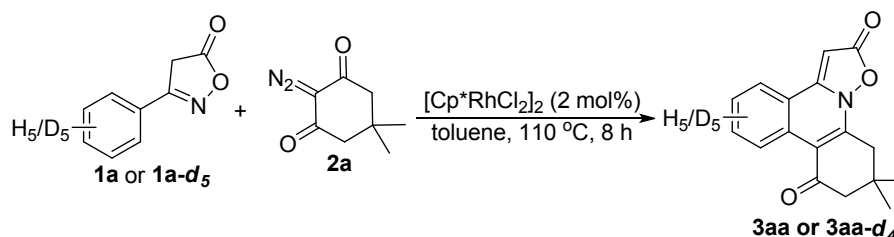

To the mixture of 3-phenylisoxazol-5(4*H*)-one **1a** (0.1 mmol) or 3-phenylisoxazol-5(4*H*)-one **1a-d<sub>5</sub>** (0.1 mmol), 2-diazo-5,5-dimethylcyclohexane-1,3-dione **2a** (0.2 mmol), [Cp\*RhCl<sub>2</sub>]<sub>2</sub> (0.002 mmol), and toluene (1.5 mL) in a sealed tube at room temperature under air atmosphere. The stirred mixture was then heated to 110 °C in an oil bath for 2 h. After the reaction was complete (as determined using TLC), the reaction mixture was cooled to room temperature, combined, extracted with CH<sub>2</sub>Cl<sub>2</sub> (3 × 10 mL), and washed with brine. The organic layer was dried over Na<sub>2</sub>SO<sub>4</sub>, filtered, and then evaporated under vacuum. The residues were combined and purified using flash column chromatography with a silica gel (200-300 mesh), using ethyl acetate and petroleum ether (1:4, v/v) as the elution solvent to afford the mixed products **3aa** and **3aa-d<sub>4</sub>**. The *K<sub>H/D</sub>* value was determined to be 1.5 by the <sup>1</sup>H NMR test.

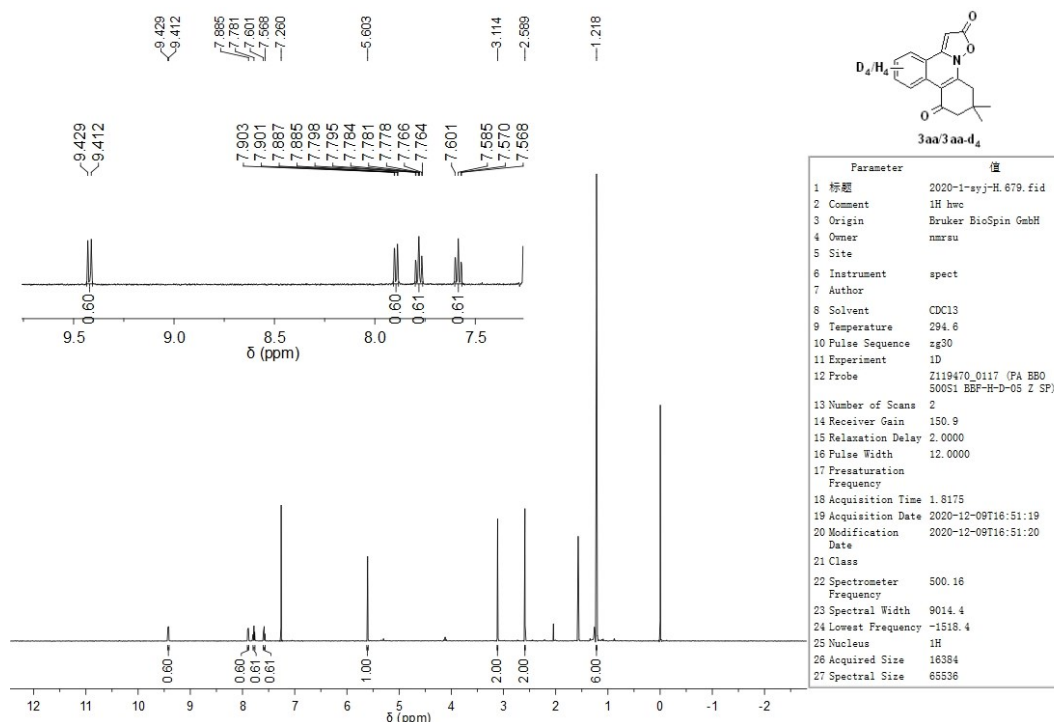

(2) competitive reaction

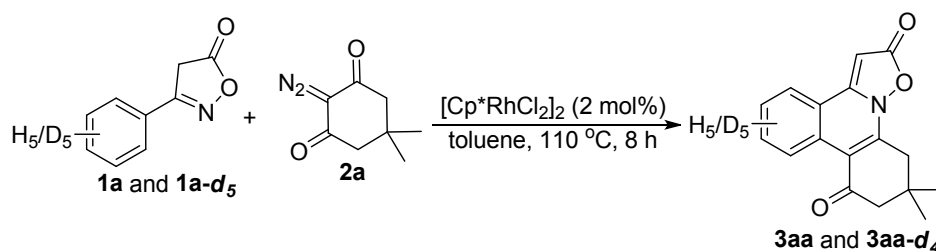

To the mixture of 3-phenylisoxazol-5(4H)-one **1a** (0.25 mmol), 3-phenylisoxazol-5(4H)-one **1a-d<sub>5</sub>** (0.25 mmol), 2-diazo-5,5-dimethylcyclohexane-1,3-dione **2a** (0.5 mmol), [Cp\*RhCl<sub>2</sub>]<sub>2</sub> (0.005 mmol), and toluene (4 mL) in a sealed tube at room temperature under air atmosphere. The stirred mixture was then heated to 110 °C in an oil bath for 2 h. After the reaction was complete (as determined using TLC), the reaction mixture was cooled to room temperature, extracted with CH<sub>2</sub>Cl<sub>2</sub> (3 × 10 mL), and washed with brine. The organic layers were combined, dried over Na<sub>2</sub>SO<sub>4</sub>, filtered, and then evaporated under vacuum. The residue was purified using flash column chromatography with a silica gel (200-300 mesh), using ethyl acetate and petroleum ether (1:4, v/v) as the elution solvent to afford the product **3aa** and **3aa-d<sub>4</sub>**. The  $K_{H/D}$  value was determined to be 2.2 by the <sup>1</sup>H NMR test.

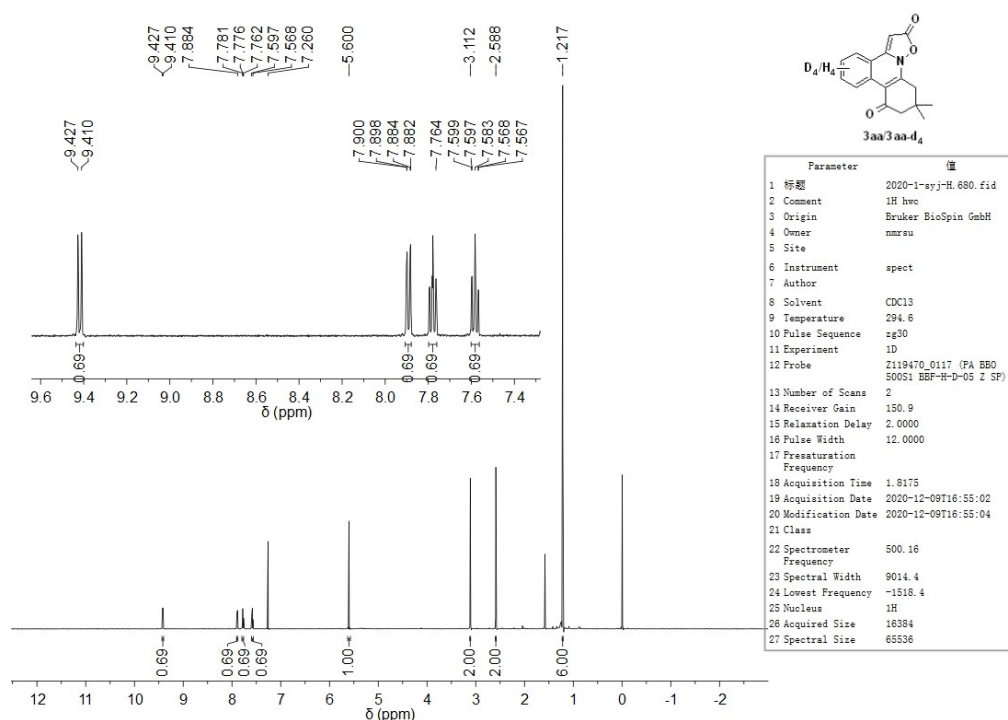

## 11. Characterization data for all compounds

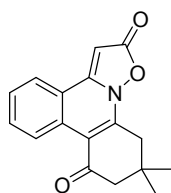

**10,10-Dimethyl-10,11-dihydro-2H-isoxazolo[2,3-*f*]phenanthridine-2,8(9H)-dione (3aa).** The title compound was prepared from 3-phenylisoxazol-5(4*H*)-one and 2-diazo-5,5-dimethylcyclohexane-1,3-dione according to the general procedures (synthesis of isoxazolo[2,3-*f*]phenanthridines) and purified by column chromatography (petroleum ether/ethyl acetate 4:1,  $R_f = 0.5$ ) to afford a yellow solid in 72% yield (50 mg); mp = 205–206 °C;  $^1\text{H NMR}$  (500 MHz,  $\text{CDCl}_3$ )  $\delta$  9.42 (d,  $J = 8.6$  Hz, 1H), 7.91–7.88 (m, 1H), 7.80–7.76 (m, 1H), 7.60–7.57 (m, 1H), 5.60 (s, 1H), 3.11 (s, 2H), 2.59 (s, 2H), 1.22 (s, 6H);  $^{13}\text{C NMR}$  (125 MHz,  $\text{CDCl}_3$ )  $\delta$  195.99, 168.02, 152.44, 143.56, 133.43, 129.72, 128.04, 127.21, 125.82, 119.78, 109.31, 75.89, 52.97, 37.72, 32.36, 28.35; HRMS (ESI-TOF)  $m/z$ :  $[\text{M}+\text{H}]^+$  calcd for  $\text{C}_{17}\text{H}_{16}\text{NO}_3$  282.1125; found 282.1132.

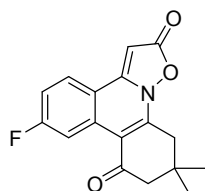

**6-Fluoro-10,10-dimethyl-10,11-dihydro-2H-isoxazolo[2,3-*f*]phenanthridine-2,8(9H)-dione (3ba).** The title compound was prepared from 3-(4-fluorophenyl)isoxazol-5(4*H*)-one and 2-diazo-5,5-dimethylcyclohexane-1,3-dione according to the general procedures (synthesis of isoxazolo[2,3-*f*]phenanthridines) and purified by column chromatography (petroleum ether/ethyl acetate 4:1,  $R_f = 0.5$ ) to afford a yellow solid in 53% yield (39 mg); mp = 205–206 °C;  $^1\text{H NMR}$  (500 MHz,  $\text{CDCl}_3$ )  $\delta$  9.20 (dd,  $J = 12.0, 2.6$  Hz, 1H), 7.90 (dd,  $J = 8.9, 5.7$  Hz, 1H), 7.34–7.30 (m, 1H), 5.57 (s, 1H), 3.11 (s, 2H), 2.59 (s, 2H), 1.22 (s, 6H);  $^{13}\text{C NMR}$  (125 MHz,  $\text{CDCl}_3$ )  $\delta$  195.66, 167.74, 166.70 (d,  $J_{\text{C-F}} = 251.7$  Hz), 151.91, 144.40, 132.14 (d,  $J_{\text{C-F}} = 11.8$  Hz), 128.34 (d,  $J_{\text{C-F}} = 10.0$  Hz), 117.08 (d,  $J_{\text{C-F}} = 24.5$  Hz), 116.37, 113.27 (d,  $J_{\text{C-F}} = 26.0$  Hz), 108.54, 108.51, 75.92, 52.75, 37.74, 32.31, 28.33;  $^{19}\text{F NMR}$  (471 MHz,  $\text{CDCl}_3$ )  $\delta$  -102.0; HRMS (ESI-TOF)  $m/z$ :  $[\text{M}+\text{H}]^+$  calcd for  $\text{C}_{17}\text{H}_{15}\text{FNO}_3$  300.1030; found 300.1025.

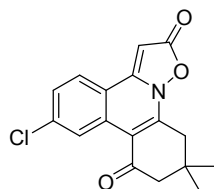

**6-Chloro-10,10-dimethyl-10,11-dihydro-2H-isoxazolo[2,3-*f*]phenanthridine-2,8(9H)-dione (3ca).** The title compound was prepared from 3-(4-chlorophenyl)isoxazol-5(4*H*)-one and 2-diazo-5,5-dimethylcyclohexane-1,3-dione according to the general procedures (synthesis of isoxazolo[2,3-*f*]phenanthridines) and purified by column chromatography (petroleum ether/ethyl acetate 4:1,  $R_f = 0.5$ ) to afford a yellow solid in 57% yield (45 mg); mp = 229–30 °C;  $^1\text{H NMR}$  (500 MHz,  $\text{CDCl}_3$ )  $\delta$  9.51 (d,  $J = 2.0$  Hz, 1H), 7.82 (d,  $J = 8.6$  Hz, 1H), 7.55 (dd,  $J = 8.6, 2.0$  Hz, 1H), 5.60 (s, 1H), 3.11 (s, 2H), 2.59 (s, 2H), 1.22 (s, 6H);  $^{13}\text{C NMR}$  (125 MHz,  $\text{CDCl}_3$ )  $\delta$  195.56, 167.66, 151.95, 144.44, 131.46, 130.95, 129.97, 128.93, 127.02, 118.39, 108.12, 76.40, 52.80, 37.78, 32.33, 28.33; HRMS (ESI-TOF)  $m/z$ :  $[\text{M}+\text{H}]^+$  calcd for  $\text{C}_{17}\text{H}_{15}\text{ClNO}_3$  316.0735; found 316.0740.

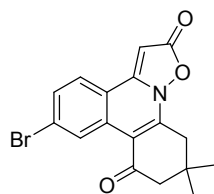

**6-Bromo-10,10-dimethyl-10,11-dihydro-2H-isoxazolo[2,3-f]phenanthridine-2,8(9H)-dione(3da).**

The title compound was prepared from 3-(4-bromophenyl)isoxazol-5(4H)-one and 2-diazo-5,5-dimethylcyclohexane-1,3-dione according to the general procedures (synthesis of isoxazolo[2,3-f]phenanthridines) and purified by column chromatography (petroleum ether/ethyl acetate 4:1,  $R_f = 0.5$ ) to afford a red solid in 78% yield (69 mg); mp = 217-218 °C;  $^1\text{H NMR}$  (500 MHz,  $\text{CDCl}_3$ )  $\delta$  9.67 (d,  $J = 1.8$  Hz, 1H), 7.75–7.72 (m, 1H), 7.70–7.67 (m, 1H), 5.60 (s, 1H), 3.11 (s, 2H), 2.58 (s, 2H), 1.21 (s, 6H);  $^{13}\text{C NMR}$  (125 MHz,  $\text{CDCl}_3$ )  $\delta$  195.56, 167.61, 151.82, 144.43, 131.34, 130.85, 129.81, 128.82, 126.96, 118.28, 108.01, 76.33, 52.72, 37.69, 32.26, 28.28; HRMS (ESI-TOF)  $m/z$ :  $[\text{M}+\text{H}]^+$  calcd for  $\text{C}_{17}\text{H}_{15}\text{BrNO}_3$  360.0230; found 360.0239.

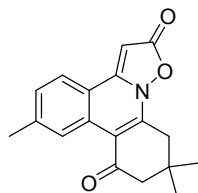

**6,10,10-Trimethyl-10,11-dihydro-2H-isoxazolo[2,3-f]phenanthridine-2,8(9H)-dione (3ea).**

The title compound was prepared from 3-(*p*-tolyl)isoxazol-5(4H)-one and 2-diazo-5,5-dimethylcyclohexane-1,3-dione according to the general procedures (synthesis of isoxazolo[2,3-f]phenanthridines) and purified by column chromatography (petroleum ether/ethyl acetate 4:1,  $R_f = 0.5$ ) to afford a yellow solid in 76% yield (56 mg); mp = 200-201 °C;  $^1\text{H NMR}$  (500 MHz,  $\text{CDCl}_3$ )  $\delta$  9.24 (s, 1H), 7.78 (d,  $J = 8.1$  Hz, 1H), 7.41 (d,  $J = 8.2$  Hz, 1H), 5.55 (s, 1H), 3.10 (s, 2H), 2.58 (s, 2H), 2.56 (s, 3H), 1.21 (s, 6H);  $^{13}\text{C NMR}$  (125 MHz,  $\text{CDCl}_3$ )  $\delta$  196.18, 168.21, 152.37, 144.49, 143.54, 129.73, 129.53, 126.85, 125.71, 117.51, 109.14, 75.26, 53.01, 37.71, 32.32, 28.31, 22.60; HRMS (ESI-TOF)  $m/z$ :  $[\text{M}+\text{H}]^+$  calcd for  $\text{C}_{18}\text{H}_{18}\text{NO}_3$  296.1281; found 296.1285.

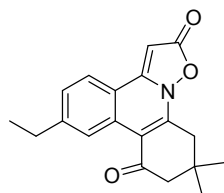

**6-Ethyl-10,10-dimethyl-10,11-dihydro-2H-isoxazolo[2,3-f]phenanthridine-2,8(9H)-dione (3fa).**

The title compound was prepared from 3-(4-ethylphenyl)isoxazol-5(4H)-one and 2-diazo-5,5-dimethylcyclohexane-1,3-dione according to the general procedures (synthesis of isoxazolo[2,3-f]phenanthridines) and purified by column chromatography (petroleum ether/ethyl acetate 4:1,  $R_f = 0.5$ ) to afford a yellow solid in 73% yield (56 mg); mp = 171-172 °C;  $^1\text{H NMR}$  (500 MHz,  $\text{CDCl}_3$ )  $\delta$  9.27 – 9.26 (m, 1H), 7.81 (d,  $J = 8.2$  Hz, 1H), 7.43 (dd,  $J = 8.2, 1.7$  Hz, 1H), 5.54 (s, 1H), 3.10 (s, 2H), 2.84 (q,  $J = 7.6$  Hz, 2H), 2.58 (s, 2H), 1.32 (t,  $J = 7.6$  Hz, 3H), 1.21 (s, 6H);  $^{13}\text{C NMR}$  (125 MHz,  $\text{CDCl}_3$ )  $\delta$  196.06, 167.99, 152.19, 150.46, 143.44, 129.72, 128.30, 125.73, 125.62, 117.55, 109.03, 75.10, 52.88, 37.54, 32.17, 29.69, 28.21, 15.34; HRMS (ESI-TOF)  $m/z$ :  $[\text{M}+\text{H}]^+$  calcd for  $\text{C}_{19}\text{H}_{20}\text{NO}_3$  310.1438; found 310.1434.

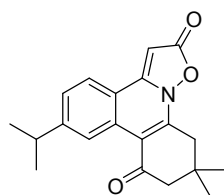

**6-isopropyl-10,10-dimethyl-10,11-dihydro-2H-isoxazolo[2,3-f]phenanthridine-2,8(9H)-dione**

**(3ga).** The title compound was prepared from 3-(4-isopropylphenyl)isoxazol-5(4*H*)-one and 2-diazo-5,5-dimethylcyclohexane-1,3-dione according to the general procedures (synthesis of isoxazolo[2,3-*f*]phenanthridines) and purified by column chromatography (petroleum ether/ethyl acetate 4:1,  $R_f = 0.5$ ) to afford a yellow solid in 71% yield (57 mg); mp = 105-106 °C;  $^1\text{H NMR}$  (500 MHz,  $\text{CDCl}_3$ )  $\delta$  9.30 (d,  $J = 1.6$  Hz, 1H), 7.81 (d,  $J = 8.3$  Hz, 1H), 7.46 (dd,  $J = 8.3, 1.6$  Hz, 1H), 5.53 (s, 1H), 3.13–3.08 (m, 3H), 2.57 (s, 2H), 1.33 (d,  $J = 6.9$  Hz, 6H), 1.20 (s, 6H);  $^{13}\text{C NMR}$  (125 MHz,  $\text{CDCl}_3$ )  $\delta$  196.20, 168.19, 155.17, 152.37, 143.49, 129.94, 127.02, 125.91, 124.59, 117.86, 109.31, 75.23, 53.07, 37.72, 35.04, 32.33, 28.32, 23.82; HRMS (ESI-TOF)  $m/z$ :  $[\text{M}+\text{H}]^+$  calcd for  $\text{C}_{20}\text{H}_{22}\text{NO}_3$  324.1594; found 324.1587

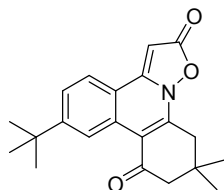

**6-(tert-Butyl)-10,10-dimethyl-10,11-dihydro-2H-isoxazolo[2,3-*f*]phenanthridine-2,8(9*H*)-dione (3ha).** The title compound was prepared from 3-(4-(*tert*-butyl)phenyl)isoxazol-5(4*H*)-one and 2-diazo-5,5-dimethylcyclohexane-1,3-dione according to the general procedures (synthesis of isoxazolo[2,3-*f*]phenanthridines) and purified by column chromatography (petroleum ether/ethyl acetate 4:1,  $R_f = 0.5$ ) to afford a yellow solid in 83% yield (69 mg); mp = 136-137 °C;  $^1\text{H NMR}$  (500 MHz,  $\text{CDCl}_3$ )  $\delta$  9.51 (d,  $J = 1.7$  Hz, 1H), 7.82 (d,  $J = 8.5$  Hz, 1H), 7.65 (dd,  $J = 8.5, 1.9$  Hz, 1H), 5.55 (s, 1H), 3.10 (s, 2H), 2.58 (s, 2H), 1.42 (s, 9H), 1.21 (s, 6H);  $^{13}\text{C NMR}$  (125 MHz,  $\text{CDCl}_3$ )  $\delta$  196.27, 168.23, 157.41, 152.31, 143.51, 129.75, 126.15, 125.56, 123.40, 117.49, 109.46, 75.26, 53.14, 37.78, 35.88, 32.37, 31.24, 28.35; HRMS (ESI-TOF)  $m/z$ :  $[\text{M}+\text{H}]^+$  calcd for  $\text{C}_{21}\text{H}_{24}\text{NO}_3$  338.1751; found 338.1750.

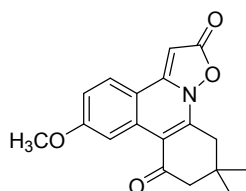

**6-Methoxy-10,10-dimethyl-10,11-dihydro-2H-isoxazolo[2,3-*f*]phenanthridine-2,8(9*H*)-dione (3ia).** The title compound was prepared from 3-(4-methoxyphenyl)isoxazol-5(4*H*)-one and 2-diazo-5,5-dimethylcyclohexane-1,3-dione according to the general procedures (synthesis of isoxazolo[2,3-*f*]phenanthridines) and purified by column chromatography (petroleum ether/ethyl acetate 3:1,  $R_f = 0.5$ ) to afford a yellow solid in 82% yield (64 mg); mp = 192-193 °C;  $^1\text{H NMR}$  (500 MHz,  $\text{CDCl}_3$ )  $\delta$  9.00 (d,  $J = 2.4$  Hz, 1H), 7.80–7.75 (m, 1H), 7.18–7.13 (m, 1H), 5.47 (s, 1H), 3.98 (s, 3H), 3.10 (s, 2H), 2.58 (s, 2H), 1.21 (s, 6H);  $^{13}\text{C NMR}$  (125 MHz,  $\text{CDCl}_3$ )  $\delta$  196.19, 168.22, 152.38, 144.49, 143.54, 129.73, 129.53, 126.86, 125.71, 117.52, 109.14, 75.26, 53.01, 37.71, 32.32, 28.31, 22.60; HRMS (ESI-TOF)  $m/z$ :  $[\text{M}+\text{H}]^+$  calcd for  $\text{C}_{18}\text{H}_{18}\text{NO}_4$  312.1230; found 312.1237.

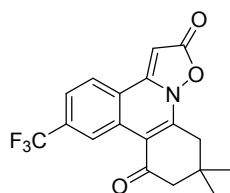

**10,10-Dimethyl-6-(trifluoromethyl)-10,11-dihydro-2H-isoxazolo[2,3-*f*]phenanthridine-2,8(9*H*)-**

**dione (3ja).** The title compound was prepared from 3-(4-(trifluoromethyl)phenyl)isoxazol-5(4*H*)-one and 2-diazo-5,5-dimethylcyclohexane-1,3-dione according to the general procedures (synthesis of isoxazolo[2,3-*f*]phenanthridines) and purified by column chromatography (petroleum ether/ethyl acetate 4:1,  $R_f = 0.5$ ) to afford a yellow solid in 73% yield (63 mg); mp = 206-207 °C;  $^1\text{H NMR}$  (500 MHz,  $\text{CDCl}_3$ )  $\delta$  9.81 (s, 1H), 8.00 (d,  $J = 8.4$  Hz, 1H), 7.78 (dd,  $J = 8.4, 1.4$  Hz, 1H), 5.69 (s, 1H), 3.13 (s, 2H), 2.61 (s, 2H), 1.23 (s, 6H);  $^{13}\text{C NMR}$  (125 MHz,  $\text{CDCl}_3$ )  $\delta$  195.58, 167.34, 151.46, 144.72, 135.03 (q,  $J_{\text{C-F}} = 32.6$  Hz), 129.82, 126.56, 124.65 (q,  $J_{\text{C-F}} = 4.3$  Hz), 124.08 (q,  $J_{\text{C-F}} = 3.1$  Hz), 122.43, 121.72, 108.52, 77.38, 52.63, 37.60, 32.25, 28.19;  $^{19}\text{F NMR}$  (471 MHz,  $\text{CDCl}_3$ )  $\delta$  -63.1; HRMS (ESI-TOF)  $m/z$ :  $[\text{M}+\text{H}]^+$  calcd for  $\text{C}_{18}\text{H}_{15}\text{F}_3\text{NO}_3$  350.0999; found 350.0994.

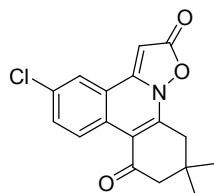

**5-chloro-10,10-dimethyl-10,11-dihydro-2H-isoxazolo[2,3-*f*]phenanthridine-2,8(9*H*)-dione (3ka).** The title compound was prepared from 3-(3-chlorophenyl)isoxazol-5(4*H*)-one and 2-diazo-5,5-dimethylcyclohexane-1,3-dione according to the general procedures (synthesis of isoxazolo[2,3-*f*]phenanthridines) and purified by column chromatography (petroleum ether/ethyl acetate 4:1,  $R_f = 0.5$ ) to afford a yellow solid in 52% yield (40 mg); mp = 216-217 °C;  $^1\text{H NMR}$  (500 MHz,  $\text{CDCl}_3$ )  $\delta$  9.40 (d,  $J = 9.1$  Hz, 1H), 7.85 (d,  $J = 2.2$  Hz, 1H), 7.71 (dd,  $J = 9.1, 2.2$  Hz, 1H), 5.60 (s, 1H), 3.10 (s, 2H), 2.58 (s, 2H), 1.22 (s, 6H);  $^{13}\text{C NMR}$  (125 MHz,  $\text{CDCl}_3$ )  $\delta$  195.78, 167.61, 151.33, 143.75, 134.00, 133.71, 128.95, 128.12, 124.98, 120.97, 108.78, 76.52, 52.81, 37.67, 32.34, 28.32; HRMS (ESI-TOF)  $m/z$ :  $[\text{M}+\text{H}]^+$  calcd for  $\text{C}_{17}\text{H}_{15}\text{ClNO}_3$  316.0735; found 316.0737.

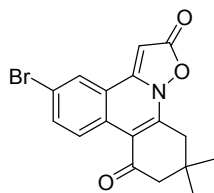

**5-bromo-10,10-dimethyl-10,11-dihydro-2H-isoxazolo[2,3-*f*]phenanthridine-2,8(9*H*)-dione (3la).** The title compound was prepared from 3-(3-bromophenyl)isoxazol-5(4*H*)-one and 2-diazo-5,5-dimethylcyclohexane-1,3-dione according to the general procedures (synthesis of isoxazolo[2,3-*f*]phenanthridines) and purified by column chromatography (petroleum ether/ethyl acetate 4:1,  $R_f = 0.5$ ) to afford a yellow solid in 54% yield (48 mg); mp = 217-218 °C;  $^1\text{H NMR}$  (500 MHz,  $\text{CDCl}_3$ )  $\delta$  9.32 (d,  $J = 9.1$  Hz, 1H), 8.00 (d,  $J = 2.1$  Hz, 1H), 7.84 (dd,  $J = 9.1, 2.2$  Hz, 1H), 5.60 (s, 1H), 3.09 (s, 2H), 2.58 (s, 2H), 1.21 (s, 6H);  $^{13}\text{C NMR}$  (125 MHz,  $\text{CDCl}_3$ )  $\delta$  195.76, 167.60, 151.23, 143.88, 136.51, 129.04, 128.50, 128.14, 121.97, 121.30, 108.84, 76.57, 52.86, 37.74, 32.37, 28.35; HRMS (ESI-TOF)  $m/z$ :  $[\text{M}+\text{H}]^+$  calcd for  $\text{C}_{17}\text{H}_{15}\text{BrNO}_3$  360.0230; found 360.0238.

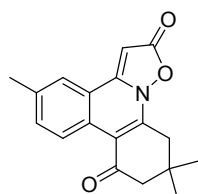

**5,10,10-Trimethyl-10,11-dihydro-2H-isoxazolo[2,3-*f*]phenanthridine-2,8(9*H*)-dione (3ma).** The title compound was prepared from 3-(*m*-tolyl)isoxazol-5(4*H*)-one and 2-diazo-5,5-

dimethylcyclohexane-1,3-dione according to the general procedures (synthesis of isoxazolo[2,3-*f*]phenanthridines) and purified by column chromatography (petroleum ether/ethyl acetate 4:1,  $R_f = 0.5$ ) to afford a yellow solid in 74% yield (54 mg); mp = 229-230 °C;  $^1\text{H NMR}$  (500 MHz,  $\text{CDCl}_3$ )  $\delta$  9.27 (d,  $J = 8.7$  Hz, 1H), 7.65–7.62 (m, 1H), 7.58 (dd,  $J = 8.6, 1.7$  Hz, 1H), 5.54 (s, 1H), 3.08 (s, 2H), 2.56 (s, 2H), 2.51 (s, 3H), 1.20 (s, 6H);  $^{13}\text{C NMR}$  (125 MHz,  $\text{CDCl}_3$ )  $\delta$  196.10, 168.20, 152.31, 142.79, 138.39, 135.04, 127.36, 127.03, 125.37, 119.88, 109.40, 75.49, 52.95, 37.62, 32.38, 28.35, 21.41; HRMS (ESI-TOF)  $m/z$ :  $[\text{M}+\text{H}]^+$  calcd for  $\text{C}_{18}\text{H}_{18}\text{NO}_3$  296.1281; found 296.1275.

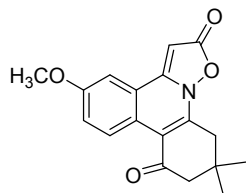

**5-Methoxy-10,10-dimethyl-10,11-dihydro-2H-isoxazolo[2,3-*f*]phenanthridine-2,8(9H)-dione**

**(3na).** The title compound was prepared from 3-(3-methoxyphenyl)isoxazol-5(4*H*)-one and 2-diazo-5,5-dimethylcyclohexane-1,3-dione according to the general procedures (synthesis of isoxazolo[2,3-*f*]phenanthridines) and purified by column chromatography (petroleum ether/ethyl acetate 3:1,  $R_f = 0.5$ ) to afford a yellow solid in 70% yield (54 mg); mp = 209-210 °C;  $^1\text{H NMR}$  (500 MHz,  $\text{CDCl}_3$ )  $\delta$  9.36 (d,  $J = 9.4$  Hz, 1H), 7.37 (dd,  $J = 9.4, 2.8$  Hz, 1H), 7.18 (d,  $J = 2.8$  Hz, 1H), 5.53 (s, 1H), 3.94 (s, 3H), 3.09 (s, 2H), 2.57 (s, 2H), 1.21 (s, 6H);  $^{13}\text{C NMR}$  (125 MHz,  $\text{CDCl}_3$ )  $\delta$  196.18, 168.21, 152.37, 144.49, 143.54, 129.73, 129.53, 126.85, 125.71, 117.51, 109.14, 75.26, 53.01, 37.71, 32.32, 28.31, 22.60; HRMS (ESI-TOF)  $m/z$ :  $[\text{M}+\text{H}]^+$  calcd for  $\text{C}_{18}\text{H}_{18}\text{NO}_4$  312.1230; found 312.1235.

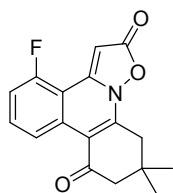

**4-Fluoro-10,10-dimethyl-10,11-dihydro-2H-isoxazolo[2,3-*f*]phenanthridine-2,8(9H)-dione**

**(3oa).** The title compound was prepared from 3-(2-fluorophenyl)isoxazol-5(4*H*)-one and 2-diazo-5,5-dimethylcyclohexane-1,3-dione according to the general procedures (synthesis of isoxazolo[2,3-*f*]phenanthridines) and purified by column chromatography (petroleum ether/ethyl acetate 4:1,  $R_f = 0.5$ ) to afford a yellow solid in 68% yield (50 mg); mp = 192-193 °C;  $^1\text{H NMR}$  (500 MHz,  $\text{CDCl}_3$ )  $\delta$  9.20 (d,  $J = 8.6$  Hz, 1H), 7.73–7.68 (m, 1H), 7.26–7.23 (m, 1H), 5.82 (d,  $J = 4.4$  Hz, 1H), 3.10 (s, 2H), 2.57 (s, 2H), 1.21 (s, 6H);  $^{13}\text{C NMR}$  (125 MHz,  $\text{CDCl}_3$ )  $\delta$  195.57, 167.88 (d,  $J_{\text{C-F}} = 3.0$  Hz), 161.21 (d,  $J_{\text{C-F}} = 254.7$  Hz), 147.90, 144.56, 134.18, 131.48, 122.65 (d,  $J_{\text{C-F}} = 3.7$  Hz), 113.80 (d,  $J_{\text{C-F}} = 19.2$  Hz), 110.26 (d,  $J_{\text{C-F}} = 13.3$  Hz), 108.39, 81.33 (d,  $J_{\text{C-F}} = 13.6$  Hz), 52.83, 37.81, 32.23, 28.32;  $^{19}\text{F NMR}$  (471 MHz,  $\text{CDCl}_3$ )  $\delta$  -110.4; HRMS (ESI-TOF)  $m/z$ :  $[\text{M}+\text{H}]^+$  calcd for  $\text{C}_{17}\text{H}_{15}\text{FNO}_3$  300.1030; found 300.1029.

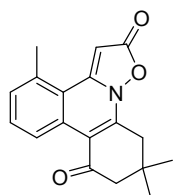

**4,10,10-Trimethyl-10,11-dihydro-2H-isoxazolo[2,3-*f*]phenanthridine-2,8(9H)-dione (3pa).** The



title compound was prepared from 3-(*o*-tolyl)isoxazol-5(4*H*)-one and 2-diazo-5,5-dimethylcyclohexane-1,3-dione according to the general procedures (synthesis of isoxazolo[2,3-*f*]phenanthridines) and purified by column chromatography (petroleum ether/ethyl acetate 4:1,  $R_f = 0.5$ ) to afford a yellow solid in 72% yield (52 mg); mp = 217-218 °C;  $^1\text{H NMR}$  (500 MHz,  $\text{CDCl}_3$ )  $\delta$  9.32 (d,  $J = 8.6$  Hz, 1H), 7.65–7.60 (m, 1H), 7.37 (d,  $J = 7.3$  Hz, 1H), 5.75 (s, 1H), 3.09 (s, 2H), 2.71 (s, 3H), 2.57 (s, 2H), 1.20 (s, 6H);  $^{13}\text{C NMR}$  (126 MHz,  $\text{CDCl}_3$ )  $\delta$  195.82, 167.77, 151.30, 143.51, 137.74, 132.65, 131.05, 130.66, 124.74, 120.03, 109.50, 81.41, 53.11, 37.90, 32.18, 28.34, 23.85; HRMS (ESI-TOF)  $m/z$ :  $[\text{M}+\text{H}]^+$  calcd for  $\text{C}_{18}\text{H}_{18}\text{NO}_3$  296.1281; found 296.1288.

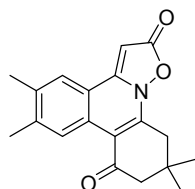

**5,6,10,10-Tetramethyl-10,11-dihydro-2H-isoxazolo[2,3-*f*]phenanthridine-2,8(9H)-dione (3qa).**

The title compound was prepared from 3-(3,4-dimethylphenyl)isoxazol-5(4*H*)-one and 2-diazo-5,5-dimethylcyclohexane-1,3-dione according to the general procedures (synthesis of isoxazolo[2,3-*f*]phenanthridines) and purified by column chromatography (petroleum ether/ethyl acetate 4:1,  $R_f = 0.5$ ) to afford a yellow solid in 53% yield (41 mg); mp = 225-226 °C;  $^1\text{H NMR}$  (500 MHz,  $\text{CDCl}_3$ )  $\delta$  9.19 (s, 1H), 7.62 (s, 1H), 5.52 (s, 1H), 3.09 (s, 2H), 2.57 (s, 2H), 2.46 (s, 3H), 2.42 (s, 3H), 1.20 (s, 6H);  $^{13}\text{C NMR}$  (125 MHz,  $\text{CDCl}_3$ )  $\delta$  196.17, 168.34, 152.29, 143.93, 142.83, 137.85, 127.88, 127.33, 125.87, 118.10, 109.31, 74.92, 53.07, 37.74, 32.40, 28.37, 20.99, 19.99; HRMS (ESI-TOF)  $m/z$ :  $[\text{M}+\text{H}]^+$  calcd for  $\text{C}_{19}\text{H}_{20}\text{NO}_3$  310.1438; found 310.1432.

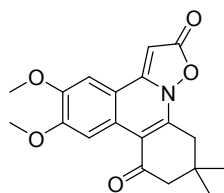

**5,6-Dimethoxy-10,10-dimethyl-10,11-dihydro-2H-isoxazolo[2,3-*f*]phenanthridine-2,8(9H)-dione (3ra).**

The title compound was prepared from 3-(3,4-dimethoxyphenyl)isoxazol-5(4*H*)-one and 2-diazo-5,5-dimethylcyclohexane-1,3-dione according to the general procedures (synthesis of isoxazolo[2,3-*f*]phenanthridines) and purified by column chromatography (petroleum ether/ethyl acetate 3:1,  $R_f = 0.5$ ) to afford a yellow solid in 48% yield (41 mg); mp = 170-171 °C;  $^1\text{H NMR}$  (500 MHz,  $\text{CDCl}_3$ )  $\delta$  10.34 (s, 1H), 8.98 (s, 1H), 8.72 (s, 1H), 4.10 (s, 3H), 4.09 (s, 3H), 3.28 (s, 2H), 2.71 (s, 2H), 1.19 (s, 6H);  $^{13}\text{C NMR}$  (125 MHz,  $\text{CDCl}_3$ )  $\delta$  196.12, 157.11, 155.53, 155.52, 151.85, 148.95, 133.25, 122.65, 120.96, 104.32, 103.53, 56.32, 56.20, 54.70, 47.52, 32.94, 28.23, 18.56; HRMS (ESI-TOF)  $m/z$ :  $[\text{M}+\text{H}]^+$  calcd for  $\text{C}_{19}\text{H}_{20}\text{NO}_5$  342.1336; found 342.1340.

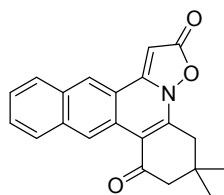

**6,6-dimethyl-6,7-dihydro-2H-benzol[j]isoxazolo[2,3-*f*]phenanthridine-2,8(5H)-dione (3sa).** The title compound was prepared from 3-(naphthalen-2-yl)isoxazol-5(4*H*)-one and 2-diazo-5,5-dimethylcyclohexane-1,3-dione according to the general procedures (synthesis of isoxazolo[2,3-

f]phenanthridines) and purified by column chromatography (petroleum ether/ethyl acetate 4:1,  $R_f = 0.5$ ) to afford a black solid in 63% yield (52 mg); mp = 228–229 °C;  $^1\text{H NMR}$  (500 MHz,  $\text{CDCl}_3$ )  $\delta$  9.97 (s, 1H), 8.44 (s, 1H), 8.08 (d,  $J = 8.5$  Hz, 1H), 7.99 (d,  $J = 8.2$  Hz, 1H), 7.67–7.58 (m, 2H), 5.81 (s, 1H), 3.12 (s, 2H), 2.63 (s, 2H), 1.24 (s, 6H);  $^{13}\text{C NMR}$  (125 MHz,  $\text{CDCl}_3$ )  $\delta$  196.24, 168.04, 152.93, 143.28, 136.29, 131.53, 129.50, 128.72, 128.13, 127.65, 127.11, 126.30, 124.94, 118.09, 108.92, 78.19, 53.01, 37.82, 32.39, 28.39; HRMS (ESI-TOF)  $m/z$ :  $[\text{M}+\text{H}]^+$  calcd for  $\text{C}_{21}\text{H}_{18}\text{NO}_3$  332.1281; found 332.1280.

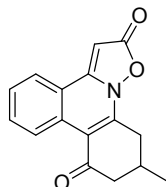

**10-Methyl-10,11-dihydro-2H-isoxazolo[2,3-f]phenanthridine-2,8(9H)-dione (3ab).** The title compound was prepared from 3-phenylisoxazol-5(4H)-one and 2-diazo-5-methylcyclohexane-1,3-dione according to the general procedures (synthesis of isoxazolo[2,3-f]phenanthridines) and purified by column chromatography (petroleum ether/ethyl acetate 4:1,  $R_f = 0.5$ ) to afford a yellow solid in 63% yield (42 mg); mp = 222–223 °C;  $^1\text{H NMR}$  (500 MHz,  $\text{CDCl}_3$ )  $\delta$  9.42 (d,  $J = 8.5$  Hz, 1H), 7.90–7.87 (m, 1H), 7.78 (ddd,  $J = 8.6, 7.2, 1.4$  Hz, 1H), 7.60–7.56 (m, 1H), 5.60 (s, 1H), 3.46–3.41 (m, 1H), 2.82–2.75 (m, 2H), 2.50–2.40 (m, 2H), 1.25 (d,  $J = 6.3$  Hz, 3H);  $^{13}\text{C NMR}$  (125 MHz,  $\text{CDCl}_3$ )  $\delta$  196.01, 168.05, 152.21, 144.51, 133.40, 129.78, 128.03, 127.24, 125.80, 119.74, 109.85, 75.94, 47.30, 32.00, 28.12, 21.01; HRMS (ESI-TOF)  $m/z$ :  $[\text{M}+\text{H}]^+$  calcd for  $\text{C}_{16}\text{H}_{14}\text{NO}_3$  268.0968; found 268.0974.

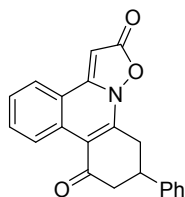

**10-phenyl-10,11-dihydro-2H-isoxazolo[2,3-f]phenanthridine-2,8(9H)-dione (3ac).** The title compound was prepared from 3-phenylisoxazol-5(4H)-one and 2-diazo-5-phenylcyclohexane-1,3-dione according to the general procedures (synthesis of isoxazolo[2,3-f]phenanthridines) and purified by column chromatography (petroleum ether/ethyl acetate 4:1,  $R_f = 0.5$ ) to afford a yellow solid in 58% yield (48 mg); mp = 191–192 °C;  $^1\text{H NMR}$  (500 MHz,  $\text{CDCl}_3$ )  $\delta$  9.46 (d,  $J = 8.5$  Hz, 1H), 7.90 (dd,  $J = 8.0, 1.2$  Hz, 1H), 7.82–7.78 (m, 1H), 7.62–7.58 (m, 1H), 7.43–7.39 (m, 2H), 7.35–7.31 (m, 3H), 5.61 (s, 1H), 3.73–3.58 (m, 2H), 3.31–3.23 (m, 1H), 3.05–2.94 (m, 2H);  $^{13}\text{C NMR}$  (125 MHz,  $\text{CDCl}_3$ )  $\delta$  195.18, 167.91, 152.40, 144.29, 141.38, 133.57, 129.82, 129.22, 128.24, 127.76, 127.44, 126.68, 125.90, 119.94, 110.02, 76.25, 46.00, 38.34, 31.70; HRMS (ESI-TOF)  $m/z$ :  $[\text{M}+\text{H}]^+$  calcd for  $\text{C}_{21}\text{H}_{16}\text{NO}_3$  330.1125; found 330.1126.

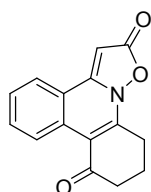

**10,11-Dihydro-2H-isoxazolo[2,3-f]phenanthridine-2,8(9H)-dione (3ad).** The title compound was prepared from 3-phenylisoxazol-5(4H)-one and 2-diazocyclohexane-1,3-dione according to the

general procedures (synthesis of isoxazolo[2,3-*f*]phenanthridines) and purified by column chromatography (petroleum ether/ethyl acetate 4:1,  $R_f = 0.5$ ) to afford a yellow solid in 54% yield (34 mg); mp = 225-226 °C;  $^1\text{H NMR}$  (500 MHz,  $\text{CDCl}_3$ )  $\delta$  9.40 (d,  $J = 8.6$  Hz, 1H), 7.87 (dd,  $J = 8.0, 1.2$  Hz, 1H), 7.79–7.74 (m, 1H), 7.60–7.55 (m, 1H), 5.58 (s, 1H), 3.24 (t,  $J = 6.3$  Hz, 2H), 2.75–2.69 (m, 2H), 2.27 (p,  $J = 6.4$  Hz, 2H);  $^{13}\text{C NMR}$  (125 MHz,  $\text{CDCl}_3$ )  $\delta$  195.87, 168.11, 152.29, 145.05, 133.45, 129.96, 128.08, 127.49, 125.84, 119.86, 110.31, 76.00, 39.22, 24.43, 20.55; HRMS (ESI-TOF)  $m/z$ :  $[\text{M}+\text{H}]^+$  calcd for  $\text{C}_{15}\text{H}_{12}\text{NO}_3$  254.0812; found 254.0806.

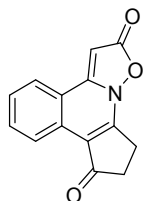

**9,10-Dihydrocyclopenta[*c*]isoxazolo[3,2-*a*]isoquinoline-2,8-dione (3ae).** The title compound was prepared from 3-phenylisoxazol-5(4*H*)-one and 2-diazocyclopentane-1,3-dione according to the general procedures (synthesis of isoxazolo[2,3-*f*]phenanthridines) and purified by column chromatography (petroleum ether/ethyl acetate 4:1,  $R_f = 0.5$ ) to afford a yellow solid in 46% yield (29 mg); mp = 191-192 °C;  $^1\text{H NMR}$  (500 MHz,  $\text{CDCl}_3$ )  $\delta$  8.87 (d,  $J = 8.2$  Hz, 1H), 7.94–7.92 (m, 1H), 7.82–7.78 (m, 1H), 7.64–7.60 (m, 1H), 5.68 (s, 1H), 3.31–3.28 (m, 2H), 2.87–2.85 (m, 2H);  $^{13}\text{C NMR}$  (125 MHz,  $\text{CDCl}_3$ )  $\delta$  199.62, 168.15, 154.23, 153.53, 133.48, 128.65, 128.37, 126.23, 124.63, 120.46, 114.55, 35.04, 22.04; HRMS (ESI-TOF)  $m/z$ :  $[\text{M}+\text{H}]^+$  calcd for  $\text{C}_{14}\text{H}_{10}\text{NO}_3$  240.0655; found 240.0653.

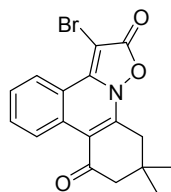

**3-Bromo-10,10-dimethyl-10,11-dihydro-2H-isoxazolo[2,3-*f*]phenanthridine-2,8(9H)-dione (4).** The title compound was prepared from isoxazolo[2,3-*f*]phenanthridines and pyridinium tribromide according to the general procedures (synthesis of 3-bromo-isoxazolo[2,3-*f*]phenanthridines) and purified by column chromatography (petroleum ether/ethyl acetate 8:1,  $R_f = 0.5$ ) to afford a brown solid in 78% yield (272 mg); mp = 170-171 °C;  $^1\text{H NMR}$  (500 MHz,  $\text{CDCl}_3$ )  $\delta$  9.42 (d,  $J = 8.6$  Hz, 1H), 8.93 (d,  $J = 8.2$  Hz, 1H), 7.81–7.77 (m, 1H), 7.63–7.58 (m, 1H), 3.08 (s, 2H), 2.58 (s, 2H), 1.21 (s, 6H);  $^{13}\text{C NMR}$  (125 MHz,  $\text{CDCl}_3$ )  $\delta$  195.71, 164.33, 146.09, 143.29, 133.63, 130.20, 127.72, 126.88, 125.61, 120.14, 109.49, 52.87, 37.41, 32.30, 28.32; HRMS (ESI-TOF)  $m/z$ :  $[\text{M}+\text{H}]^+$  calcd for  $\text{C}_{17}\text{H}_{15}\text{BrNO}_3$  360.0230; found 360.0233.

## 12. X-ray crystallographic data of compound **3aa**

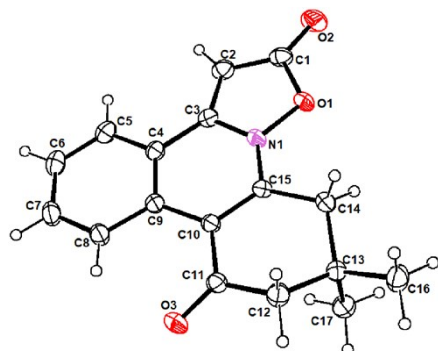

The purified compound **3aa** is dissolved in a mixed solvent of dichloromethane and *n*-hexane, and placed in a dark cabinet to slowly evaporate. After several days, a colourless bulk crystal is obtained. The X-ray crystal-structure determinations were obtained on a Bruker Smart CCD APEX-2 diffractometer (graphite-monochromated Mo *K* $\alpha$  radiation,  $\lambda=0.71073$  nm) at 293(2) K.

**Figure S1.** ORTEP drawing of compound **3aa** (30% probability for the thermal ellipsoid).

**Table S1.** Crystal data and structure refinement for compound **3aa**.

|                                   |                                                                                                                            |
|-----------------------------------|----------------------------------------------------------------------------------------------------------------------------|
| CCDC number                       | 2045428                                                                                                                    |
| Identification code               | 20190520a                                                                                                                  |
| Empirical formula                 | C <sub>17</sub> H <sub>15</sub> NO <sub>3</sub>                                                                            |
| Formula weight                    | 281.30                                                                                                                     |
| Temperature                       | 293.15 K                                                                                                                   |
| Wavelength                        | 0.71073 Å                                                                                                                  |
| Crystal system                    | triclinic                                                                                                                  |
| Space group                       | P-1                                                                                                                        |
| Unit cell dimensions              | a = 5.6716(5) Å $\alpha$ = 71.977(4)°<br>b = 11.2488(11) Å $\beta$ = 78.405(4)°<br>c = 11.2777(10) Å $\gamma$ = 83.699(4)° |
| Volume                            | 669.34(11) Å <sup>3</sup>                                                                                                  |
| Z                                 | 2                                                                                                                          |
| Density (calculated)              | 1.396 Mg/m <sup>3</sup>                                                                                                    |
| Absorption coefficient            | 0.096 mm <sup>-1</sup>                                                                                                     |
| F(000)                            | 296.0                                                                                                                      |
| Crystal size                      | 0.23 × 0.21 × 0.2 mm <sup>3</sup>                                                                                          |
| Theta range for data collection   | 1.908 to 27.926°                                                                                                           |
| Index ranges                      | -7 ≤ h ≤ 7, -14 ≤ k ≤ 14, -14 ≤ l ≤ 14                                                                                     |
| Reflections collected             | 20030                                                                                                                      |
| Independent reflections           | 3082 [R(int) = 0.0308]                                                                                                     |
| Completeness to theta = 25.242°   | 99.5%                                                                                                                      |
| Refinement method                 | Full-matrix least-squares on F <sup>2</sup>                                                                                |
| Data / restraints / parameters    | 3082 / 0 / 192                                                                                                             |
| Goodness-of-fit on F <sup>2</sup> | 1.036                                                                                                                      |
| Final R indices [I > 2σ(I)]       | R1 = 0.0429, wR2 = 0.1052                                                                                                  |
| R indices (all data)              | R1 = 0.0588, wR2 = 0.1145                                                                                                  |
| Largest diff. peak and hole       | 0.24 and -0.17 e.Å <sup>-3</sup>                                                                                           |

13. <sup>1</sup>H, <sup>13</sup>C and/or <sup>19</sup>F NMR spectra for all compounds

10,10-Dimethyl-10,11-dihydro-2H-isoxazolo[2,3-f]phenanthridine-2,8(9H)-dione (Table 2, compound 3aa)

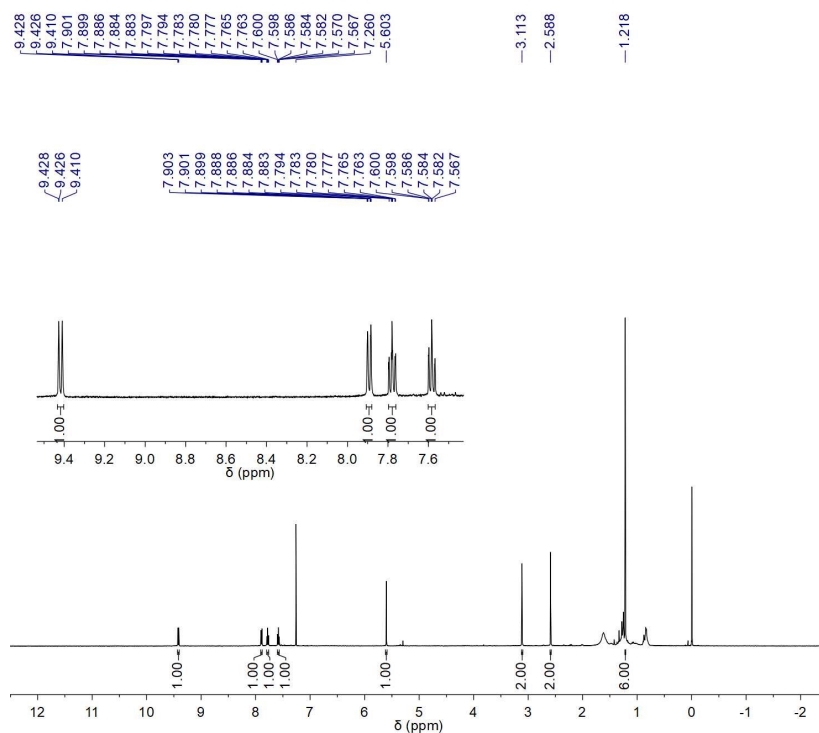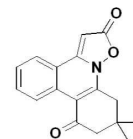

| Parameter                  | Value                                       |
|----------------------------|---------------------------------------------|
| 1 Title                    | 2020-1-syj-H.217.fid                        |
| 2 Origin                   | Bruker BioSpin GmbH                         |
| 3 Owner                    | nmrsu                                       |
| 4 Instrument               | spect                                       |
| 5 Solvent                  | CDCl3                                       |
| 6 Temperature              | 297.4                                       |
| 7 Pulse Sequence           | zg30                                        |
| 8 Experiment               | 1D                                          |
| 9 Probe                    | Z119470_0117 (PA BBO 500S1 BBF-H-D-05 Z SP) |
| 10 Number of Scans         | 2                                           |
| 11 Receiver Gain           | 188.8                                       |
| 12 Relaxation Delay        | 2.0000                                      |
| 13 Pulse Width             | 12.0000                                     |
| 14 Presaturation Frequency |                                             |
| 15 Acquisition Time        | 1.8175                                      |
| 16 Acquisition Date        | 2020-07-10T09:34:21                         |
| 17 Modification Date       | 2020-07-10T09:34:22                         |
| 18 Spectrometer Frequency  | 500.16                                      |
| 19 Spectral Width          | 9014.4                                      |
| 20 Lowest Frequency        | -1517.9                                     |
| 21 Nucleus                 | <sup>1</sup> H                              |
| 22 Acquired Size           | 16384                                       |
| 23 Spectral Size           | 65536                                       |

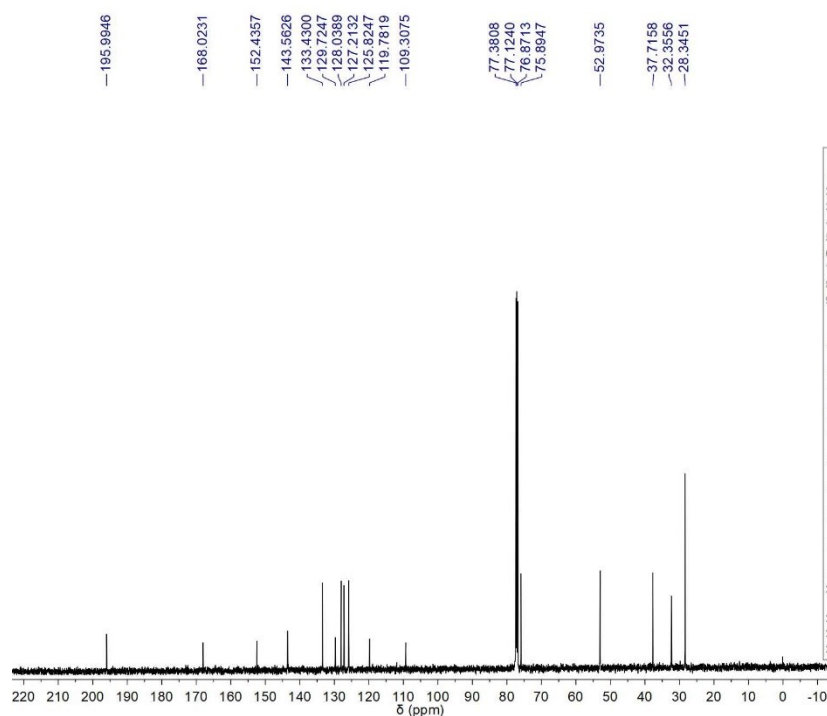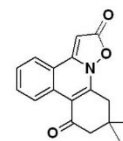

| Parameter                  | Value                                       |
|----------------------------|---------------------------------------------|
| 1 Title                    | 2020-1-syj-C.28.fid                         |
| 2 Origin                   | Bruker BioSpin GmbH                         |
| 3 Owner                    | nmrsu                                       |
| 4 Instrument               | spect                                       |
| 5 Solvent                  | CDCl3                                       |
| 6 Temperature              | 295.8                                       |
| 7 Pulse Sequence           | zgpg30                                      |
| 8 Experiment               | 1D                                          |
| 9 Probe                    | Z119470_0117 (PA BBO 500S1 BBF-H-D-05 Z SP) |
| 10 Number of Scans         | 200                                         |
| 11 Receiver Gain           | 188.8                                       |
| 12 Relaxation Delay        | 2.0000                                      |
| 13 Pulse Width             | 10.0000                                     |
| 14 Presaturation Frequency |                                             |
| 15 Acquisition Time        | 0.5505                                      |
| 16 Acquisition Date        | 2020-05-25T10:35:19                         |
| 17 Modification Date       | 2020-05-25T10:35:22                         |
| 18 Spectrometer Frequency  | 125.78                                      |
| 19 Spectral Width          | 29761.9                                     |
| 20 Lowest Frequency        | -1627.5                                     |
| 21 Nucleus                 | <sup>13</sup> C                             |
| 22 Acquired Size           | 16384                                       |
| 23 Spectral Size           | 65536                                       |

**6-Fluoro-10,10-dimethyl-10,11-dihydro-2H-isoxazolo[2,3-f]phenanthridine-2,8(9H)-dione**  
(Table 2, compound 3ba)

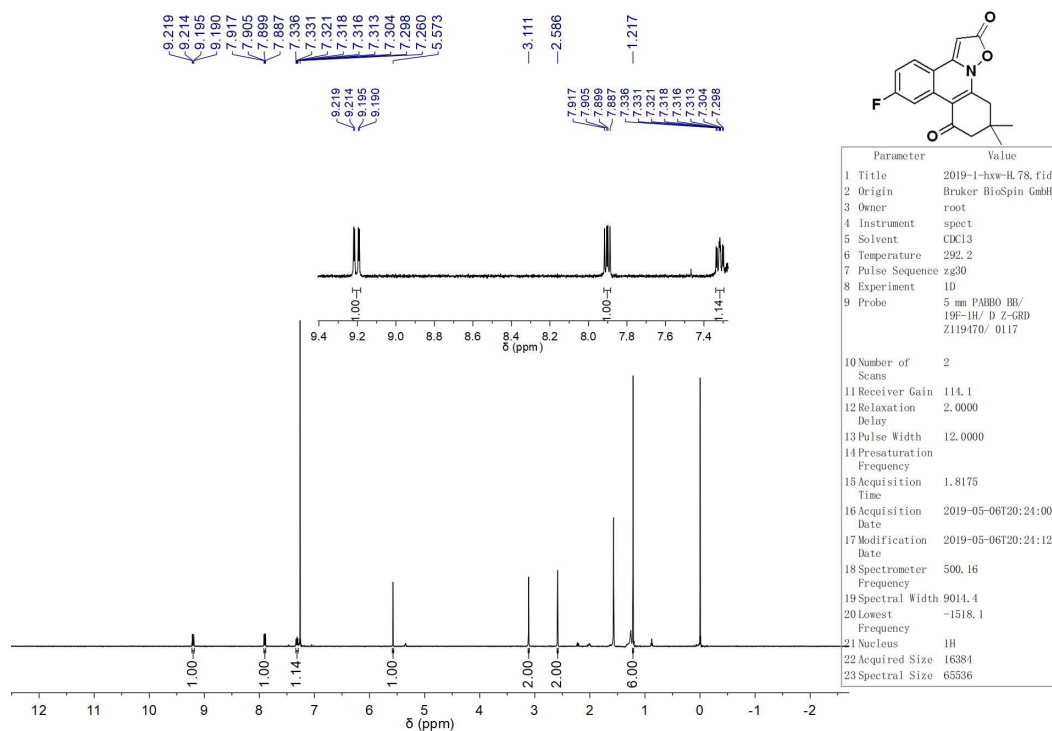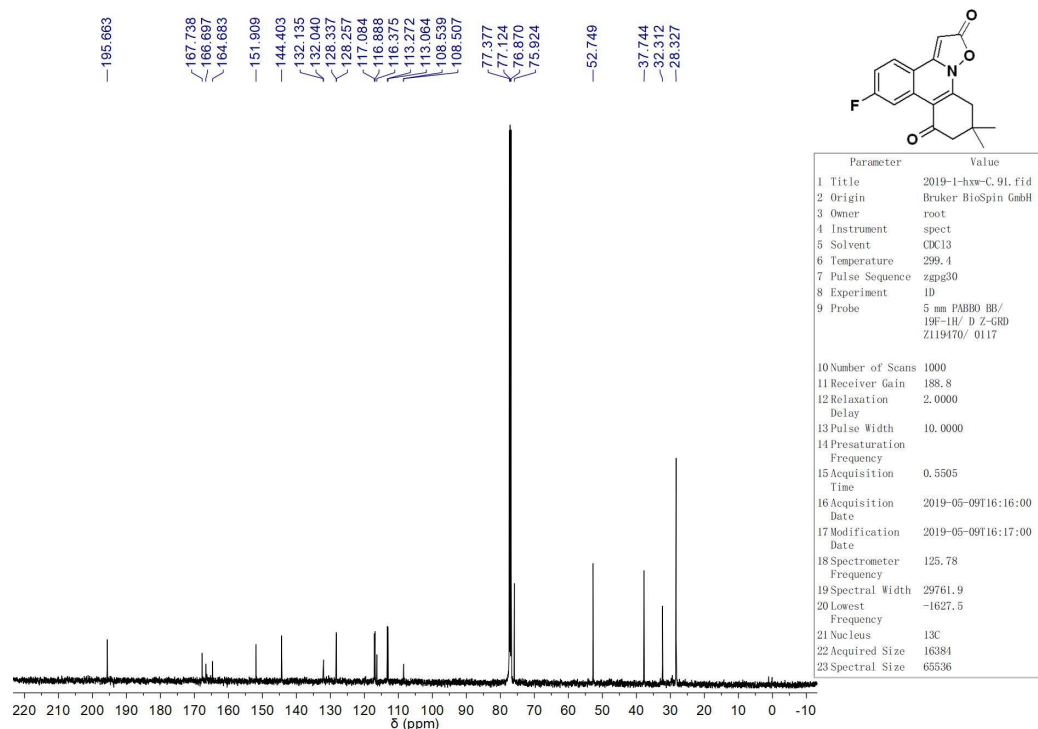

---102.034

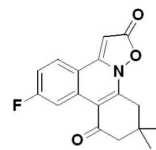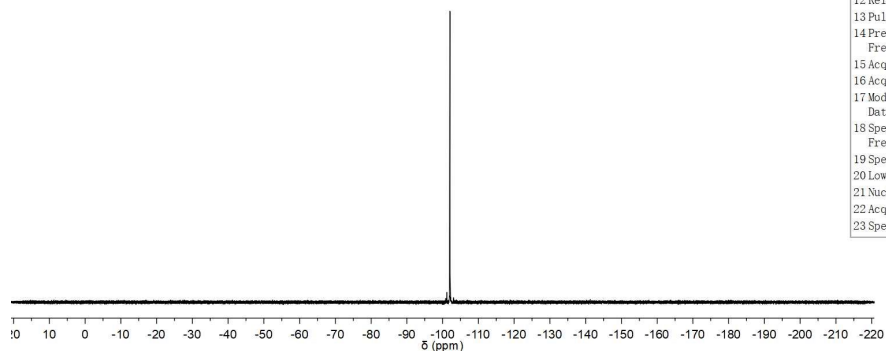

| Parameter           | Value                                           |
|---------------------|-------------------------------------------------|
| 1 Title             | 2019-1-hxw-F. 16. fid                           |
| 2 Origin            | Bruker BioSpin GmbH                             |
| 3 Owner             | root                                            |
| 4 Instrument        | spect                                           |
| 5 Solvent           | CDCl3                                           |
| 6 Temperature       | 297.0                                           |
| 7 Pulse Sequence    | zgfgqn                                          |
| 8 Experiment        | 1D                                              |
| 9 Probe             | 5 mm PABBO BB/ 19F-1H/<br>D 2-GRD Z119470/ 0117 |
| 10 Number of Scans  | 16                                              |
| 11 Receiver Gain    | 188.8                                           |
| 12 Relaxation Delay | 1.0000                                          |
| 13 Pulse Width      | 15.0000                                         |
| 14 Presaturation    | Frequency                                       |
| 15 Acquisition Time | 0.5767                                          |
| 16 Acquisition Date | 2019-05-09T17:45:00                             |
| 17 Modification     | 2019-05-09T17:46:00<br>Date                     |
| 18 Spectrometer     | 470.57<br>Frequency                             |
| 19 Spectral Width   | 113636.4                                        |
| 20 Lowest Frequency | -103879.4                                       |
| 21 Nucleus          | 19F                                             |
| 22 Acquired Size    | 65536                                           |
| 23 Spectral Size    | 131072                                          |

**6-Chloro-10,10-dimethyl-10,11-dihydro-2H-isoxazolo[2,3-f]phenanthridine-2,8(9H)-dione**  
**(Table 2, compound 3ca)**

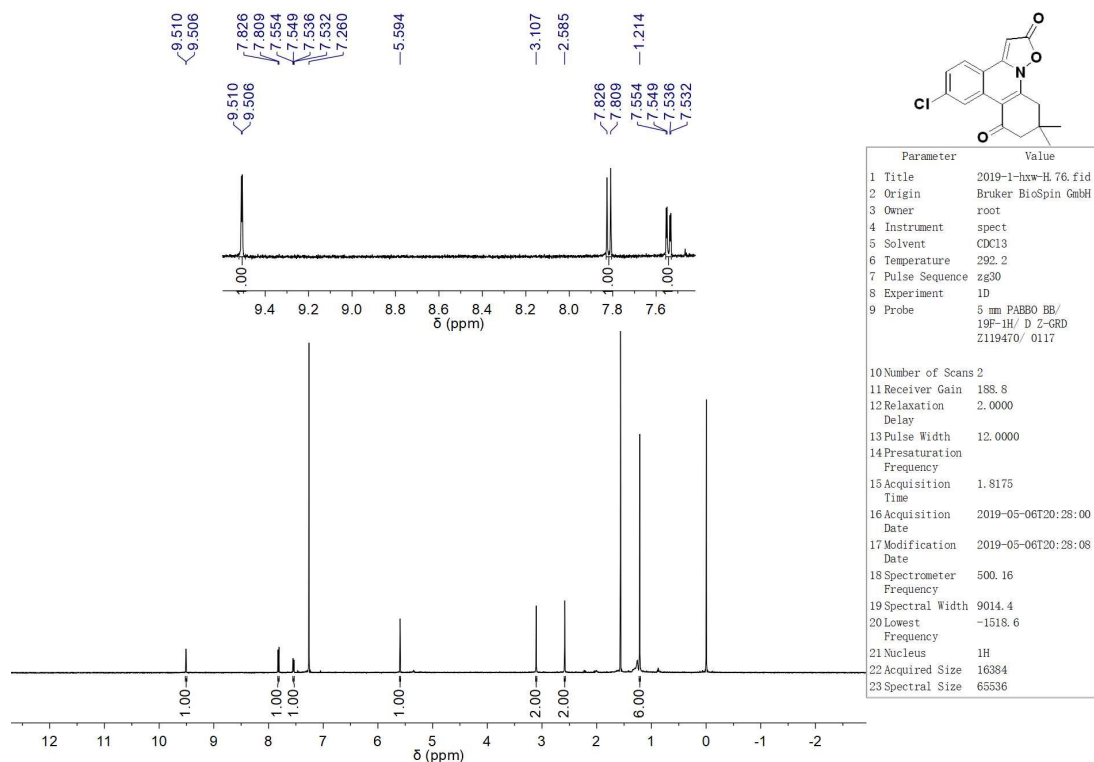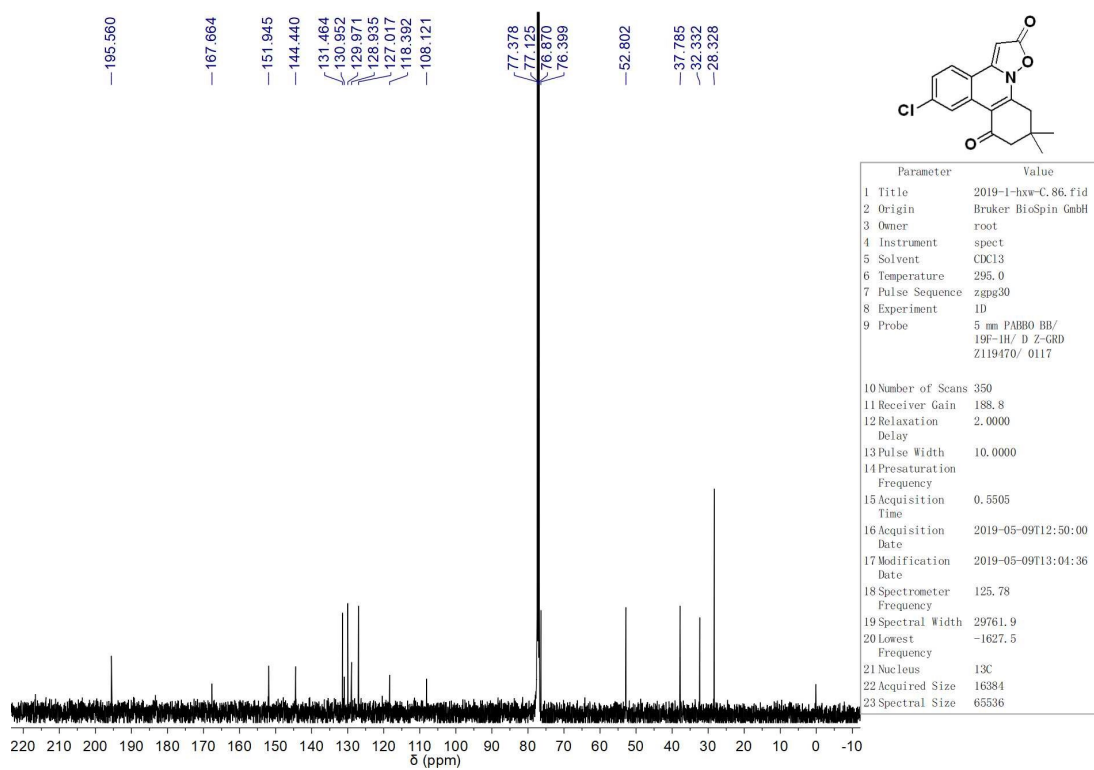



**6-Bromo-10,10-dimethyl-10,11-dihydro-2H-isoxazolo[2,3-f]phenanthridine-2,8(9H)-dione**  
 (Table 2, compound 3da)

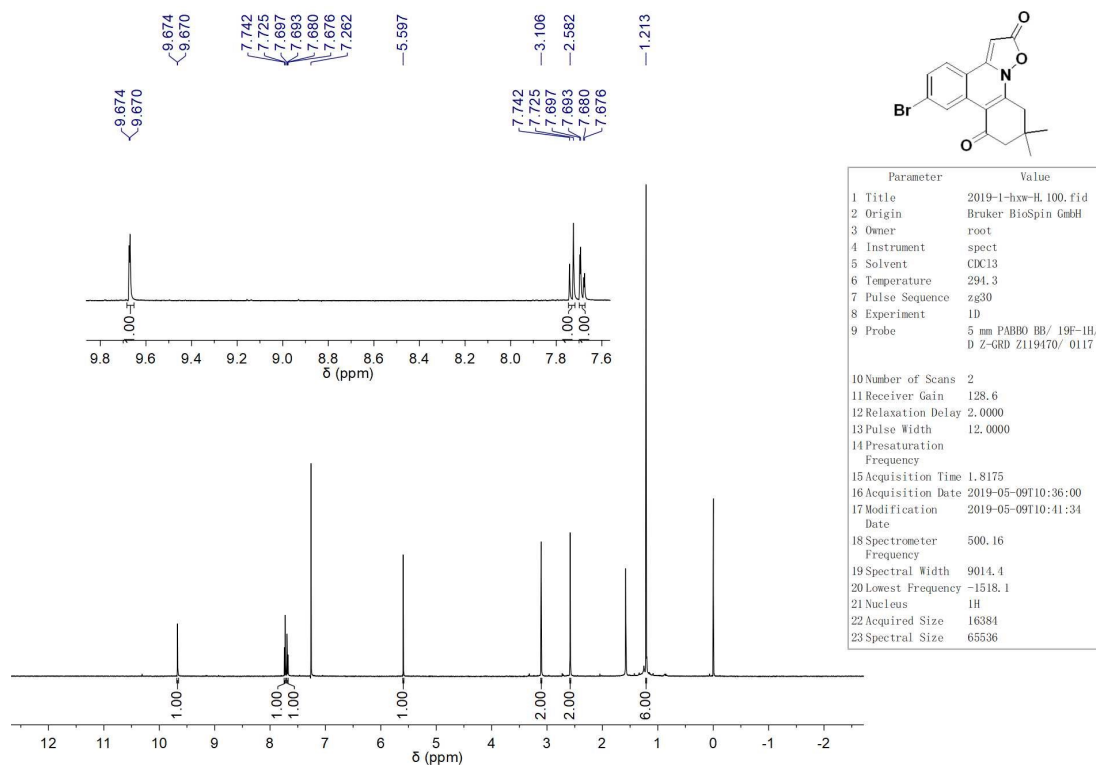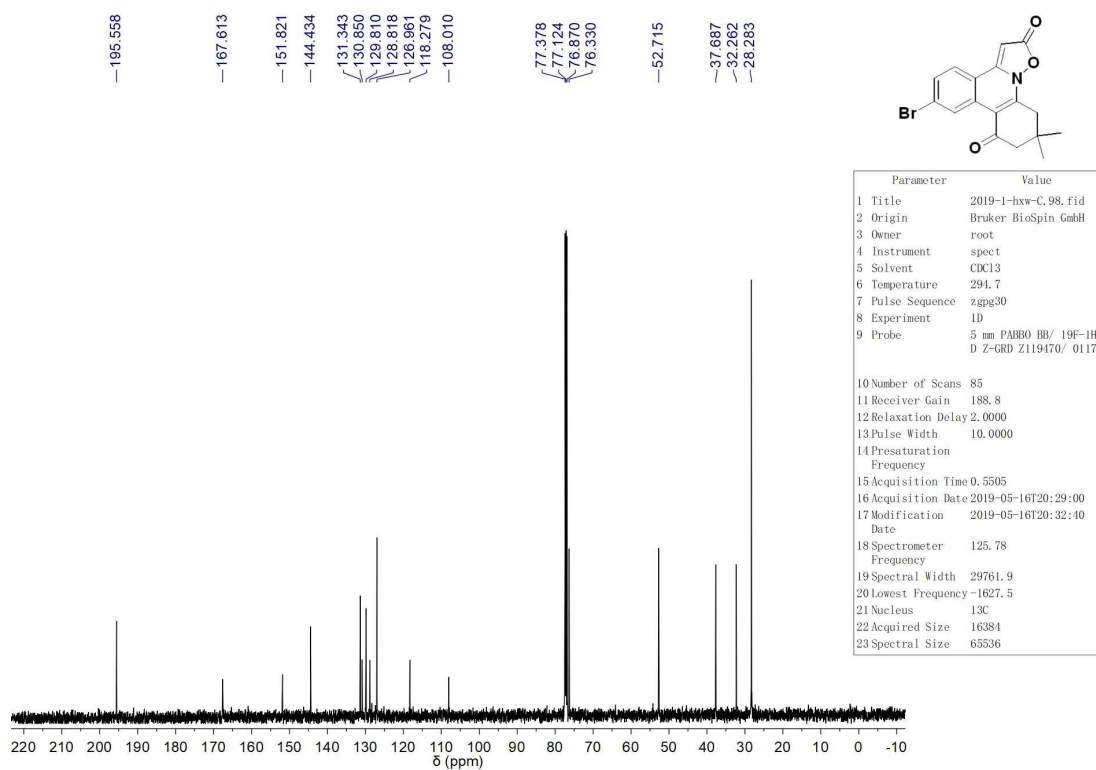

**6,10,10-Trimethyl-10,11-dihydro-2H-isoxazolo[2,3-f]phenanthridine-2,8(9H)-dione (Table 2, compound 3ea)**

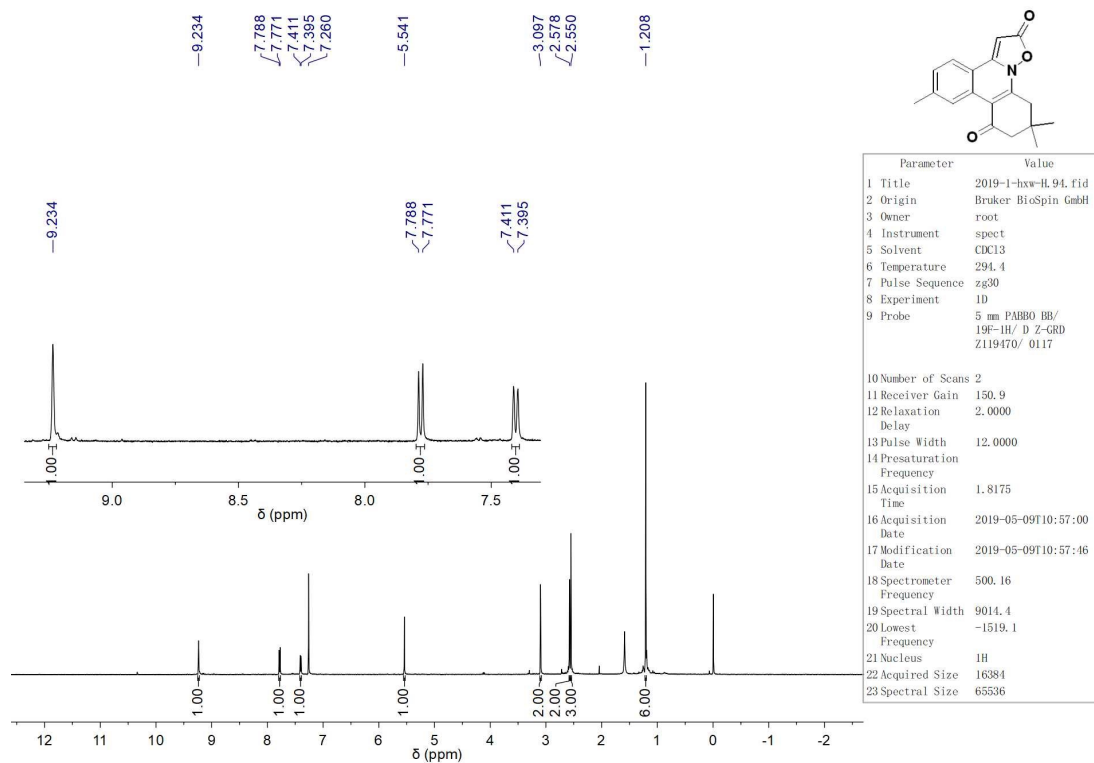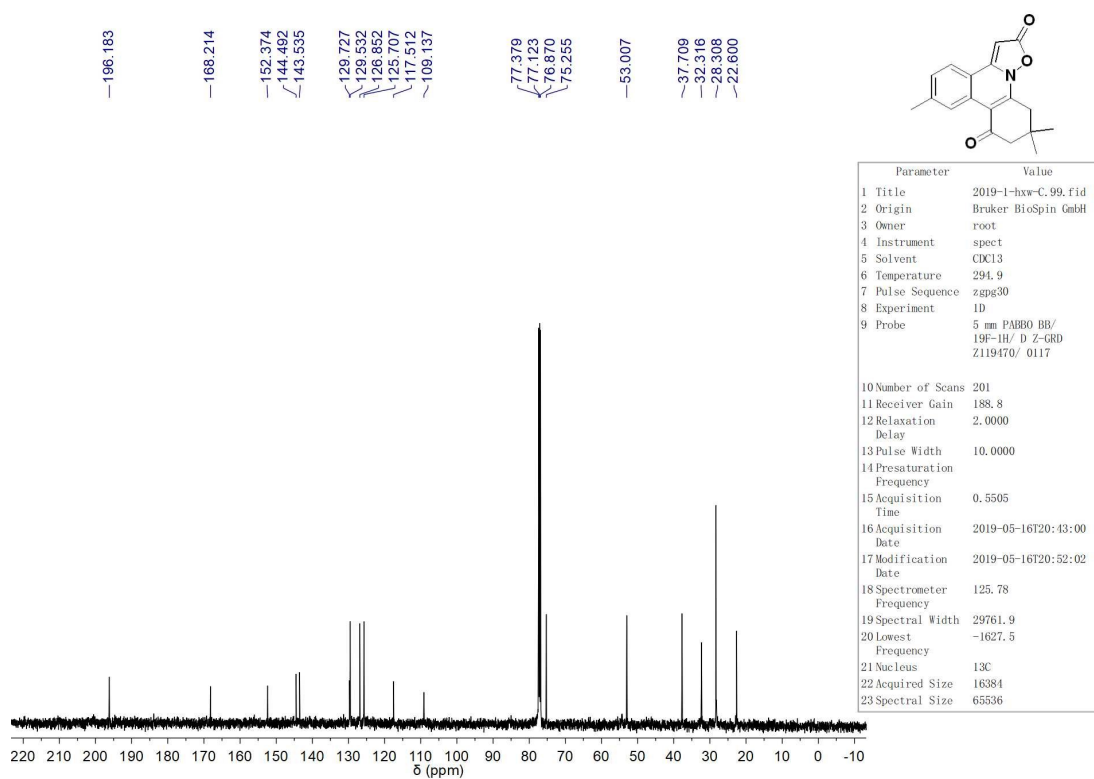

**6-Ethyl-10,10-dimethyl-10,11-dihydro-2H-isoxazolo[2,3-f]phenanthridine-2,8(9H)-dione (Table 2, compound 3fa)**

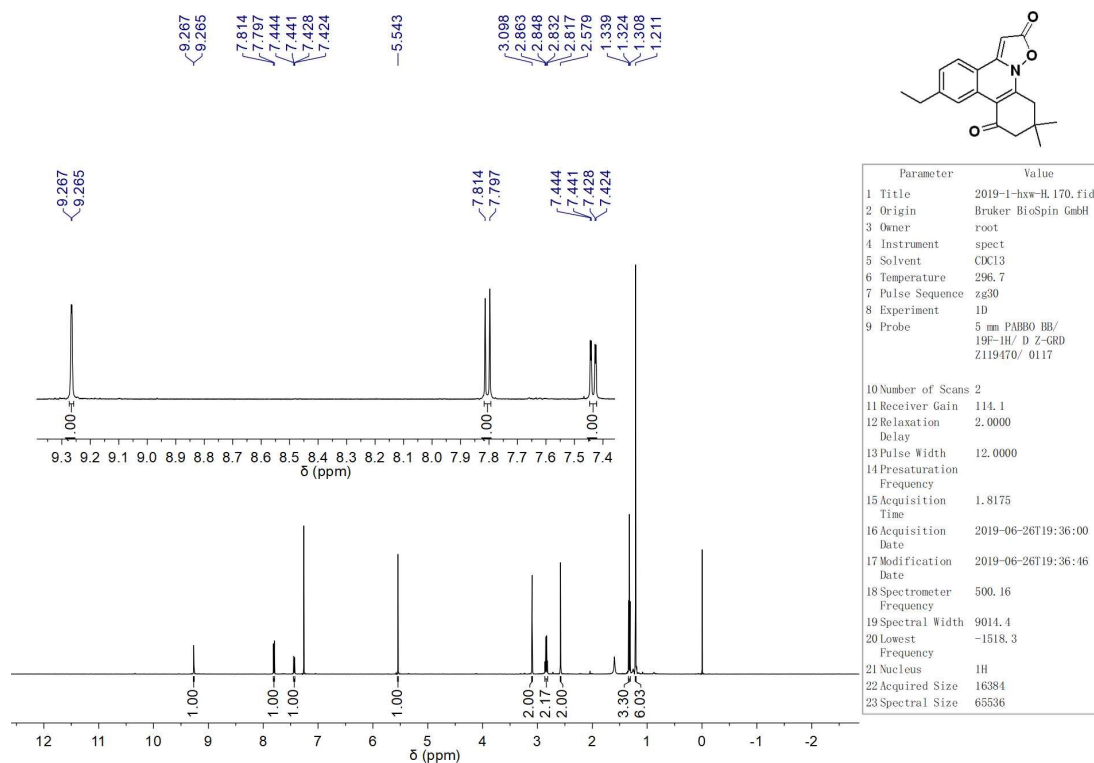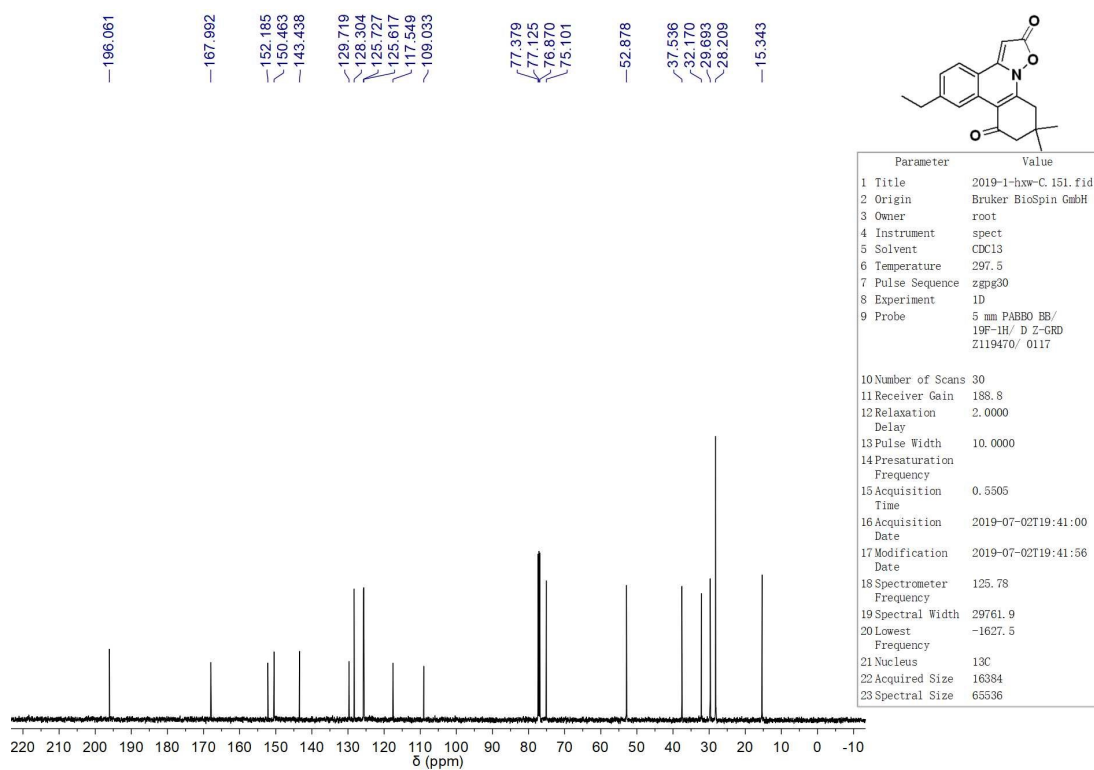

**6-Isopropyl-10,10-dimethyl-10,11-dihydro-2H-isoxazolo[2,3-f]phenanthridine-2,8(9H)-dione**  
 (Table 2, compound 3ga)

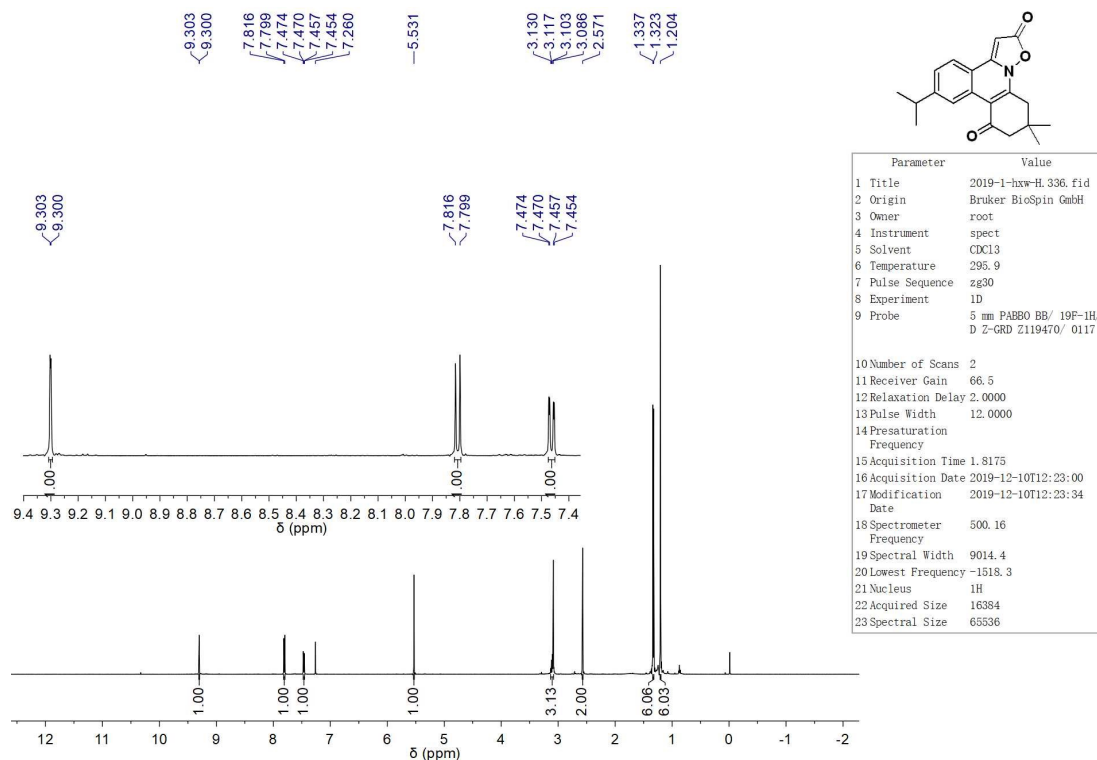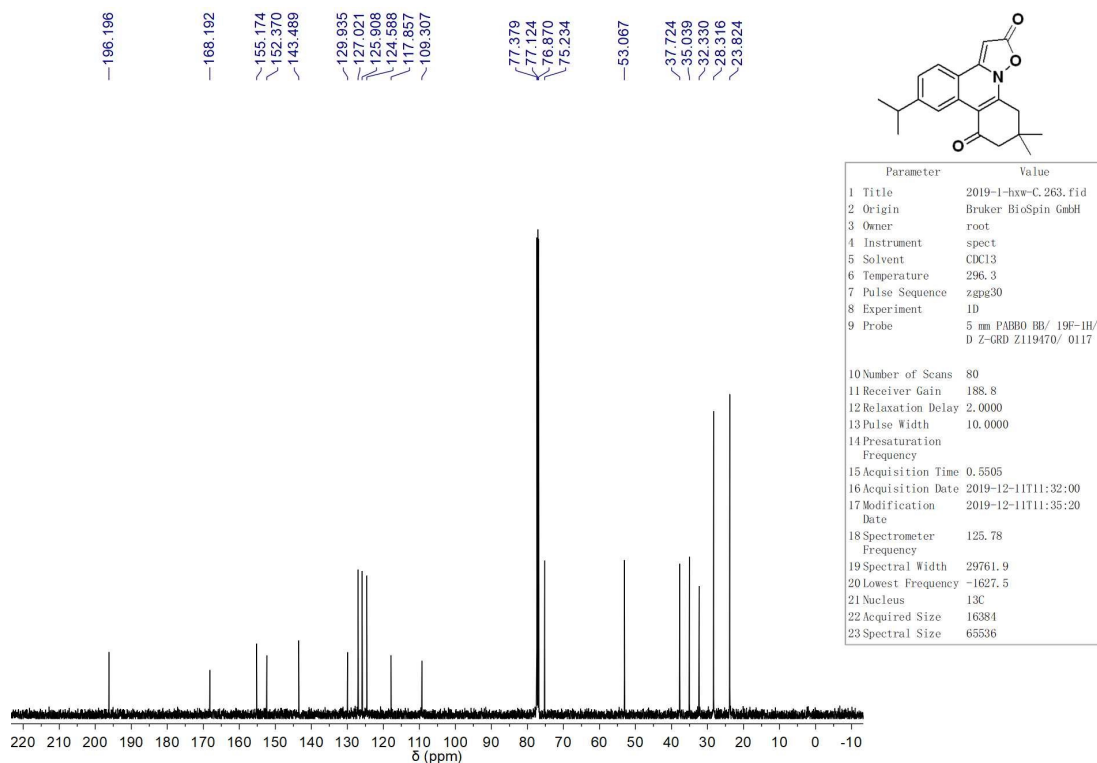

**6-(tert-Butyl)-10,10-dimethyl-10,11-dihydro-2H-isoxazolo[2,3-f]phenanthridine-2,8(9H)-dione**  
 (Table 2, compound 3ha)

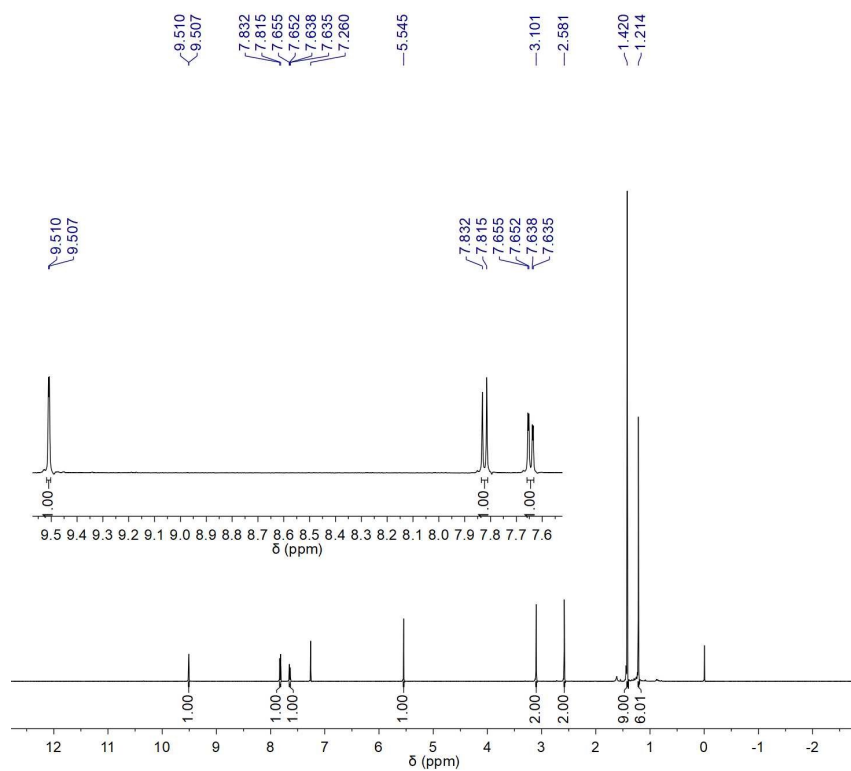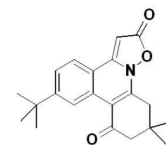

| Parameter           | Value                                       |
|---------------------|---------------------------------------------|
| 1 Title             | 2019-1-hxw-H, 283, fid                      |
| 2 Origin            | Bruker BioSpin GmbH                         |
| 3 Owner             | root                                        |
| 4 Instrument        | spect                                       |
| 5 Solvent           | CDCl3                                       |
| 6 Temperature       | 297.9                                       |
| 7 Pulse Sequence    | zg30                                        |
| 8 Experiment        | 1D                                          |
| 9 Probe             | Z119470_0117 (PA BBO 500S1 BBF-H-D-05 Z SP) |
| 10 Number of Scans  | 2                                           |
| 11 Receiver Gain    | 108.7                                       |
| 12 Relaxation Delay | 2.0000                                      |
| 13 Pulse Width      | 12.0000                                     |
| 14 Presaturation    | Frequency                                   |
| 15 Acquisition Time | 1.8175                                      |
| 16 Acquisition Date | 2019-10-15T10:47:11                         |
| 17 Modification     | 2019-10-15T10:47:12                         |
| 18 Spectrometer     | 500.16                                      |
| 19 Frequency        | Frequency                                   |
| 20 Spectral Width   | 9014.4                                      |
| 21 Lowest Frequency | -1518.3                                     |
| 22 Nucleus          | 1H                                          |
| 23 Acquired Size    | 16384                                       |
| 24 Spectral Size    | 65536                                       |

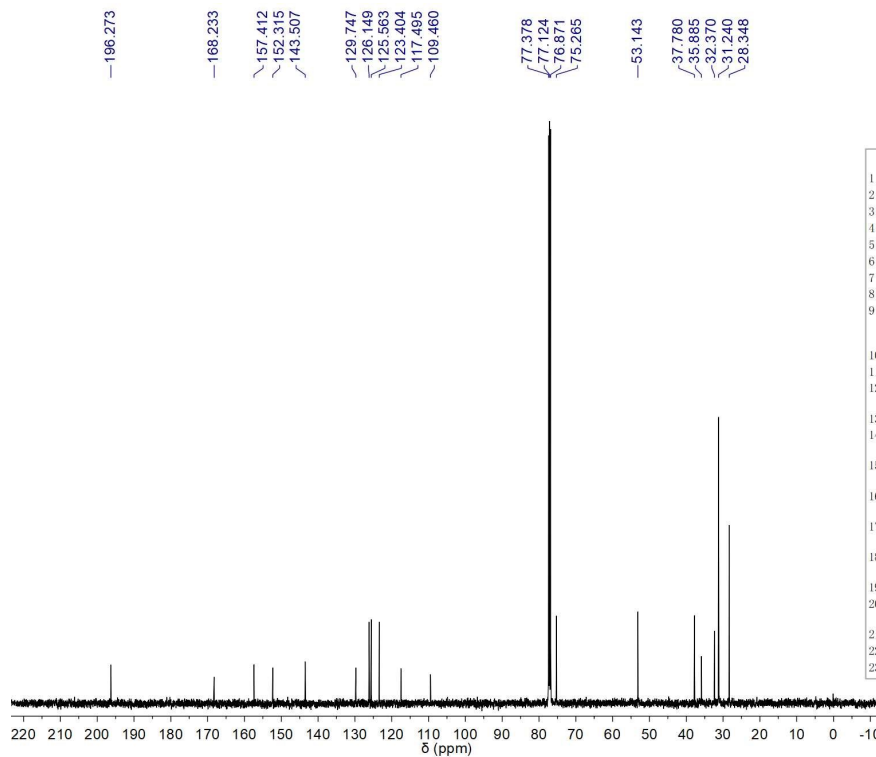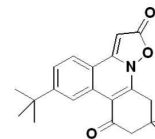

| Parameter          | Value                                       |
|--------------------|---------------------------------------------|
| 1 Title            | 2019-1-hxw-C, 233, fid                      |
| 2 Origin           | Bruker BioSpin GmbH                         |
| 3 Owner            | root                                        |
| 4 Instrument       | spect                                       |
| 5 Solvent          | CDCl3                                       |
| 6 Temperature      | 298.4                                       |
| 7 Pulse Sequence   | zgpg30                                      |
| 8 Experiment       | 1D                                          |
| 9 Probe            | Z119470_0117 (PA BBO 500S1 BBF-H-D-05 Z SP) |
| 10 Number of Scans | 220                                         |
| 11 Receiver Gain   | 188.8                                       |
| 12 Relaxation      | 2.0000                                      |
| 13 Delay           | Delay                                       |
| 14 Pulse Width     | 10.0000                                     |
| 15 Presaturation   | Frequency                                   |
| 16 Acquisition     | 0.5505                                      |
| 17 Time            | Time                                        |
| 18 Acquisition     | 2019-10-15T10:58:41                         |
| 19 Date            | Date                                        |
| 20 Modification    | 2019-10-15T10:58:44                         |
| 21 Date            | Date                                        |
| 22 Spectrometer    | 125.78                                      |
| 23 Frequency       | Frequency                                   |
| 24 Spectral Width  | 29761.9                                     |
| 25 Lowest          | -1627.5                                     |
| 26 Frequency       | Frequency                                   |
| 27 Nucleus         | 13C                                         |
| 28 Acquired Size   | 16384                                       |
| 29 Spectral Size   | 65536                                       |

**6-Methoxy-10,10-dimethyl-10,11-dihydro-2H-isoxazolo[2,3-f]phenanthridine-2,8(9H)-dione**  
(Table 2, compound 3ia)

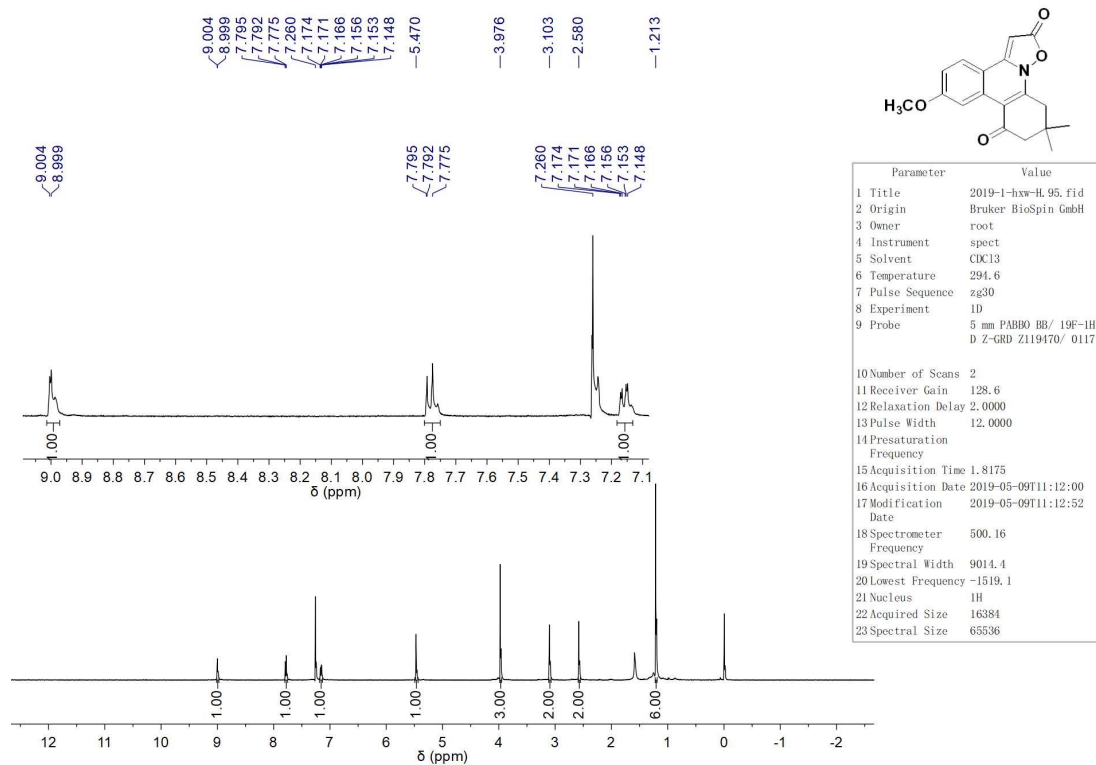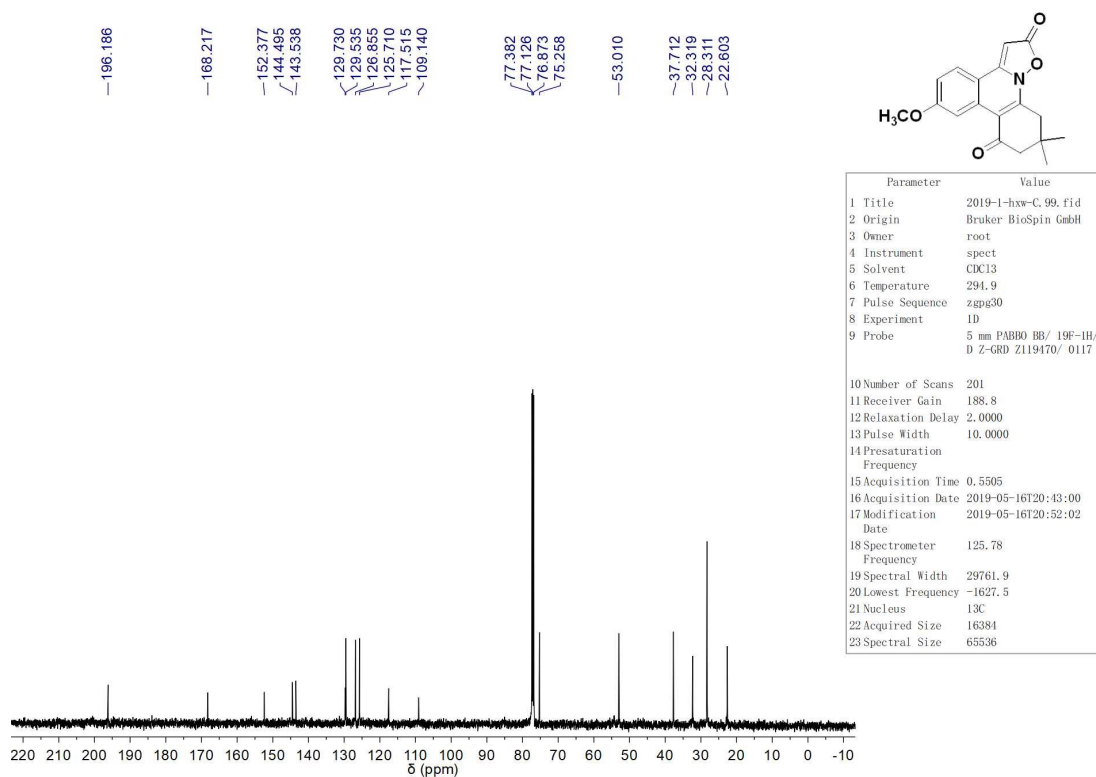

**10,10-Dimethyl-6-(trifluoromethyl)-10,11-dihydro-2H-isoxazolo[2,3-f]phenanthridine-2,8(9H)-dione (Table 2, compound 3ja)**

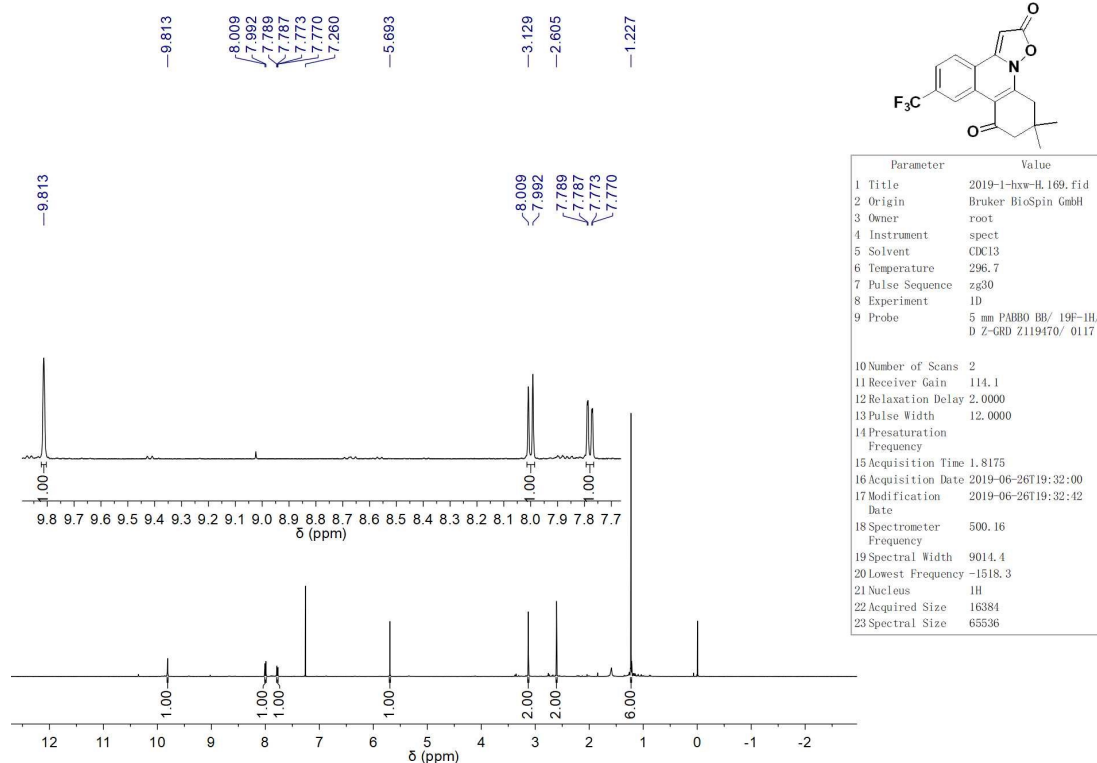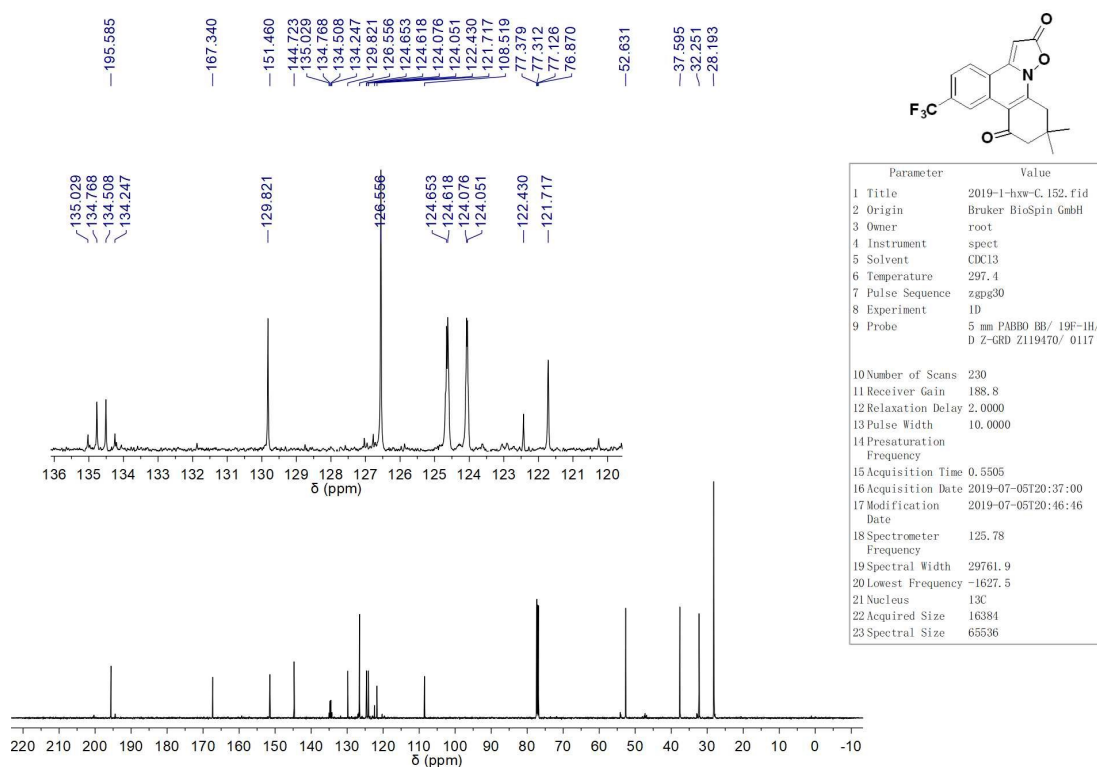

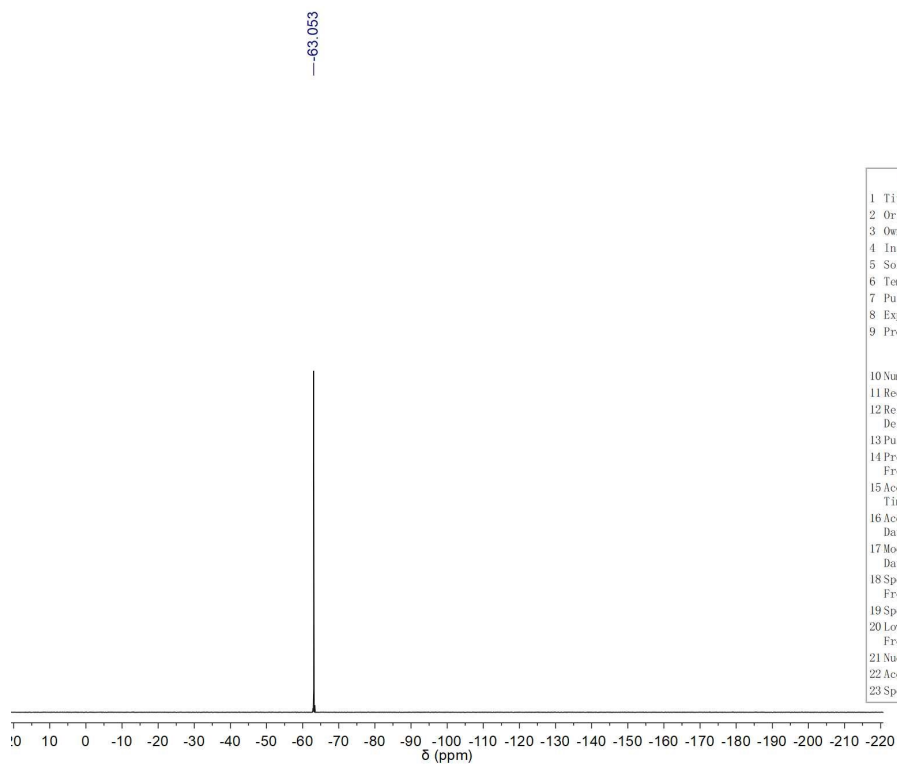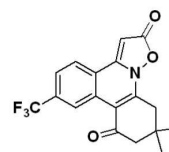

| Parameter                     | Value                                             |
|-------------------------------|---------------------------------------------------|
| 1 Title                       | 2020-1-syj-F_18.fid                               |
| 2 Origin                      | Bruker BioSpin GmbH                               |
| 3 Owner                       | nmsu                                              |
| 4 Instrument                  | spect                                             |
| 5 Solvent                     | CDCl3                                             |
| 6 Temperature                 | 296.4                                             |
| 7 Pulse Sequence              | zgfgq                                             |
| 8 Experiment                  | 1d                                                |
| 9 Probe                       | Z119470.0117 (PA BBO<br>500SI BBF-H-D-05 Z<br>SP) |
| 10 Number of Scans            | 114                                               |
| 11 Receiver Gain              | 188.8                                             |
| 12 Relaxation<br>Delay        | 1.0000                                            |
| 13 Pulse Width                | 15.0000                                           |
| 14 Presaturation<br>Frequency |                                                   |
| 15 Acquisition<br>Time        | 0.5767                                            |
| 16 Acquisition<br>Date        | 2020-09-10T11:05:46                               |
| 17 Modification<br>Date       | 2020-09-10T11:05:48                               |
| 18 Spectrometer<br>Frequency  | 470.57                                            |
| 19 Spectral Width             | 113636.4                                          |
| 20 Lowest<br>Frequency        | -103879.4                                         |
| 21 Nucleus                    | 19F                                               |
| 22 Acquired Size              | 65536                                             |
| 23 Spectral Size              | 131072                                            |



**5-Chloro-10,10-dimethyl-10,11-dihydro-2H-isoxazolo[2,3-f]phenanthridine-2,8(9H)-dione**  
 (Table 2, compound 3ka)

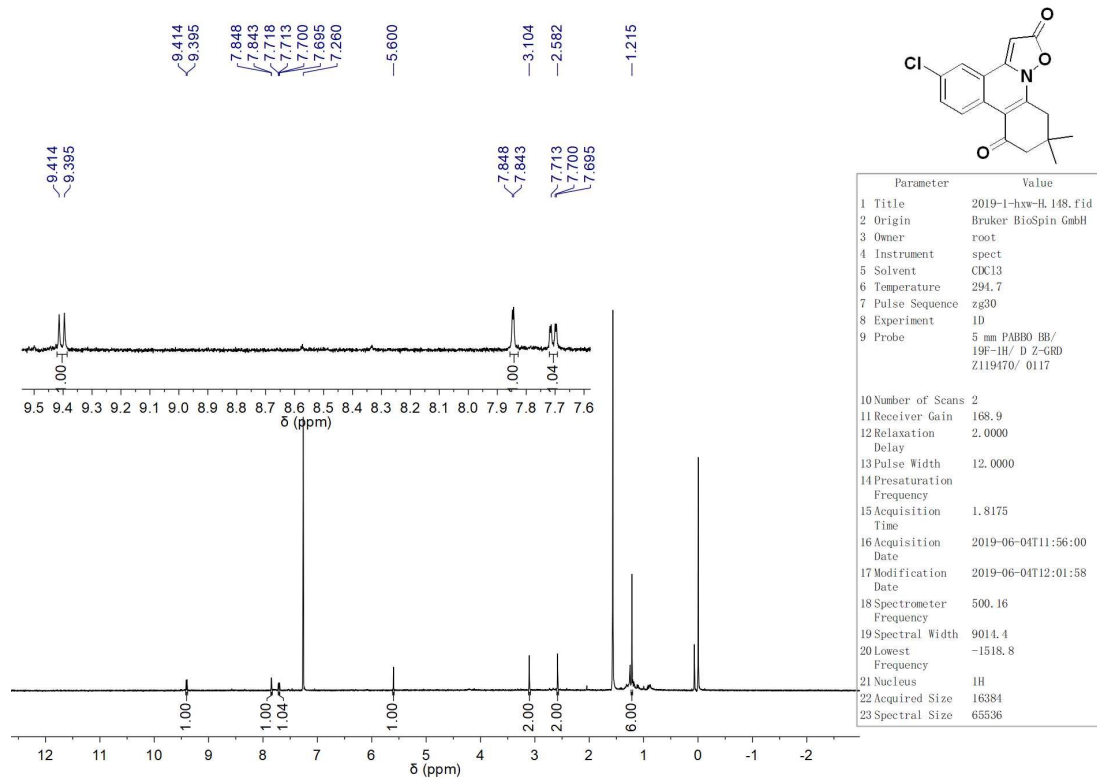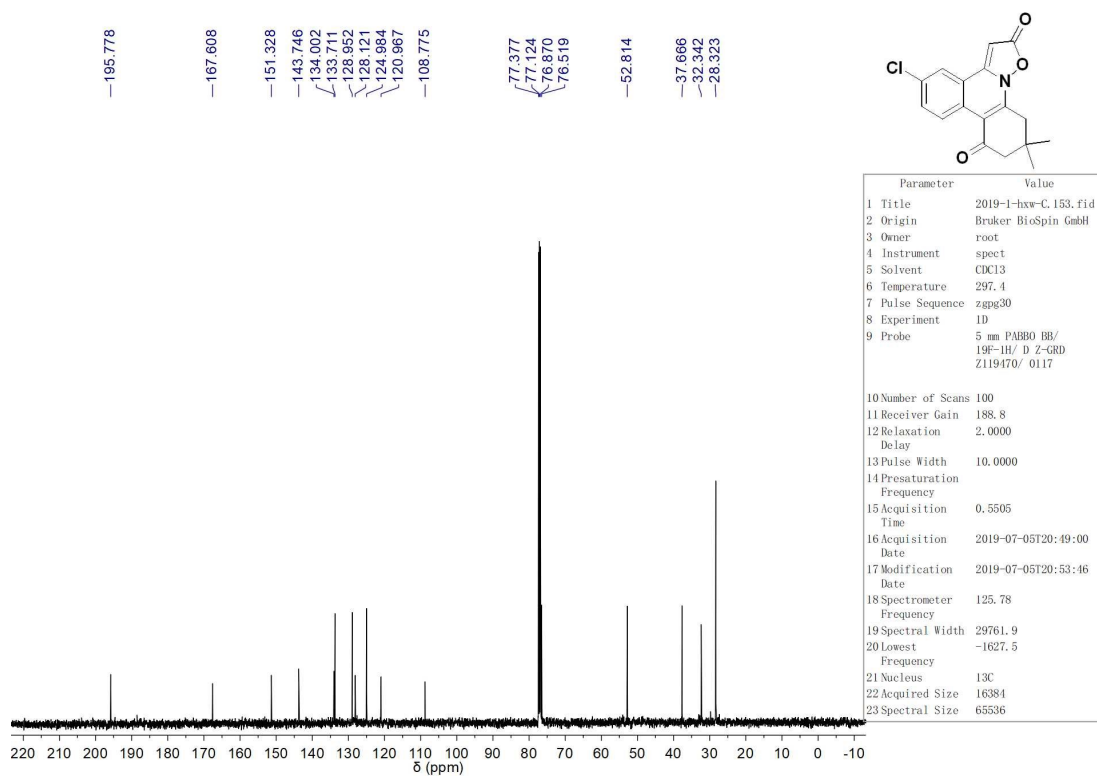

**5-Bromo-10,10-dimethyl-10,11-dihydro-2H-isoxazolo[2,3-f]phenanthridine-2,8(9H)-dione**  
(Table 2, compound 31a)

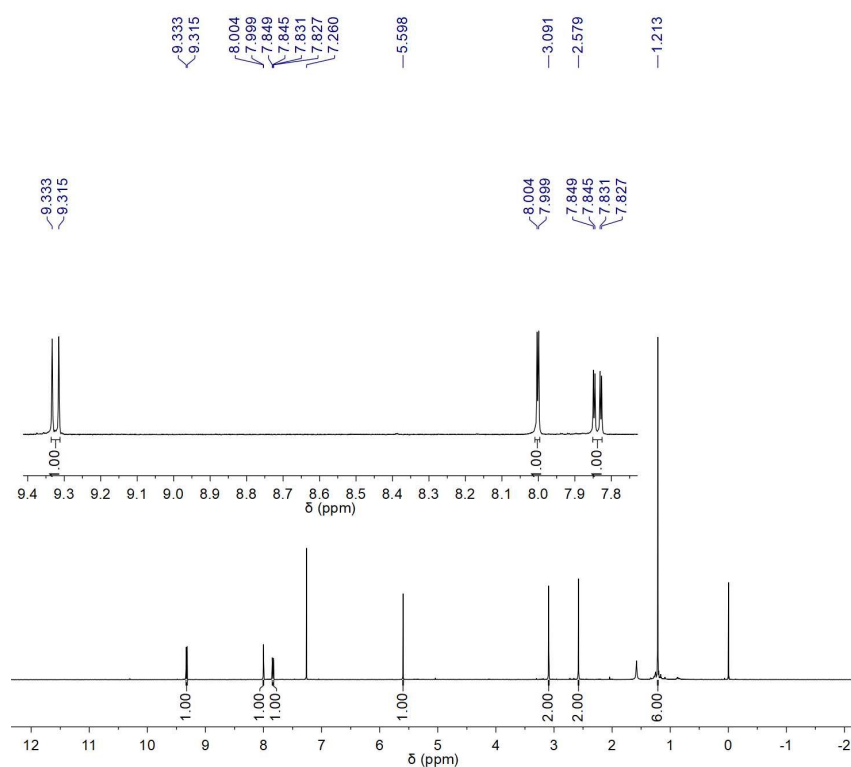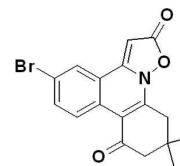

| Parameter                  | Value                                       |
|----------------------------|---------------------------------------------|
| 1 Title                    | 2019-1-hxw-H.329.fid                        |
| 2 Origin                   | Bruker BioSpin GmbH                         |
| 3 Owner                    | root                                        |
| 4 Instrument               | spect                                       |
| 5 Solvent                  | CDCl3                                       |
| 6 Temperature              | 295.1                                       |
| 7 Pulse Sequence           | zg30                                        |
| 8 Experiment               | 1D                                          |
| 9 Probe                    | Z119470.0117 (PA BBO 500S1 BBF-H-D-05 Z SP) |
| 10 Number of Scans         | 2                                           |
| 11 Receiver Gain           | 168.9                                       |
| 12 Relaxation Delay        | 2.0000                                      |
| 13 Pulse Width             | 12.0000                                     |
| 14 Presaturation Frequency |                                             |
| 15 Acquisition Time        | 1.8175                                      |
| 16 Acquisition Date        | 2019-11-28T10:27:26                         |
| 17 Modification Date       | 2019-11-28T10:27:28                         |
| 18 Spectrometer Frequency  | 500.16                                      |
| 19 Spectral Width          | 9014.4                                      |
| 20 Lowest Frequency        | -1518.8                                     |
| 21 Nucleus                 | 1H                                          |
| 22 Acquired Size           | 16384                                       |
| 23 Spectral Size           | 65536                                       |

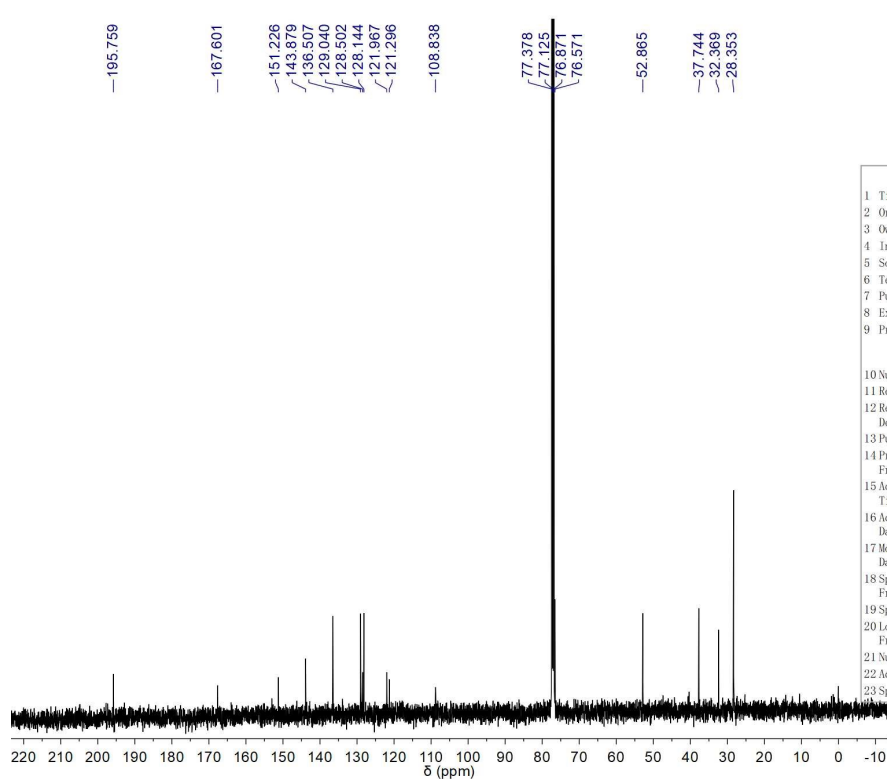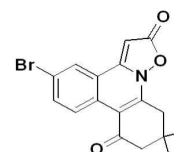

| Parameter                  | Value                                       |
|----------------------------|---------------------------------------------|
| 1 Title                    | 2019-1-hxw-C.251.fid                        |
| 2 Origin                   | Bruker BioSpin GmbH                         |
| 3 Owner                    | root                                        |
| 4 Instrument               | spect                                       |
| 5 Solvent                  | CDCl3                                       |
| 6 Temperature              | 295.7                                       |
| 7 Pulse Sequence           | zgpg30                                      |
| 8 Experiment               | 1D                                          |
| 9 Probe                    | Z119470.0117 (PA BBO 500S1 BBF-H-D-05 Z SP) |
| 10 Number of Scans         | 301                                         |
| 11 Receiver Gain           | 188.8                                       |
| 12 Relaxation Delay        | 2.0000                                      |
| 13 Pulse Width             | 10.0000                                     |
| 14 Presaturation Frequency |                                             |
| 15 Acquisition Time        | 0.5505                                      |
| 16 Acquisition Date        | 2019-11-28T11:02:29                         |
| 17 Modification Date       | 2019-11-28T11:02:32                         |
| 18 Spectrometer Frequency  | 125.78                                      |
| 19 Spectral Width          | 29761.9                                     |
| 20 Lowest Frequency        | -1627.5                                     |
| 21 Nucleus                 | 13C                                         |
| 22 Acquired Size           | 16384                                       |
| 23 Spectral Size           | 65536                                       |

**5,10,10-Trimethyl-10,11-dihydro-2H-isoxazolo[2,3-f]phenanthridine-2,8(9H)-dione (Table 2, compound 3ma)**

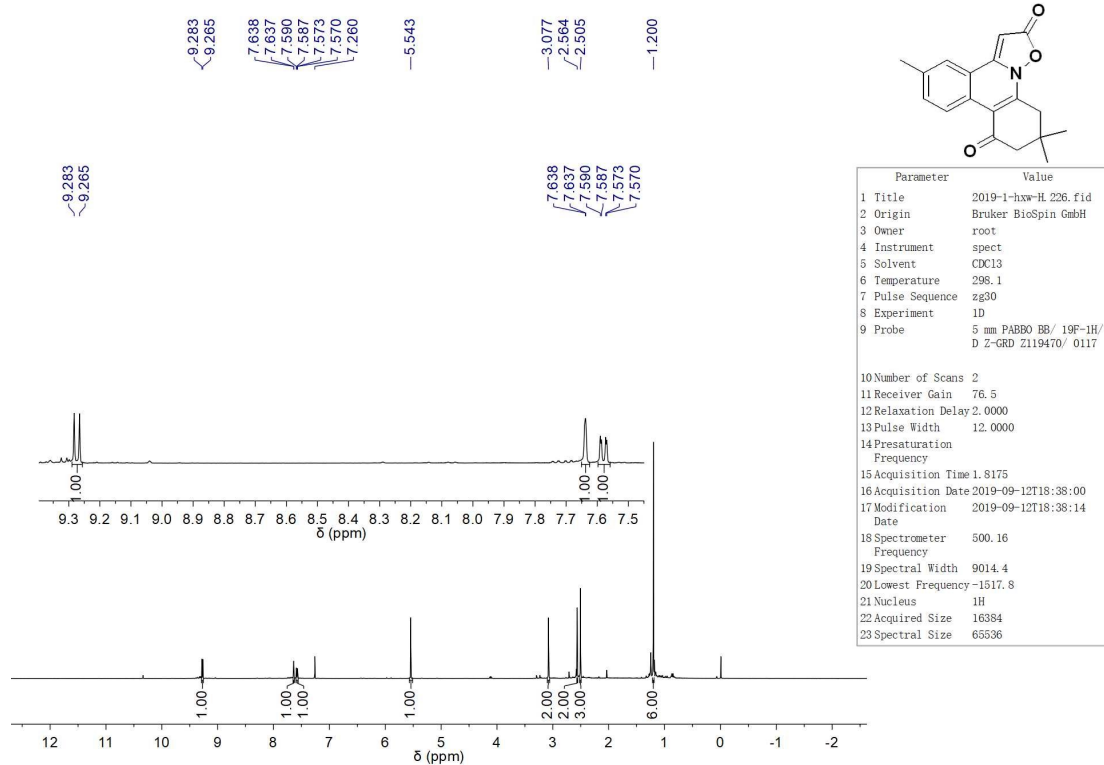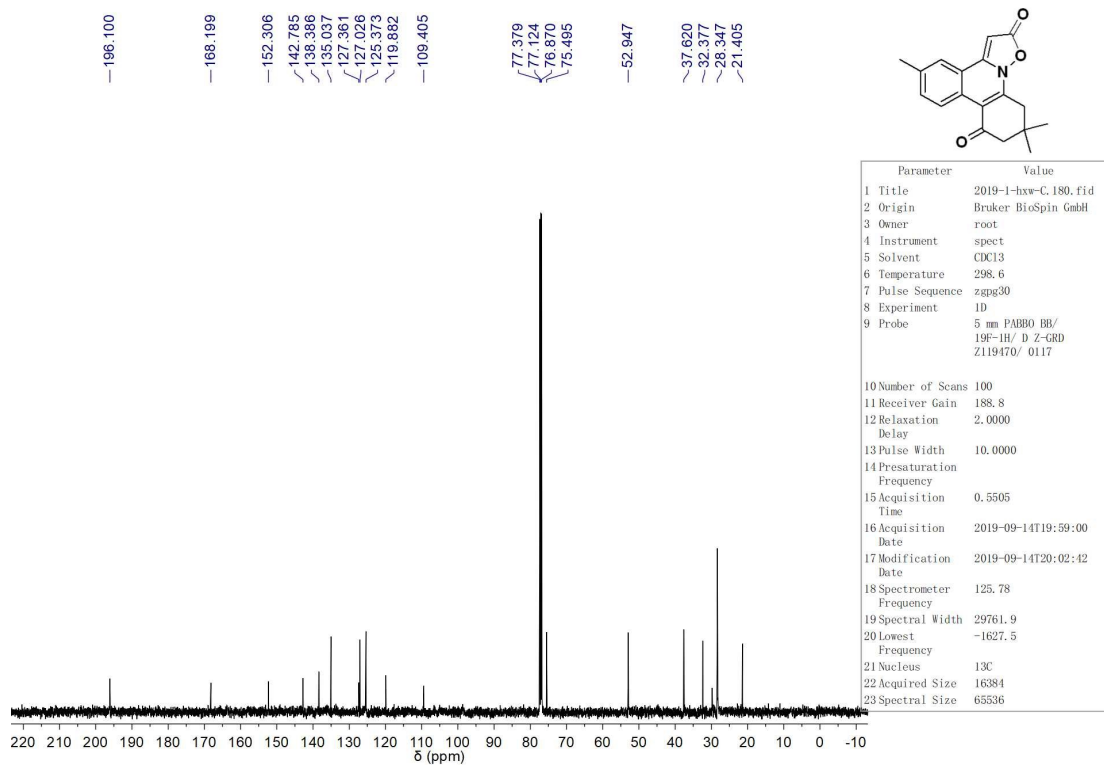

**5-Methoxy-10,10-dimethyl-10,11-dihydro-2H-isoxazolo[2,3-f]phenanthridine-2,8(9H)-dione**  
(Table 2, compound 3na)

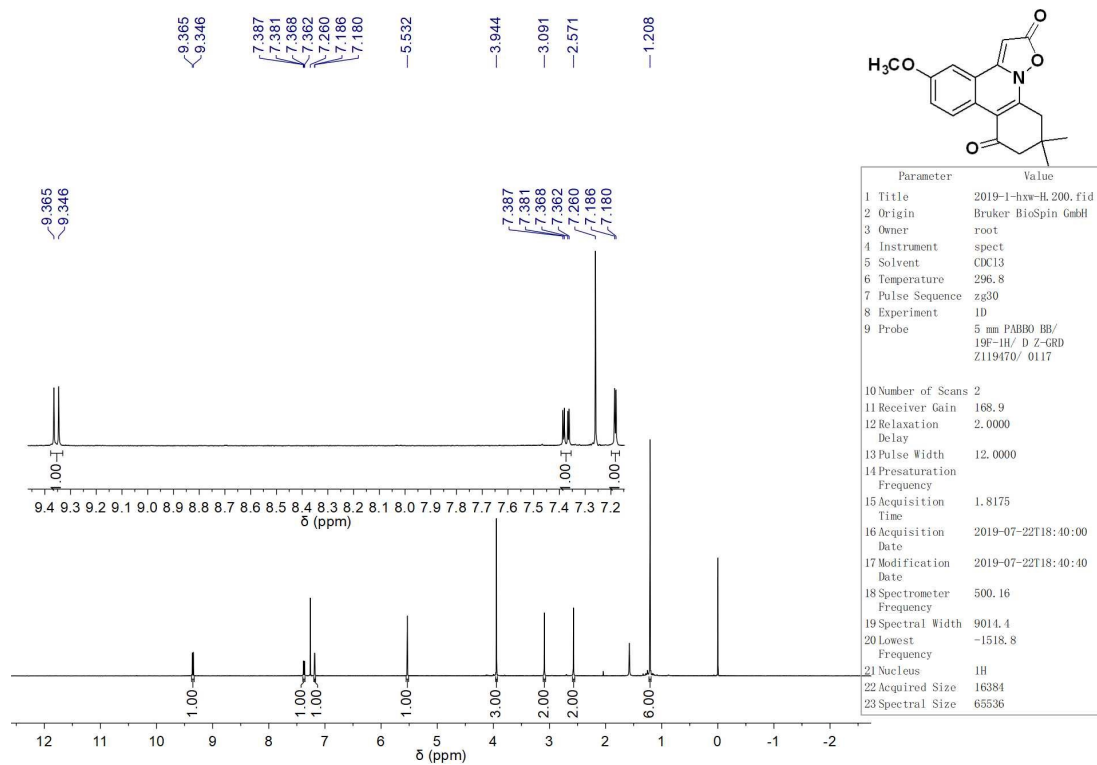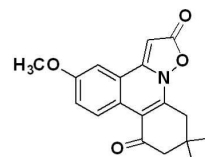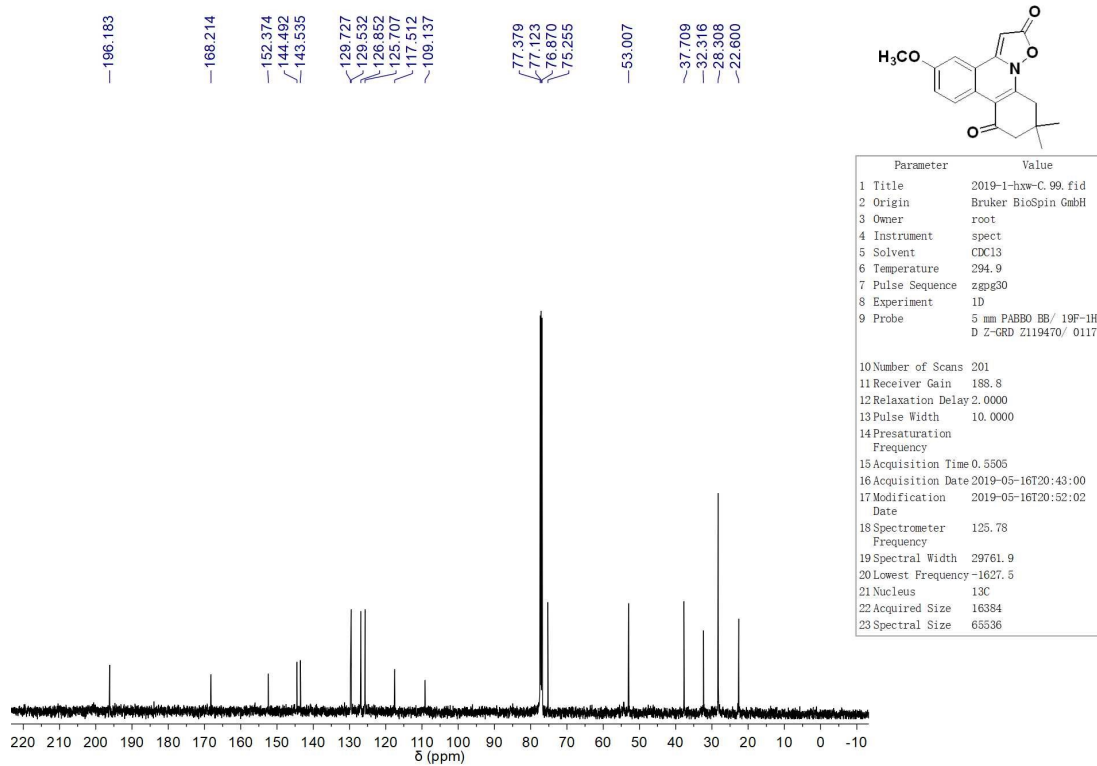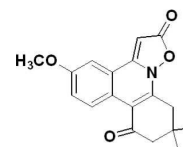

**4-Fluoro-10,10-dimethyl-10,11-dihydro-2H-isoxazolo[2,3-f]phenanthridine-2,8(9H)-dione**  
 (Table 2, compound 30a)

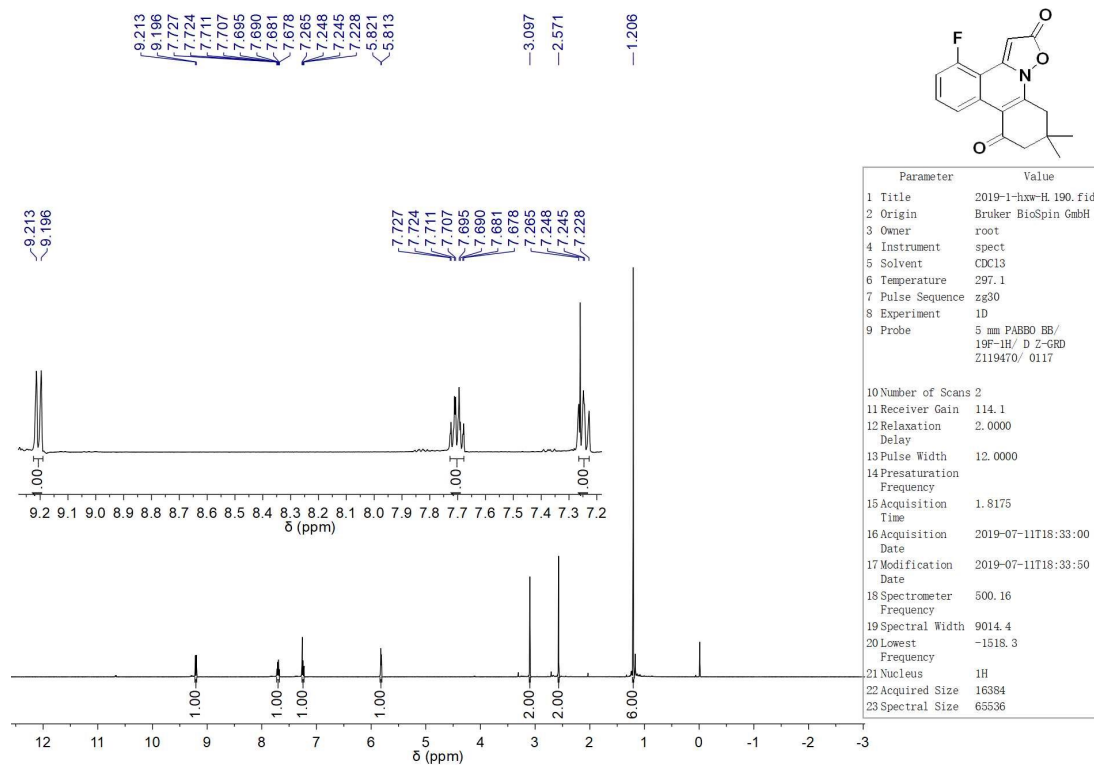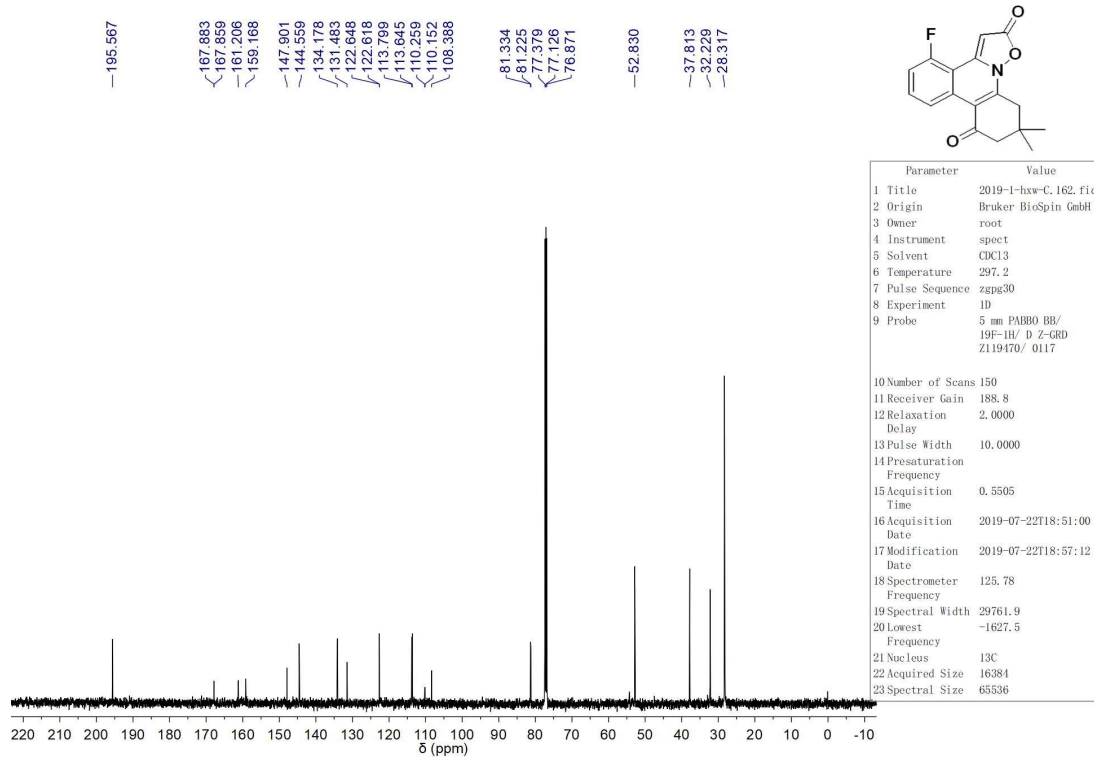

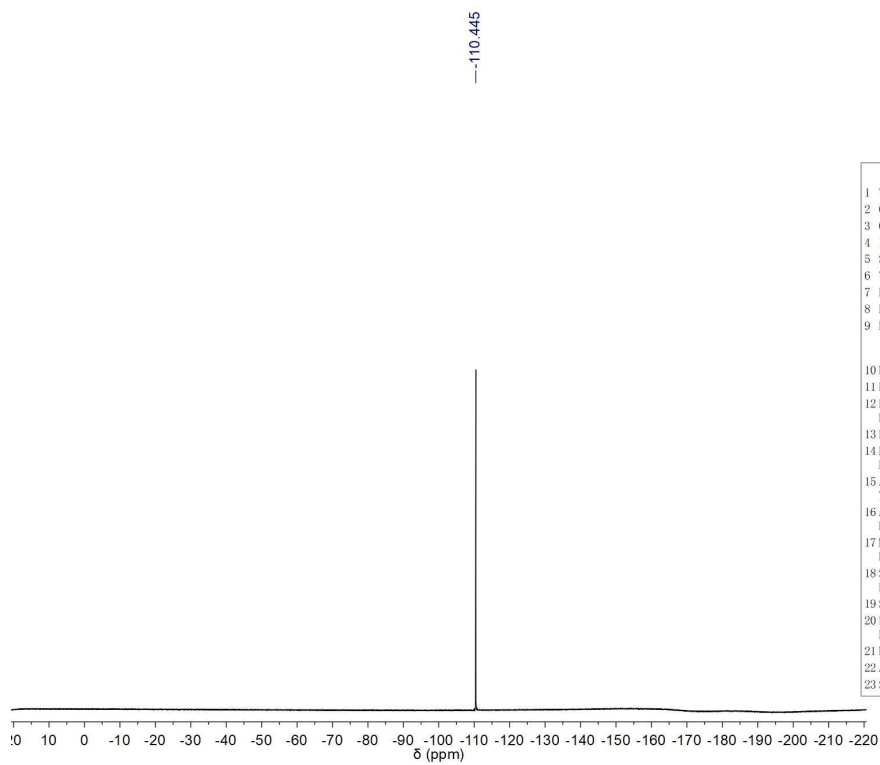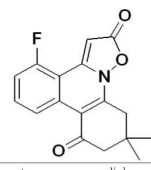

| Parameter                  | Value                                       |
|----------------------------|---------------------------------------------|
| 1 Title                    | 2020-1-syj-F.17.fid                         |
| 2 Origin                   | Bruker BioSpin GmbH                         |
| 3 Owner                    | umrsu                                       |
| 4 Instrument               | spect                                       |
| 5 Solvent                  | CDCl3                                       |
| 6 Temperature              | 296.3                                       |
| 7 Pulse Sequence           | zgfgqn                                      |
| 8 Experiment               | 1D                                          |
| 9 Probe                    | Z119470_0117 (PA BBO 500S1 BBF-H-D-05 Z SP) |
| 10 Number of Scans         | 65                                          |
| 11 Receiver Gain           | 188.8                                       |
| 12 Relaxation Delay        | 1.0000                                      |
| 13 Pulse Width             | 15.0000                                     |
| 14 Presaturation Frequency |                                             |
| 15 Acquisition Time        | 0.5767                                      |
| 16 Acquisition Date        | 2020-09-10T11:00:29                         |
| 17 Modification Date       | 2020-09-10T11:00:32                         |
| 18 Spectrometer Frequency  | 470.57                                      |
| 19 Spectral Width          | 113636.4                                    |
| 20 Lowest Frequency        | -103879.4                                   |
| 21 Nucleus                 | 19F                                         |
| 22 Acquired Size           | 65536                                       |
| 23 Spectral Size           | 131072                                      |

**4,10,10-Trimethyl-10,11-dihydro-2H-isoxazolo[2,3-f]phenanthridine-2,8(9H)-dione (Table 2, compound 3pa)**

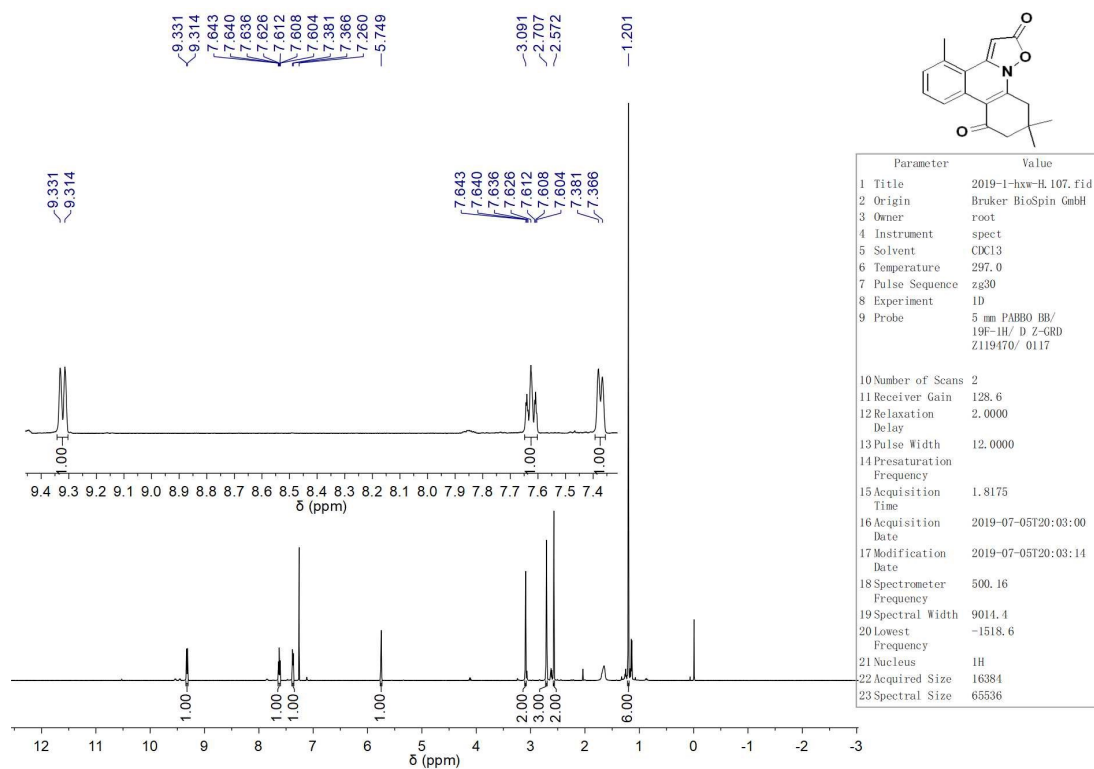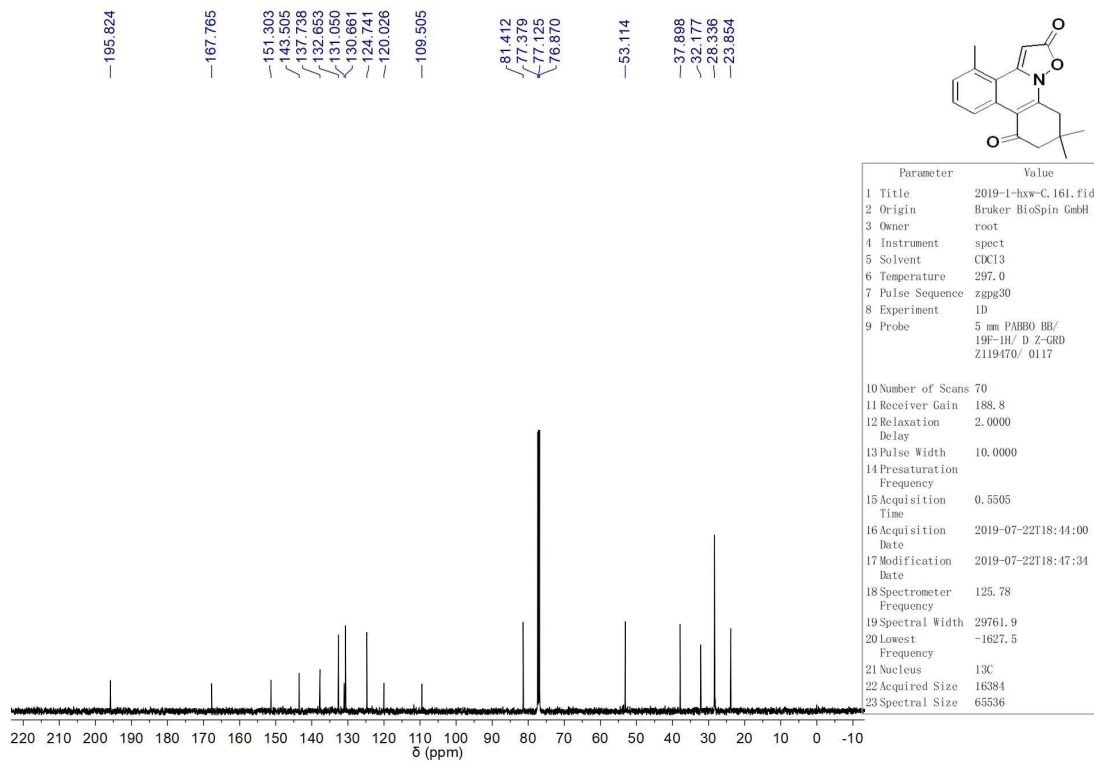

**5,6,10,10-Tetramethyl-10,11-dihydro-2H-isoxazolo[2,3-f]phenanthridine-2,8(9H)-dione (Table 2, compound 3qa)**

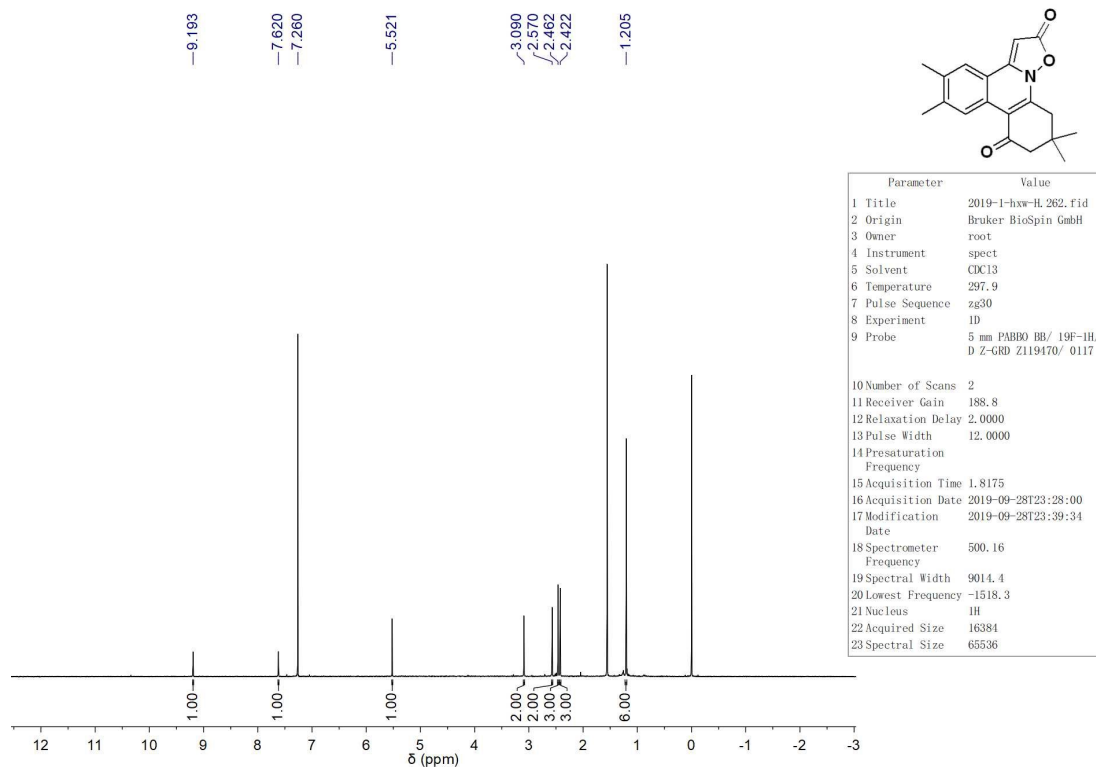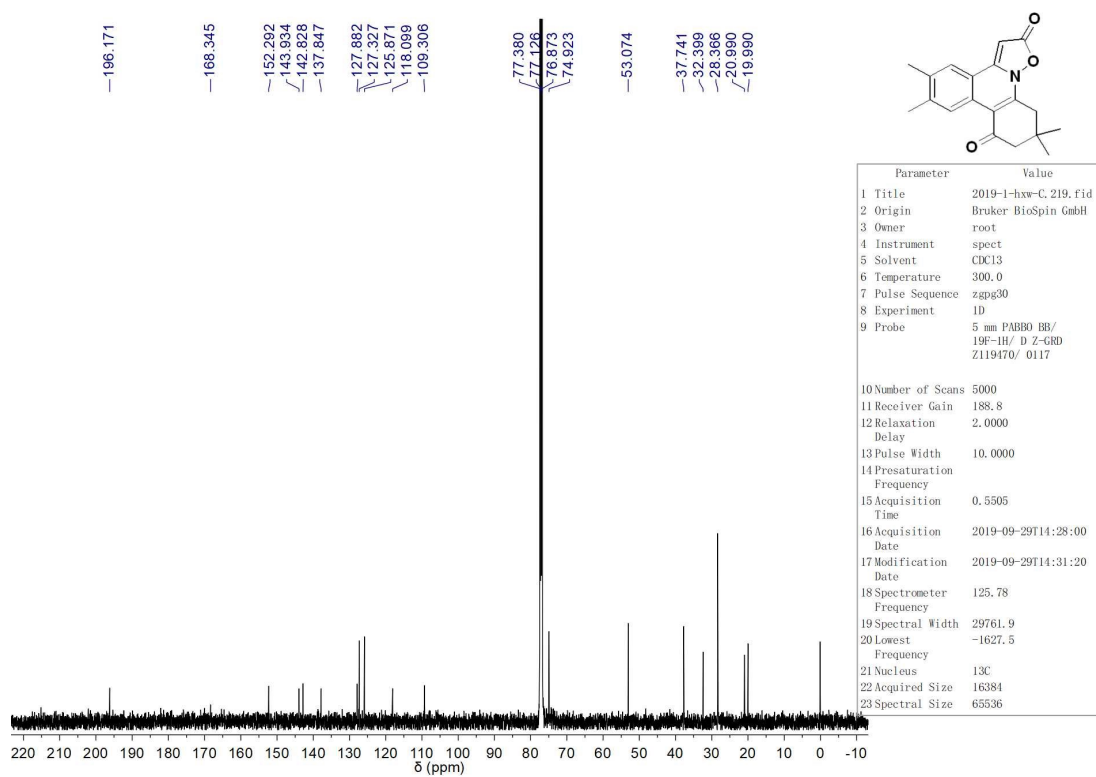



**5,6-Dimethoxy-10,10-dimethyl-10,11-dihydro-2H-isoxazolo[2,3-f]phenanthridine-2,8(9H)-dione**  
 (Table 2, compound 3ra)

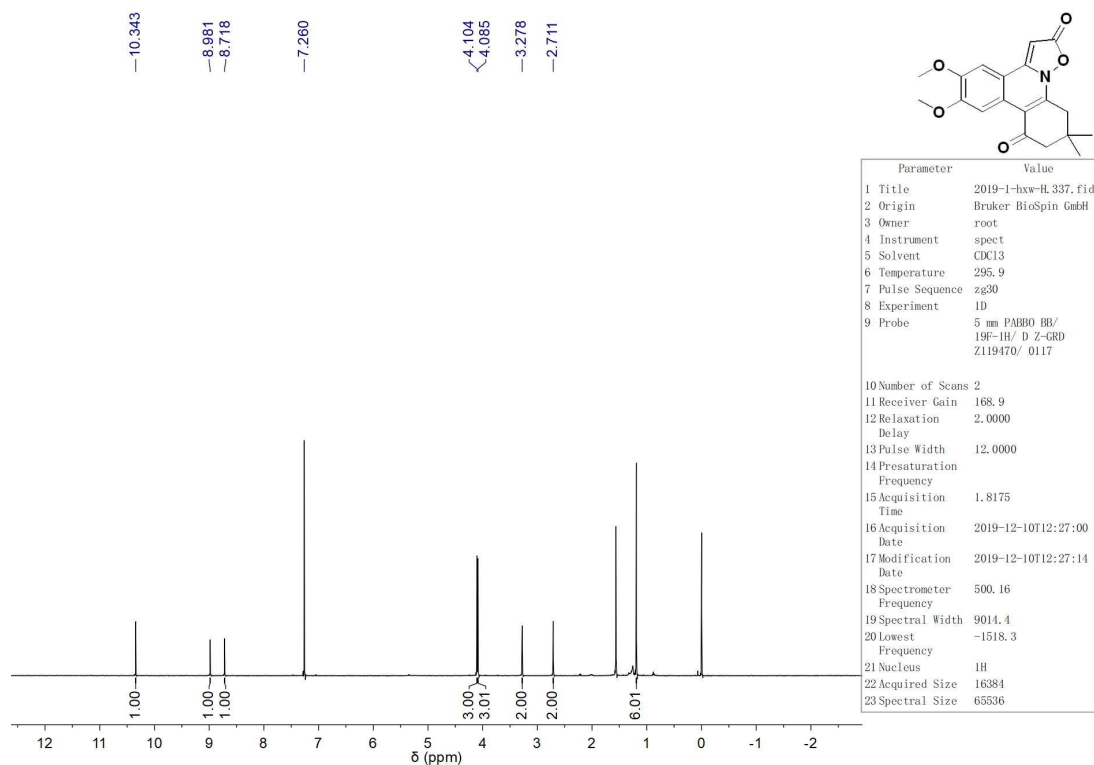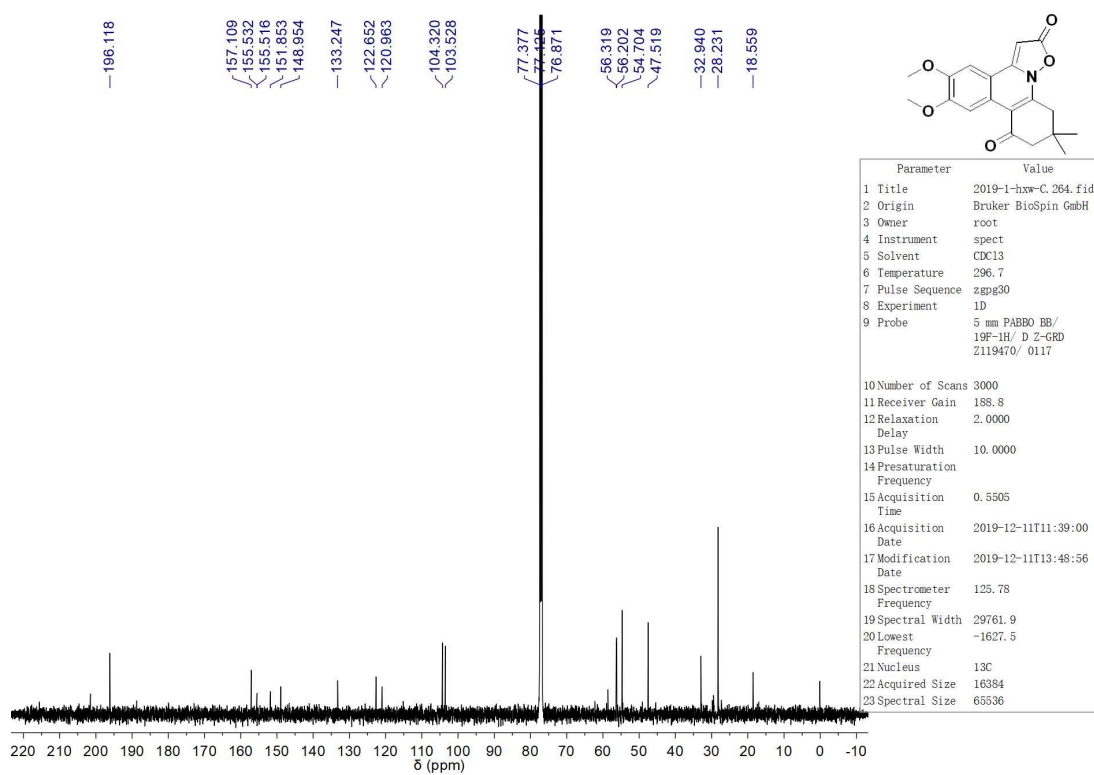

**6,6-Dimethyl-6,7-dihydro-2H-benzo[j]isoxazolo[2,3-f]phenanthridine-2,8(5H)-dione (Table 2, compound 3sa)**

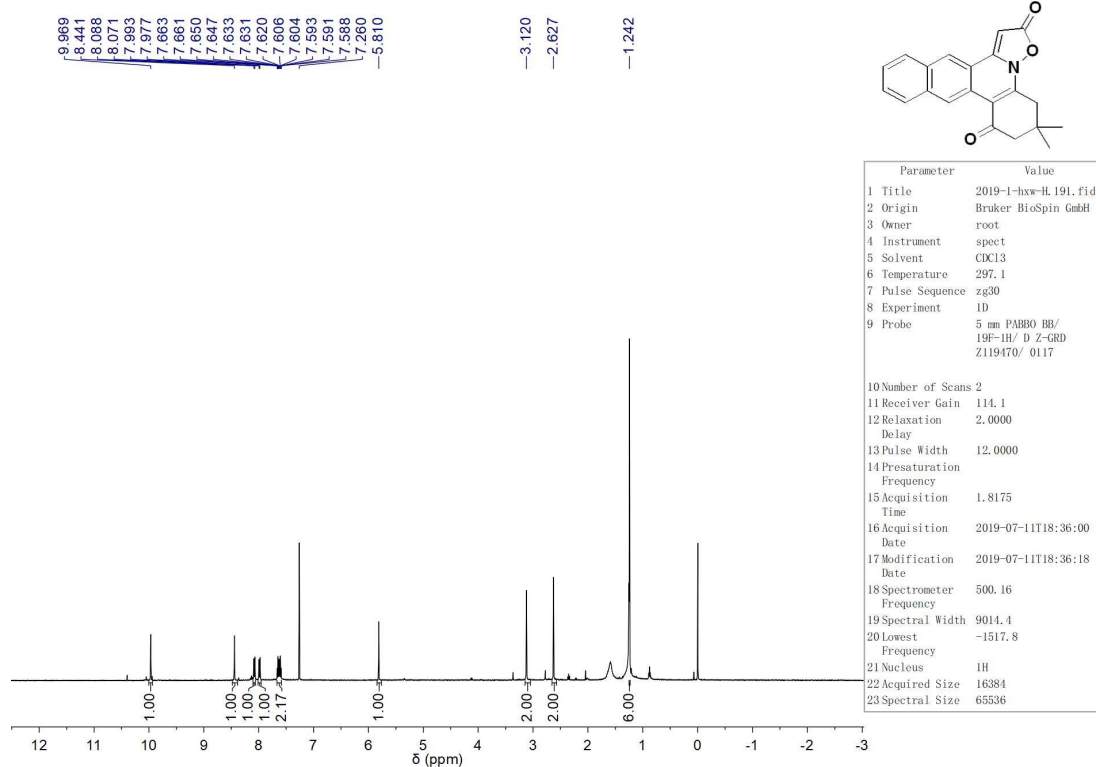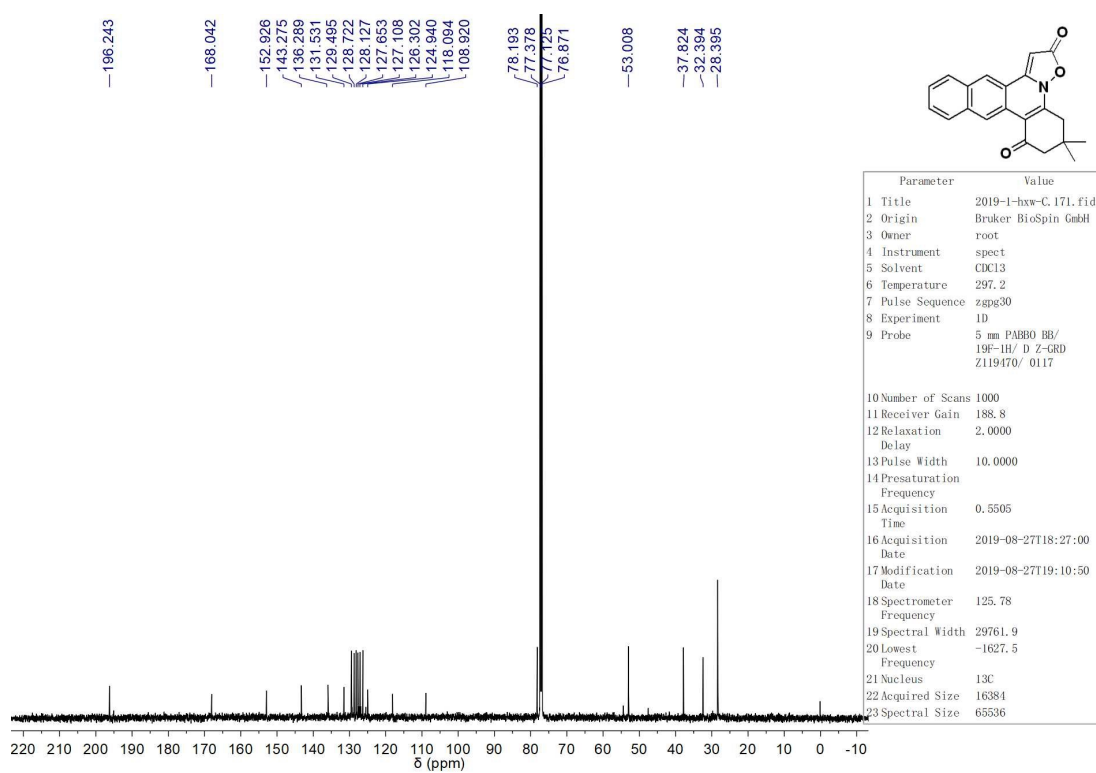

**10-Methyl-10,11-dihydro-2H-isoxazolo[2,3-f]phenanthridine-2,8(9H)-dione** (Table 2, compound 3ab)

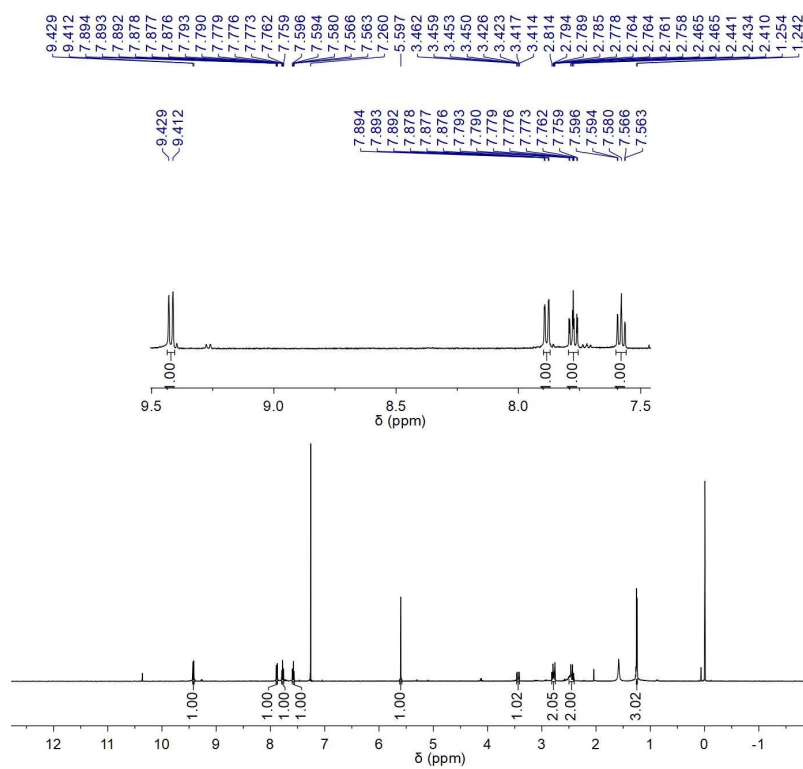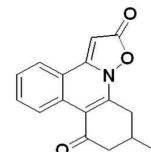

| Parameter                  | Value                                       |
|----------------------------|---------------------------------------------|
| 1 Title                    | 2019-1-hxw-H.120.fid                        |
| 2 Origin                   | Bruker BioSpin GmbH                         |
| 3 Owner                    | root                                        |
| 4 Instrument               | spect                                       |
| 5 Solvent                  | CDCl3                                       |
| 6 Temperature              | 294.6                                       |
| 7 Pulse Sequence           | zg30                                        |
| 8 Experiment               | 1D                                          |
| 9 Probe                    | 5 mm PABBO BB/19F-1H/ D Z-GRD Z119470/ 0117 |
| 10 Number of Scans         | 2                                           |
| 11 Receiver Gain           | 128.6                                       |
| 12 Relaxation Delay        | 2.0000                                      |
| 13 Pulse Width             | 12.0000                                     |
| 14 Presaturation Frequency |                                             |
| 15 Acquisition Time        | 1.8175                                      |
| 16 Acquisition Date        | 2019-05-16T20:12:00                         |
| 17 Modification Date       | 2019-05-16T20:12:12                         |
| 18 Spectrometer Frequency  | 500.16                                      |
| 19 Spectral Width          | 9014.4                                      |
| 20 Lowest Frequency        | -1518.6                                     |
| 21 Nucleus                 | 1H                                          |
| 22 Acquired Size           | 16384                                       |
| 23 Spectral Size           | 65536                                       |

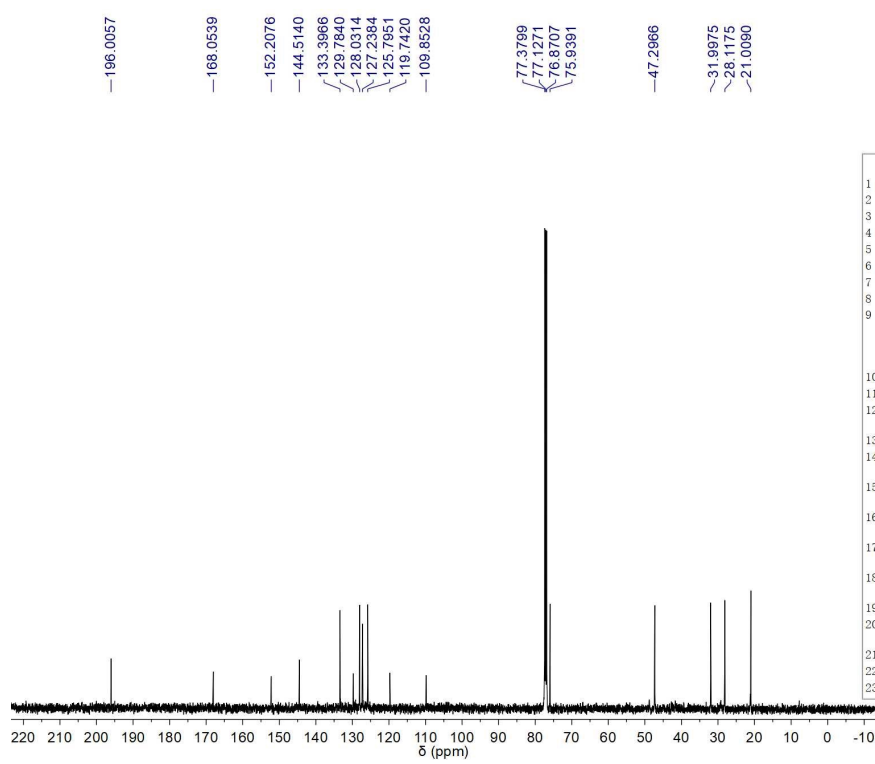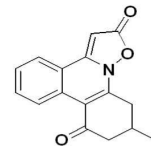

| Parameter                  | Value                                       |
|----------------------------|---------------------------------------------|
| 1 Title                    | 2019-1-hxw-C.114.fid                        |
| 2 Origin                   | Bruker BioSpin GmbH                         |
| 3 Owner                    | root                                        |
| 4 Instrument               | spect                                       |
| 5 Solvent                  | CDCl3                                       |
| 6 Temperature              | 295.1                                       |
| 7 Pulse Sequence           | zpgg30                                      |
| 8 Experiment               | 1D                                          |
| 9 Probe                    | 5 mm PABBO BB/19F-1H/ D Z-GRD Z119470/ 0117 |
| 10 Number of Scans         | 150                                         |
| 11 Receiver Gain           | 188.8                                       |
| 12 Relaxation Delay        | 2.0000                                      |
| 13 Pulse Width             | 10.0000                                     |
| 14 Presaturation Frequency |                                             |
| 15 Acquisition Time        | 0.5505                                      |
| 16 Acquisition Date        | 2019-05-25T12:29:00                         |
| 17 Modification Date       | 2019-05-25T12:35:04                         |
| 18 Spectrometer Frequency  | 125.78                                      |
| 19 Spectral Width          | 29761.9                                     |
| 20 Lowest Frequency        | -1627.5                                     |
| 21 Nucleus                 | 13C                                         |
| 22 Acquired Size           | 16384                                       |
| 23 Spectral Size           | 65536                                       |

10-Phenyl-10,11-dihydro-2H-isoxazolo[2,3-f]phenanthridine-2,8(9H)-dione (Table 2, compound 3ac)

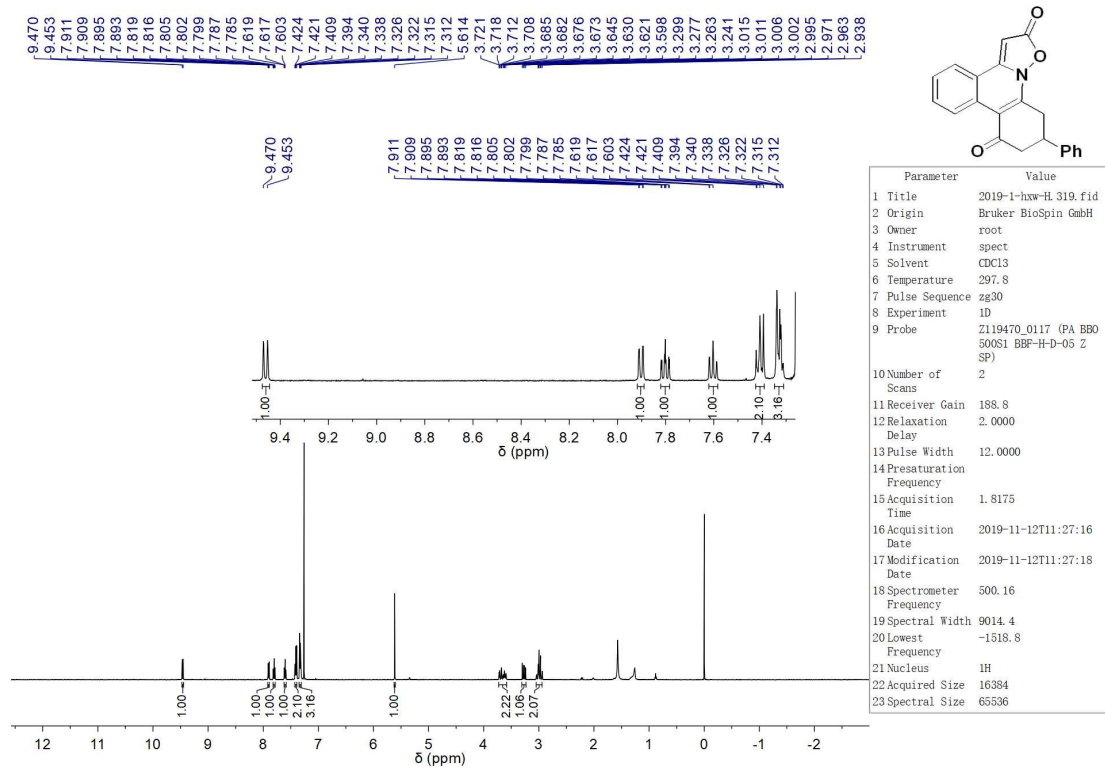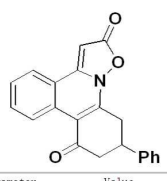

| Parameter                  | Value                                       |
|----------------------------|---------------------------------------------|
| 1 Title                    | 2019-1-hxw-H. 319. fid                      |
| 2 Origin                   | Bruker BioSpin GmbH                         |
| 3 Owner                    | root                                        |
| 4 Instrument               | spect                                       |
| 5 Solvent                  | CDCl3                                       |
| 6 Temperature              | 297.8                                       |
| 7 Pulse Sequence           | zg30                                        |
| 8 Experiment               | 1D                                          |
| 9 Probe                    | Z119470_0117 (PA BBO 500S1 BBF-H-D-05 Z SP) |
| 10 Number of Scans         | 2                                           |
| 11 Receiver Gain           | 188.8                                       |
| 12 Relaxation Delay        | 2.0000                                      |
| 13 Pulse Width             | 12.0000                                     |
| 14 Presaturation Frequency |                                             |
| 15 Acquisition Time        | 1.8175                                      |
| 16 Acquisition Date        | 2019-11-12T11:27:16                         |
| 17 Modification Date       | 2019-11-12T11:27:18                         |
| 18 Spectrometer Frequency  | 500.16                                      |
| 19 Spectral Width          | 9014.4                                      |
| 20 Lowest Frequency        | -1518.8                                     |
| 21 Nucleus                 | 1H                                          |
| 22 Acquired Size           | 16384                                       |
| 23 Spectral Size           | 6536                                        |

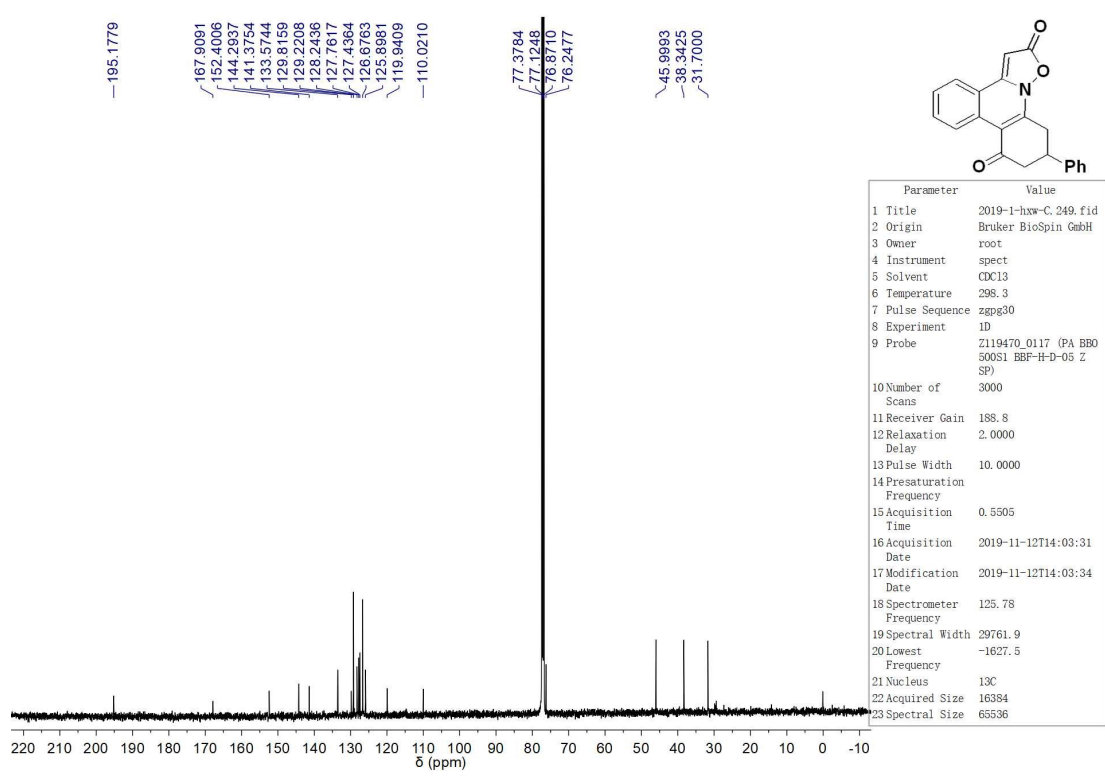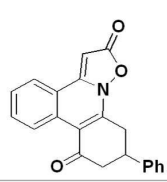

| Parameter                  | Value                                       |
|----------------------------|---------------------------------------------|
| 1 Title                    | 2019-1-hxw-C. 249. fid                      |
| 2 Origin                   | Bruker BioSpin GmbH                         |
| 3 Owner                    | root                                        |
| 4 Instrument               | spect                                       |
| 5 Solvent                  | CDCl3                                       |
| 6 Temperature              | 298.3                                       |
| 7 Pulse Sequence           | zgpg30                                      |
| 8 Experiment               | 1D                                          |
| 9 Probe                    | Z119470_0117 (PA BBO 500S1 BBF-H-D-05 Z SP) |
| 10 Number of Scans         | 3000                                        |
| 11 Receiver Gain           | 188.8                                       |
| 12 Relaxation Delay        | 2.0000                                      |
| 13 Pulse Width             | 10.0000                                     |
| 14 Presaturation Frequency |                                             |
| 15 Acquisition Time        | 0.5505                                      |
| 16 Acquisition Date        | 2019-11-12T14:03:31                         |
| 17 Modification Date       | 2019-11-12T14:03:34                         |
| 18 Spectrometer Frequency  | 125.78                                      |
| 19 Spectral Width          | 29761.9                                     |
| 20 Lowest Frequency        | -1627.5                                     |
| 21 Nucleus                 | 13C                                         |
| 22 Acquired Size           | 16384                                       |
| 23 Spectral Size           | 6536                                        |

**10,11-Dihydro-2H-isoxazolo[2,3-f]phenanthridine-2,8(9H)-dione (Table 2, compound 3ad)**

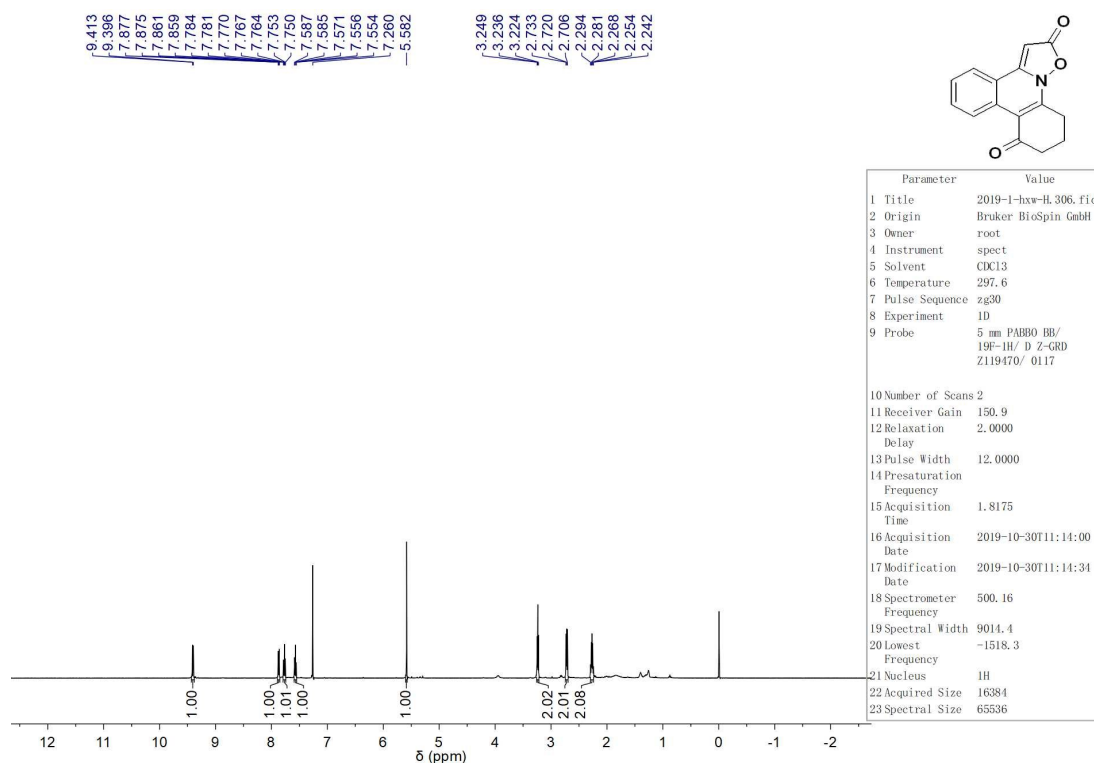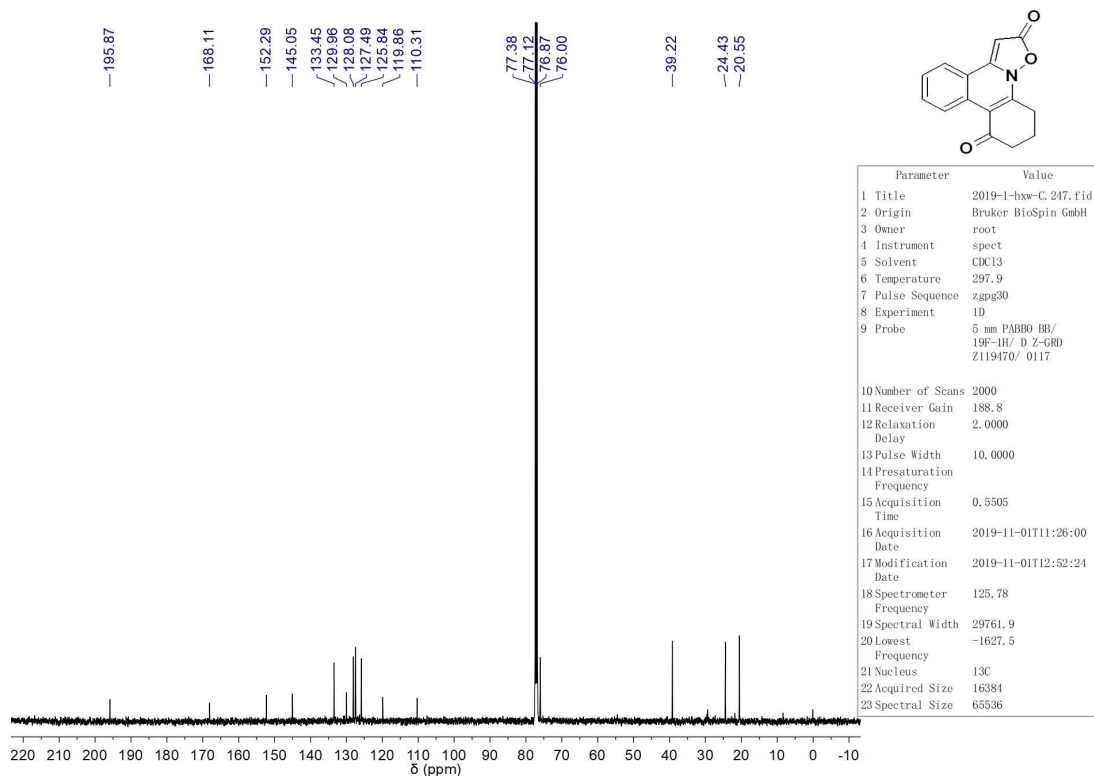

**9,10-Dihydrocyclopenta[c]isoxazolo[3,2-a]isoquinoline-2,8-dione (Table 2, compound 3ae)**

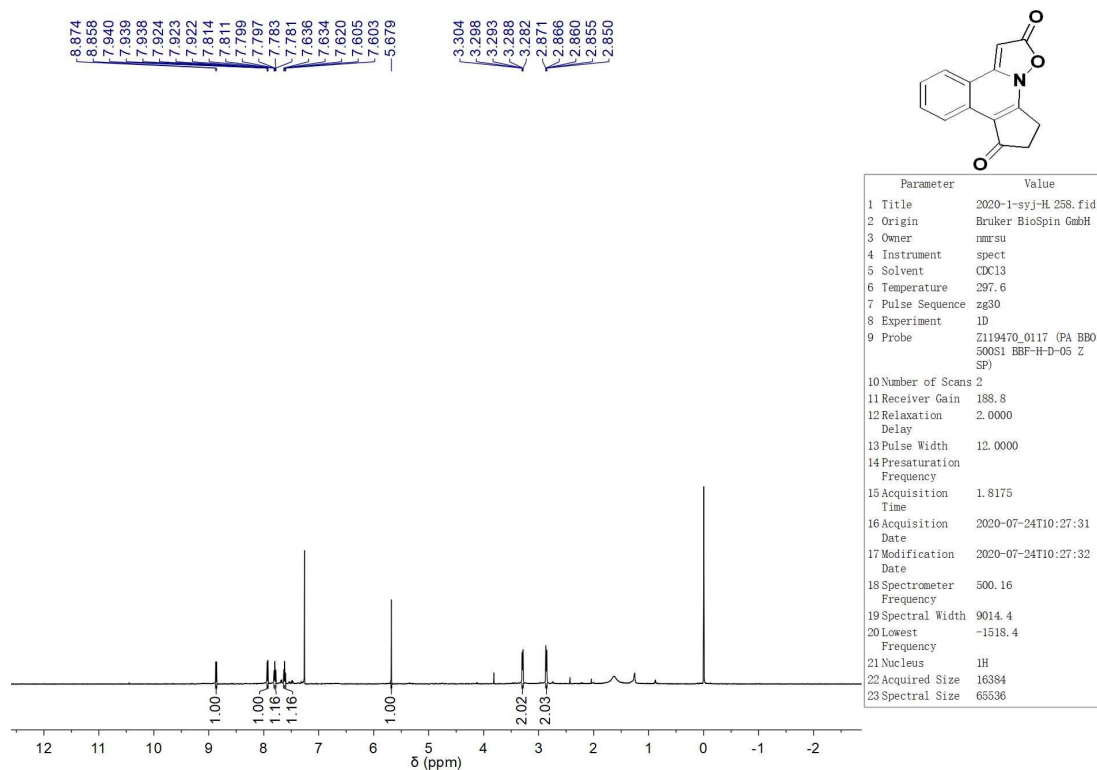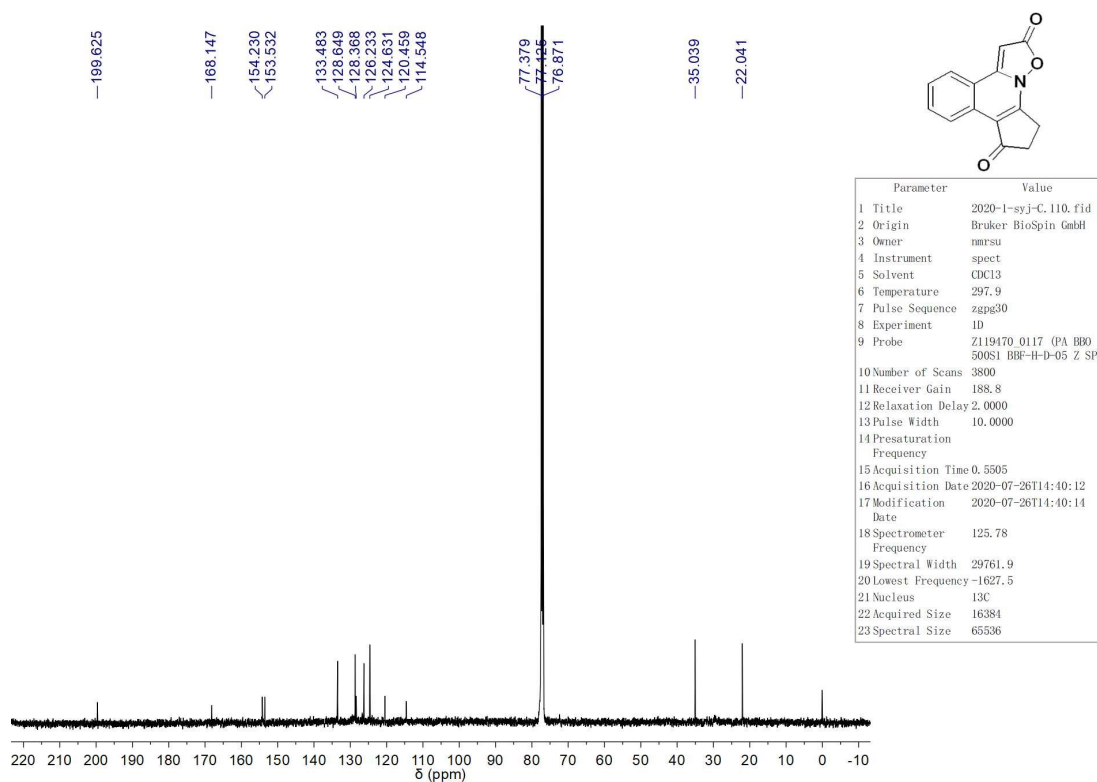

**3-Bromo-10,10-dimethyl-10,11-dihydro-2H-isoxazolo[2,3-f]phenanthridine-2,8(9H)-dione**  
(Scheme 2, compound 4)

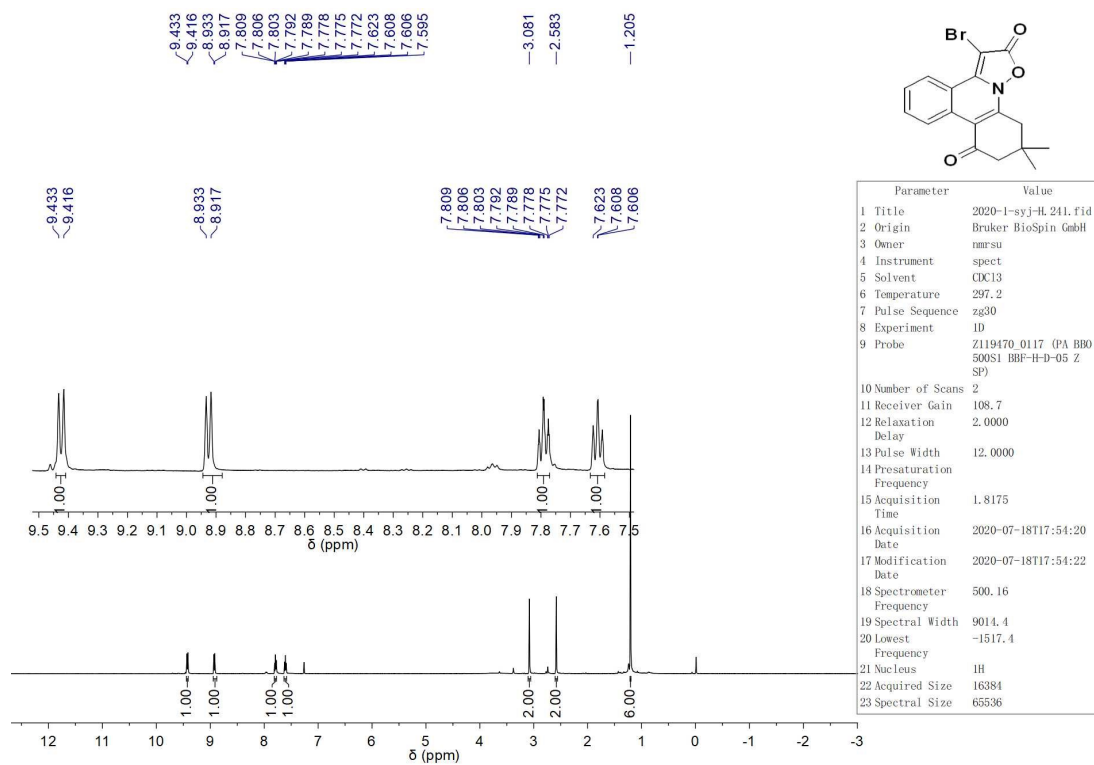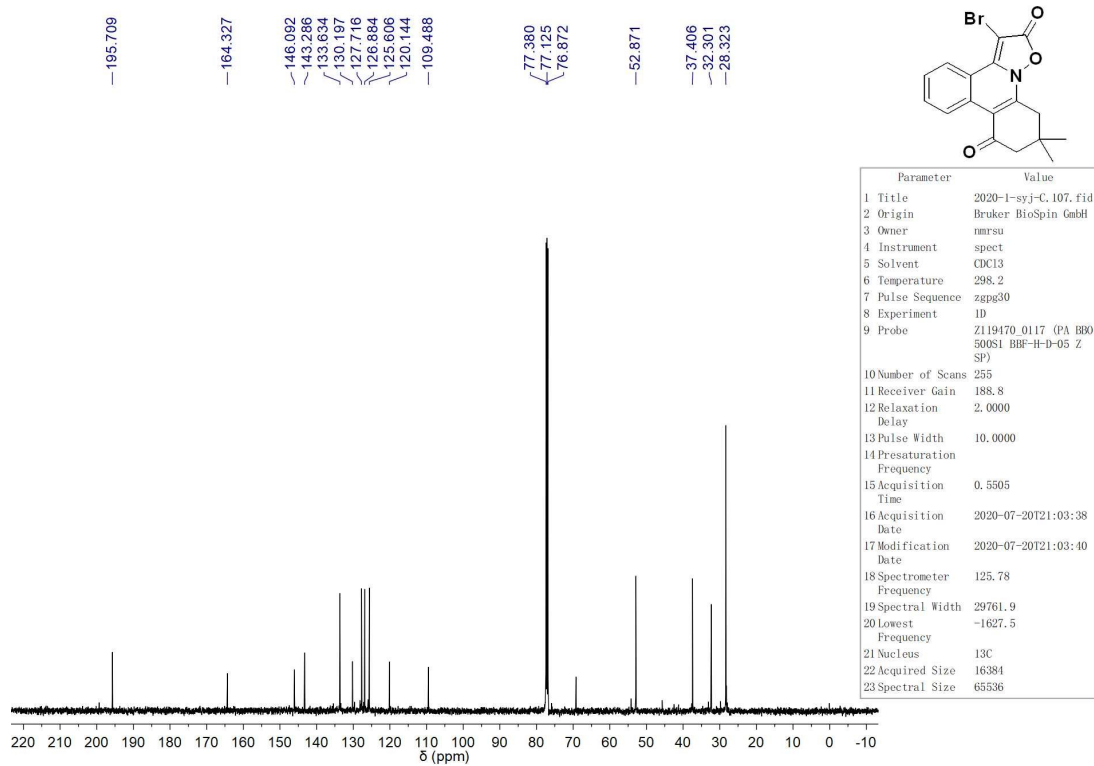

Supplement: d0ob02310h1.pdf [file d0ob02310h1.pdf]
